# Supplementary material for: Transcriptomic and coexpression network analyses revealed the regulatory mechanism of Cydia pomonella infestation on the synthesis of phytohormones in walnut husks
Source: PeerJ. 2024 Sep 23;12:e18130. doi: 10.7717/peerj.18130 (PMC11426320; doi:10.7717/peerj.18130)
Supplement: Supplemental Information 4 [file peerj-12-18130-s004.xlsx]

## Sheet: Sheet1
Table S2 Primers used for qRT-PCR
	Gene name	Forward primer (5′- 3′)	Reverse primer(5′- 3′)
ABA	LOC109020090	CTCTCTCTCTCCCCGAATCC	CAGTTGGGATTTTGGGTTGT
	LOC108990159	GCTTCCACTGCCTCACTCTC	ACCCGTACGAAGATTCAGGA
	LOC108982947	TCCCTCCGACACGATTCTAC	TGCAATATTCAGTTGGCTTTG
	LOC109017731	CTTGATGACCGTGGATGAAA	GGATGAGTTGCTAGGGCATT
	LOC109007532	TTGTAGCGCATCGTAGTTGG	GTGCAAAGGATGGGTCAGTT
SA	LOC108991021	AAGAATTACTTGCGGCCAGA	TTCCCAGAAGTTGGTGAAGC
	LOC108979694	CCCTGGGATCTTCCAAAAGT	CTGTGACCCTGTTGGGTCTT
	LOC108990221	CCTCTTCCTCGATCCTCCTC	CTGCCAGTCCCACTTTCAA
	LOC109019220	AACCCATGTCCTCGAGCTTA	GGATCGTCTGATCTTCTGCAC
	LOC109019370	GTGGATGATGGGGTTTCATC	TCATACTTTGCAGCTCCGTTT
	LOC108984287	CAGGGGCAGCATAACTCACT	AGCAGCACCGCCAATAATAG
	LOC109003208	CCACCAGCTTCTTCCTTGTC	TTGATCCATCTCCGACATCA
JA	LOC108998614	TGGGAGCCCGAAGTATAGG	TACGTACCGAGCCAAATGC
	LOC109013840	ACAACATCGGCGAGGATTAC	GTCCAATCCCCAGCTATCAA
	LOC108988687	ACGACTTGAACCCTTTCGATT	TGCTTTTGGGAGTTTTGAGAA
	LOC108996080	ATCGAGGTTTCACGGCTATG	CTTCCGCAACATCTCATCCT
	LOC108990250	TCGCCTTTTTCCCTACTCTTC	TGTTTCTGTTGAGGGCTTCC
	LOC108980184	TCTCACCCTTGACTCCGATT	GAGGCACCGGAAACTGAATA
Reference genes	18S rRNA	ATTGGTTGCGGATCAGGACT	GCTCCAATGCAACATCAAGC
