# Supplementary material for: Transcriptomic and coexpression network analyses revealed the regulatory mechanism of Cydia pomonella infestation on the synthesis of phytohormones in walnut husks
Source: PeerJ. 2024 Sep 23;12:e18130. doi: 10.7717/peerj.18130 (PMC11426320; doi:10.7717/peerj.18130)
Supplement: Supplemental Information 6 [file peerj-12-18130-s006.xlsx]

## Sheet: Sheet1
Table S4 Genes detected in all samples. Gene expression levels were shown by FPKMs
gene ID	0h-1_fpkm	0h-2_fpkm	0h-3_fpkm	12h-1_fpkm	12h-2_fpkm	12h-3_fpkm	24h-1_fpkm	24h-2_fpkm	24h-3_fpkm	36h-1_fpkm	36h-2_fpkm	36h-3_fpkm	48h-1_fpkm	48h-2_fpkm	48h-3_fpkm	72h-1_fpkm	72h-2_fpkm	72h-3_fpkm
AT063_gr001	0.47	0.1	0.07	0.24	0.14	0.89	0.07	0.28	0.14	0.15	0.07	0.09	0.19	0.1	0.14	0.2	0.11	0.17
AT063_gr002	0.21	0.38	0.62	0.23	0.17	1.01	0.02	0.22	0.2	0.16	0.17	0.2	0.21	0.54	0.22	0.3	0.22	0.18
AT063_gr003	0	0	0	0	0	0	0	0	0	0	0	0	0	0	0.51	0	0	0
AT063_gr006	0	0.49	0	0	0	0	0	0	0	0	0	0	0	0	0	0	0	0
AT063_gr007	0.68	0.68	0.68	0.48	0.28	1.6	0.26	0.57	0.4	0.43	0.26	0.32	0.53	0.88	0.41	0.52	0.45	0.42
AT063_gr008	0.74	0.48	1.02	0.5	0.64	1.7	0.32	0.24	0.56	0.56	0.26	0.38	0.68	0.64	0.42	0.92	0.42	0.35
AT063_gt001	0	1.37	4.62	0	0	0.69	1.42	0	0	0.75	0.67	0	0.65	0	0	0.66	0	0
AT063_gt002	0	0	0	0	1.48	0	0	0.72	0	0	2.05	1.31	0	1.32	1.46	0	0	0.72
AT063_gt003	8.57	16.69	22.2	14.81	12.69	25.36	10.71	21.68	5.88	11.92	12.31	12.85	22.98	24.24	6.55	10.06	5.94	12.35
AT063_gt004	5.77	9.96	8.01	2.46	8.72	13.31	4.29	8.45	1.7	6.33	7.27	5.41	5.52	3.11	2.58	4.84	1.71	6.79
AT063_gt005	0.7	2.81	2.71	0	0	0	0.73	0	0	0	2.05	0.65	0	0	0	0	1.45	0
AT063_gt006	0	1.88	0.6	1.24	0	0	0	0	0	0	0	1.16	0	0	0	0	0	0.64
AT063_gt007	0	0.68	0	0	0	0.69	3.54	0	0	0	0	0	0	1.28	0.71	0	0	0
AT063_gt008	0	0	0	0	0	1.21	0.62	0	0	0	0	0.56	0	1.69	0	2.93	1.24	0
AT063_gt009	0	0	0	0	0	0.69	0	0	0	0	0	0	1.98	0	0	0	0	0
AT063_gt010	0.7	0	1.36	0.7	0	1.41	0	2.86	0	0	2.05	0	2.67	0	0.73	0.68	0	0
AT063_gt011	0.54	0.54	2.63	1.08	2.29	3.27	1.69	1.11	0	2.37	1.06	0	1.04	0	1.69	1.06	0	1.11
AT063_gt012	0	0	0	0	0	0	0	0	0	0	0.69	0	2.71	0	0	0	0	0
AT063_gt013	0	0.68	0	0	0	0	0	1.39	0	1.49	2.66	0	1.95	0.64	0	0	0	0
AT063_gt014	1.16	4.66	3.37	2.3	1.22	0.58	1.2	1.19	0.59	1.9	3.4	9.21	3.87	3.27	3.61	1.13	1.2	7.14
AT063_gt015	0	0	0	0	0	0.69	0	2.82	0	0.76	0	0	0.66	0	0	0	0.72	0
AT063_gt016	1.18	0.6	0.57	0	0.63	2.39	3.08	0	0.61	0	1.16	1.66	0	0	0	1.16	0	0.61
AT063_gt017	0	0	0.67	0.69	0	0	0	0	0	0	0.67	1.29	0	0	1.44	0	0	0
AT063_gt018	2.07	4.16	4.01	5.49	8.01	25.02	9.33	7.77	9.22	18.14	10.12	7.75	23.74	7.79	8.61	6.06	2.87	8.51
AT063_gt019	0	0	0.68	0	0	2.11	0	0	0.72	2.3	0.68	0	0.67	0.66	0	0	0	2.16
AT063_gt020	0	1.37	0.66	1.35	0.72	0	4.95	1.39	6.99	1.49	2	1.91	7.16	1.28	0.71	1.99	7.07	2.8
AT063_gt021	2.04	1.37	0	2.71	2.16	2.06	0.71	0.7	0.7	1.49	6.65	7	4.55	0	2.12	1.99	0.71	2.1
AT063_gt024	0	0	0	0	0	0	0	0	0	0	0	0	0	0	0	0	0	0
AT063_gt025	1.4	0.7	0.68	0	0	0	0.73	0	0	0	0	0.65	0.67	0	0	0	0	0
AT063_gt026	0	0	0	0	0	0.69	0	1.41	0	0.76	0	0	0.66	0	0	0	0	0
AT063_gt027	0	0	0	0	0	0	0	0	0	0	0	0	0.65	0	0	0.66	0	0
AT063_gt029	0.63	0	6.1	2.51	1.33	3.17	0.65	0	0	4.83	1.23	1.18	0.6	2.96	4.58	2.46	0	0
AT063_gt032	0	0	0	0	0	0.69	0	0	0	0	0	0	0	0	0	0	0	0
AT063_gt033	0	1.41	0	0.7	0	0	0.73	0	0	0	0	0	0	0	0	0	0	0
LOC108979030	5.97	7.25	4.91	2.55	2.37	1.22	0.93	4.72	1.74	1.63	2.62	3.5	3.48	3.16	2.32	2.04	1.05	1.65
LOC108979031	26.33	20.23	29.73	20.59	7.41	14.36	4.76	11.22	6.28	13.17	17.61	21.63	8.67	14.17	4.94	8.85	10.18	10.25
LOC108979037	1.86	0.09	1.62	1.11	0.88	1.31	0.29	1.14	0.38	4.38	2.36	7.74	1.33	1.49	0.1	0.45	0.19	1.43
LOC108979039	12.06	16.15	20.34	14.82	15.97	19.08	14.35	20.67	21.39	19.65	18.52	16.78	24.82	17.39	25.95	15.45	20.8	23.47
LOC108979040	4.52	4.34	4.37	3.3	2.88	3.11	2.19	3.06	2.28	2.92	3.29	4.14	2.55	3.57	2.11	3.47	1.84	2.49
LOC108979044	5.34	3.84	4.63	6.95	9.94	6.24	5.9	5.36	5.22	6.43	4.88	5.18	4.67	3.93	5.25	3.25	6.77	4.57
LOC108979045	1.06	0.64	0.77	1.16	1.26	0.69	0.14	0.49	0.35	0.55	0.93	1.07	0.89	0.45	0.52	0.52	0.52	0.16
LOC108979046	0	0	0.05	0	0.16	0.05	0.05	0	0	0	0	0	0.1	0.05	0	0	0.1	0
LOC108979048	0	0.23	0	0.04	0.08	0	0	0.12	0.04	0.33	0.11	0	0.04	0.04	0.04	0.07	0.16	0
LOC108979049	15.94	14.5	16.88	26.95	29.61	24.03	19.82	11.95	14.47	16.29	11.61	15.06	14.7	15.09	22.43	14.38	27.3	19.47
LOC108979050	3.08	4.62	4.9	3.11	4.73	3.3	5.26	5.14	3.69	4.91	3.92	3.39	3.69	5.23	4.7	4.14	4.93	3.85
LOC108979055	191.98	172.53	170.77	99.6	94.52	173.68	78.09	108.23	100.19	129.68	143.26	127.59	271.03	135.03	69.38	143.16	100.63	129.97
LOC108979058	19.55	14.16	17.05	24.35	29.17	30.33	14.89	14.44	15.57	13.5	16.51	19.36	14.84	17.79	15.25	15.26	11.73	17.26
LOC108979061	0	0	0	0	0.17	0	0	0	0.16	0	0	0	0	0	0	0.1	0	0
LOC108979062	0	0	0	0	0	0	0.07	0	0	0	0	0	0	0	0	0	0	0
LOC108979063	8.6	8.53	10.05	10.5	8.79	10.32	4.74	7.91	4.81	7.59	11.2	10.92	5.07	8.84	6.66	6.5	6.27	6.17
LOC108979064	9.89	10.63	11.81	6.95	7.27	6.43	6.67	11.48	6.98	8.56	13.16	6.75	7.31	10.41	6.54	11.59	6.76	7.8
LOC108979065	12.4	16.92	16.2	11.85	20.21	15.01	18.04	17.31	17.51	20.21	19.07	14.21	17.59	17.36	17.13	14.28	12.68	13.6
LOC108979066	49.04	49.87	48.13	40.2	33.71	34.21	29.2	47.97	35.69	44.79	45.98	52.39	56.15	59.47	35.96	33.44	43.23	39.74
LOC108979067	27.94	29.38	27.89	40.38	39.2	38.18	39.58	28.29	48.74	46.31	53.13	47	41.66	35.12	40.77	34.67	41.53	43.92
LOC108979068	52.61	60.38	50.55	91.96	115.79	95.54	106.23	48.29	67.04	49.45	39.94	59.65	86.38	67.45	101.81	48.83	78.14	90.9
LOC108979069	0.07	0.32	0.05	0.17	0	0	0.05	0.3	0	0.03	0	0.18	0.21	0.39	0	0.05	0.18	0.03
LOC108979070	0.1	0.19	0.19	5.32	5.29	7.65	12.75	1.98	9.3	2.94	3.78	0.52	0.21	0.73	13.94	4.16	2.69	3.45
LOC108979071	6.75	7.49	8.1	8.79	11.87	7.92	15.86	10.59	11.13	12.1	11.54	6.58	12.6	8.44	11.84	9.7	13.11	12.05
LOC108979072	44.59	61.27	55.17	50.85	45.12	39.53	56.87	92.48	64.04	74.22	66.32	77.99	173.25	105.6	66.63	52.66	65.84	78.37
LOC108979073	79.68	92.95	79.47	82.03	82.18	59.85	98.49	94.69	106.27	120.83	100.24	101.94	176.57	115.99	119.53	84.25	115.47	106.55
LOC108979074	0	1.36	0.15	0	0	0.48	0.08	0	0	0	0	0	0	0	0.08	0	0	0
LOC108979075	0.4	0.4	0.68	2.6	6.11	3.27	26.76	1.95	10.76	2.64	2.16	0.59	0.58	0.35	15.94	7.61	7.12	9.56
LOC108979077	0	0	0	0	0.13	0	0.06	0	0.19	0	0	0	0	0	0	0	0	0
LOC108979078	4.06	5.76	4.97	7.48	7.43	6.92	3.85	5.82	3.81	4.19	4.62	5.86	5.87	7.13	4.39	4.4	3.31	4.32
LOC108979079	0.07	0	0	0	0	0	0.18	0	0.04	0	0	0	0	0	0.04	0	0	0
LOC108979080	0.05	0.05	0	0.05	0	0.05	2.39	0.15	0.45	1.55	0.05	0.09	0.33	0.09	2.95	0.24	3.2	1.36
LOC108979081	0.32	0.56	0.34	0.53	0.1	0.58	0.43	0.31	0.43	0.91	0.43	0.3	0.58	0.28	0.46	0.29	0.12	0.05
LOC108979083	0	0	0	0	0.21	0	0.21	0	0.31	0.05	0	0	0	0	0.21	0.1	0	0
LOC108979085	0	0	0	0.04	0	0	0	0	0	0	0	0	0	0	0	0	0	0
LOC108979086	7.56	12.48	8.58	18.21	14.53	11.21	17.4	10.22	18.35	34.42	34.57	18.02	11.29	17.45	27.48	16.94	18.71	11.31
LOC108979087	11.44	26.01	12.24	11.34	16.22	16.95	18.9	17.1	15.09	8.89	14.15	9.57	11.78	12.89	16.51	28.8	11.9	14.53
LOC108979088	22.69	27.08	24.55	29.58	30.51	27.21	32.06	23.95	30.1	34.85	30.91	29.43	29.47	26.05	30.14	21.91	33.19	29.28
LOC108979089	1.31	1.04	2.44	2.25	3.89	4.44	15.11	2.12	7.92	4.91	3.68	1.92	1.08	2.69	8.52	2.39	4.37	3.58
LOC108979090	63.39	37.37	61.85	47.84	37.13	41.38	33.59	41.95	37.71	38.57	25.8	35.55	34.92	38.12	32.74	27.31	41.73	36.55
LOC108979091	28.62	25.64	30.04	31.52	26.11	28.07	27.68	33.76	26.86	38.02	21.12	35.23	30.59	34.4	24.84	26.15	30.17	27.8
LOC108979093	5.15	6.87	4.84	4.45	2.97	4.07	6.02	4.86	4.44	3.8	3.81	3.55	3.58	3.73	3.89	4.22	5.8	4.57
LOC108979094	82.48	69.42	76.49	161.4	291.46	194.38	972.03	109.47	554.83	220.7	173.06	67.26	113.79	81.72	694.71	385.25	383.99	355.82
LOC108979095	9.66	8.04	8	1.78	2.11	4.85	3	7.31	3.78	6.4	6.05	6.03	6.38	8.82	1.48	3.52	1.81	2.75
LOC108979096	24.52	17.27	41.77	21.95	29.95	53.86	40.29	24.98	36.15	21.96	15.12	26.8	23.1	32.7	39.69	41.9	28.95	43.28
LOC108979097	10.11	11.17	10.15	15.22	18.11	14.44	21.14	12.56	14.68	11.47	9.62	11.63	12.04	13.97	17.95	12.21	16.29	14.76
LOC108979098	15.24	23.27	20.02	9.68	15.12	24.01	20.63	21.07	27.56	11.93	7.67	9.18	12.25	17.1	23.26	39.96	22.71	17.53
LOC108979099	7.35	5.84	7.38	8.97	11.92	14.2	31.74	14.76	20.27	13.51	10.94	14.45	7.49	10.87	23.87	40.02	12.74	12.36
LOC108979100	152.03	153.99	148.7	186.37	227.26	180.28	204.64	148.54	182.4	135	142.18	182.47	212.39	171.73	176.96	135.18	133.67	231.72
LOC108979101	11.9	12.77	13.46	24.75	24.35	19.6	19.57	14.4	19.91	24.72	22.77	20.84	15.05	13.95	22.21	16.05	23.88	19.3
LOC108979102	8.17	10.22	8.57	8.53	11.61	9.79	7.89	9.47	9.02	8.12	8.12	9.57	9.15	8.17	11.04	6.25	9.26	7.34
LOC108979103	4.14	1.4	3.71	8.6	4.3	7.48	5.83	10.24	25	161.07	307.58	25.1	31.21	15.13	3.86	38.18	17.1	40.73
LOC108979104	0.13	0.16	0.18	3.1	5.57	11.43	3.95	1.59	3.42	0.29	1.47	0.3	0.3	0.6	3.59	5.38	0.52	0.41
LOC108979105	0.56	1	1.04	0.65	0.46	1.3	0.15	1.1	0.63	0.88	0.93	0.64	0.63	1.21	0.66	0.45	0.33	0.37
LOC108979107	38.25	21.69	63.5	40.36	76.53	133.77	58.51	69.08	90.85	88.69	58.86	51.55	14.6	31.95	143.7	110.69	28.55	31.92
LOC108979108	32.37	28.56	25.55	20.54	16.29	18.72	16.29	29.91	18.77	30.32	22.5	39.26	53.6	39.06	18.48	19.03	17.11	19.8
LOC108979112	0	0	0	0	0	0	0	0.06	0	0	0.03	0	0	0	0	0	0	0
LOC108979114	0.43	0.26	0.48	1.94	1.38	3.88	7.22	1.1	3.76	7.7	8.5	5.25	1.25	2.11	6.02	5.63	4.82	5.71
LOC108979116	0.04	0	0.04	0	0	0	0.12	0.24	0	0.09	0.04	0	0.22	0	0.04	0	0.37	0
LOC108979117	18.83	20.77	22.93	10.04	10.86	5.27	8.76	13.19	8.07	14.16	28.27	16.3	10.8	14.75	7.84	17.09	6.2	13.75
LOC108979118	0.74	0.43	0.72	1.01	0.62	1.66	0.89	1.36	1.15	1.46	0.73	1.4	1.83	1.1	0.39	0.57	0.83	0.55
LOC108979119	182.97	159.82	158.18	53.5	36.44	34.2	14.05	129.11	28.5	51.78	26.7	39.05	87.7	82.28	20.67	86.8	67.71	18.89
LOC108979123	23.84	21.34	23.46	27.26	31.26	24.63	21.27	20.24	19.74	24	22.58	23.09	14.63	21.52	22.32	20.36	21.59	20.42
LOC108979124	1.53	0.64	1.03	0.9	0.39	1.07	0.55	1.25	1.04	1.22	1.09	1.24	3.34	1.6	0.33	0.52	0.66	1.42
LOC108979125	0	0	0	0	0	0	0.08	0	0	0	0	0	0	0	0	0.14	0	0.45
LOC108979126	19.5	16.58	17.74	10.69	15.44	12.35	7.65	15.13	10.01	15.29	17.38	13.36	10.29	12.42	12.17	12.18	8.85	10.23
LOC108979127	5.65	4.65	6.23	3.54	2.3	5.62	1.31	5.44	1.38	4.44	3.7	4.33	4.75	4.1	1.07	0.86	1.19	1.61
LOC108979128	27.1	33.8	33.3	33.13	30.45	32.52	17.29	29.89	25.92	23.77	28.75	31.11	29.79	30.58	27.03	22.23	21.35	22.2
LOC108979129	3.78	3.24	9.26	6.23	5.97	14.31	1.55	9.06	6.88	6.81	12.49	2.47	1.66	3.34	10.43	6.27	4.1	2.27
LOC108979130	47.62	54.24	41.69	23.17	22.08	18.71	6.19	35.57	14.66	33.55	61.84	19.8	46.37	20.81	13.93	31.74	14.36	29.51
LOC108979131	3.19	6.99	2.9	9.69	16.08	10.79	6.51	4.56	6.15	4.19	3.81	4.69	9.18	8.71	7.81	4.82	6.57	5.29
LOC108979132	0	0	0	0	0	0	0	0	0	0	0	0.03	0	0	0	0	0	0
LOC108979133	3.36	3.32	3.49	3.79	2.68	2.85	3.47	4.41	2.85	4.37	4.88	3.73	3.5	4.06	3.75	3.83	3.37	3.4
LOC108979135	1.04	0.77	1.6	5.46	3.13	7.4	3.26	3.14	2	5.64	5.07	4.37	1.22	1.86	2.25	1.12	1.31	1.26
LOC108979138	0.09	0.18	0.15	0.11	0.05	0.13	0.18	0.11	0.07	0.41	0.26	0.33	0.23	0.4	0.35	0.11	0.16	0.59
LOC108979139	1.54	0.64	2.26	153.17	491.43	195.04	797.33	17.83	433.88	118.89	190.19	6.58	18.12	38.92	595.72	566.84	348.14	469.47
LOC108979140	3.69	1.68	3.86	1.32	1.91	1.76	0	3.43	1	2.98	2.59	7.77	4	2.95	1.09	0.54	0.07	0.14
LOC108979141	3.17	0.82	2.64	0.9	5.46	3.66	0.19	1.86	1.68	2.68	5.15	7.13	1.04	1.11	3.3	0.44	0.47	1.03
LOC108979143	0	0	0	0	0	0	0	0	0	0.05	0	0	0	0	0	0	0	0
LOC108979144	0	0	0	0.04	0	0	0	0	0.05	0.43	0	0	0	0	0.69	0	0.82	0.36
LOC108979145	1.98	2.58	2.38	2.97	3.84	3.34	2.06	2.49	3.23	2.17	1.24	1.92	1.64	1.32	1.65	4.29	2.38	1.97
LOC108979146	4.09	3.17	4.7	1.1	1.06	4.22	3.82	1.43	2.07	4.03	2.32	3.32	1.4	2.11	0.85	1.27	1.22	1.4
LOC108979147	0.08	0.12	0.18	0.34	0.45	1.53	1.27	1.6	0.75	0.31	0.37	0.69	0.14	0.84	0.84	0.66	0.6	0.91
LOC108979150	0	0	0.03	0	0.05	0	0	0	0	0	0	0	0	0	0.05	0	0.03	0
LOC108979151	0.06	0	0.02	0.02	0.33	0.08	0.05	0.05	0.15	0.02	0.09	0.31	0	0.06	0.03	0.17	0	0.28
LOC108979152	5.9	5.78	6.61	3.34	5.06	4.08	3.32	5.18	4.05	3.38	5.88	5.53	4.94	5.76	4.32	2.75	4.31	2.79
LOC108979153	5.36	4.06	6.93	4.71	3.54	3.52	1.79	4.89	1.32	4.37	5.25	4.84	2.45	3.99	2.2	1.64	2.97	1.92
LOC108979154	0.7	0.3	0.18	0.11	0.28	0.11	0.06	0.38	0.41	0.62	0.18	0.5	0.1	0.23	0.22	0.05	1.31	0.11
LOC108979155	0	0.15	0	0.07	0	0.08	1.01	0	0.31	0.33	0.58	0	0.14	0.14	0.46	0.58	0	0.31
LOC108979156	9.94	10.86	10.14	9.72	10.11	7.91	8.03	6.59	5.17	7.54	8.11	10.72	3.92	6.8	8.55	7.92	10.03	6.64
LOC108979158	17.54	16.91	19.27	12.85	14.1	10.87	10.66	16.53	9.44	16.31	12.4	18.62	18.41	16.51	12.25	12.25	14.05	12.18
LOC108979159	14.09	18.79	13.9	41.89	44.23	32.74	37.52	21.32	29	19.76	20.1	17.53	19.96	20.29	31.28	13.89	32.33	29.67
LOC108979160	22.11	24.4	27.06	25.3	29.63	27.66	23.28	18.82	20.21	20.46	18.76	23.93	17.16	20.2	17.96	16	20.25	17.33
LOC108979161	192.92	218.6	192.06	260.72	349.9	184.68	340.75	194.1	418.07	292.55	340.31	189.29	240.58	218.77	358.81	329.04	415.41	426.42
LOC108979163	3.11	3.96	3.31	2.97	3.94	1.31	2.96	3.64	3.67	4.59	3.74	3.39	3.07	3.47	3.79	2.47	2.32	2.32
LOC108979164	0	0	0	0	0	0	0	0	0	0	0.04	0	0	0	0	0	0	0
LOC108979165	0	0	0	0	0	0.17	0	0	0.03	0.03	0	0.03	0	0.08	0	0	0	0
LOC108979168	39.48	46.47	40.04	39.47	44.35	31.24	28.56	48.05	30.2	37.74	40.49	43.92	44.3	43.1	37.2	30.27	34.94	42.91
LOC108979169	21.97	18.57	20.05	25.81	26.97	25.42	30.53	21.05	32.01	31.02	23.27	28.95	22.1	19.4	34.5	24.59	25.48	25.14
LOC108979170	5.17	5.97	5.14	8.9	12.25	8.27	9.95	6.76	8.04	7.72	6.93	6.61	6.05	7.99	9.78	5.31	5.62	5.63
LOC108979171	15.12	10.13	15.52	8.82	6.79	9.71	2.08	6.07	2.28	4.93	4.61	9.96	8.33	10.08	2.53	2.3	3.04	4.33
LOC108979173	0	0	0.02	0	0	0	0	0	0	0	0	0.02	0.14	0	0	0	0	0
LOC108979174	11.92	16.25	13.44	16.5	16.16	13.96	12.73	17.3	13.21	13.7	13.3	14.39	12.06	13	15.59	14.44	12.32	13.2
LOC108979176	93.23	82.51	121.24	82.37	43.54	37.6	8.5	74.48	16.75	33.83	73	72.79	46.84	66.74	26.44	43.21	37.59	46.69
LOC108979177	0.44	0.17	0.37	0.22	0.12	0	0.51	0.11	0.28	0.48	0.32	0.21	0.53	0.16	0.11	0.16	0.51	0.28
LOC108979179	1.41	0.75	1.04	1.07	0.47	1.22	1.24	0.6	0.42	0.73	0.14	1.59	0.23	0.3	0.97	0.37	1.43	1.1
LOC108979180	0.04	0	0	0	0	0	2.03	0.08	0.08	0.35	0.27	0	0	0	0.41	0	1.04	1.35
LOC108979181	0	0	0	0	0	0	0.32	0	0.24	1.01	0	0	0.37	0	1.51	0	3.34	0.95
LOC108979182	0	0	0.06	0	0.06	0	0.63	0.12	0.06	0.07	0	0.17	0	0.11	0	0	0.06	0
LOC108979184	0.26	0.64	0.43	0.16	0.42	0.28	0.93	0.46	0.27	0.13	0	0.37	0.67	0.77	0.46	0.02	1.88	1.23
LOC108979185	3	2.52	4.36	2.33	3.46	5.34	2.05	5.86	2.13	3.5	2.94	2.69	2.24	3.18	2.74	2.81	1.85	2.13
LOC108979187	3.08	3.49	2.73	3.38	2.76	2.68	3.14	2.74	2.22	3.92	2.62	4.68	2.89	3.9	3.4	2.33	3.74	2.99
LOC108979188	28.65	27.74	29.88	28.87	33.71	33.26	28.96	31.76	28.9	28.04	21.91	25.84	24.08	27.28	30.1	35.59	28.8	27.79
LOC108979193	0	0	0	0	0	0	0	0	0	0.15	0	0	0	0	0	0	0	0
LOC108979196	0	0	0	0	0.4	0.08	0.31	0.04	0.12	0.04	0	0.04	0	0	0.08	0.11	0.08	0.35
LOC108979198	35.43	36.51	38.73	52.76	54.61	55.7	40.3	32.44	42.16	68.99	74.82	72	44.15	44.89	52.5	47.42	45.64	45.61
LOC108979199	9.88	8.33	10.94	10.02	10.93	7.73	8.7	9.78	7.87	8.34	8.5	8.33	8.37	8.22	8.23	7.12	7.77	8.47
LOC108979200	0.12	0.34	0.72	0.55	2.34	2.45	6.66	2.42	1.96	0.92	0.99	1.74	0.67	0.84	8.74	12.25	3.4	3.54
LOC108979201	0	0	0	0	0	0.03	0.03	0	0	0	0.06	0.15	0	0	0	0	0	0
LOC108979202	0.09	0	0	0	0	0	0	0	0	0.05	0	0	0	0	0	0	0	0
LOC108979203	0.1	0.1	0.25	0.19	7.38	0.23	0.23	0.42	0.07	0.14	0.06	0.59	0.05	0.48	0.39	0.2	0.15	0.15
LOC108979206	2.3	1.83	2.19	7.15	7.28	5.45	4.03	3.68	2.14	3.43	2.84	2.84	1.84	1.64	4.8	4.43	4.04	2.94
LOC108979207	0.07	0.11	0.09	0.06	0.03	0.06	1.24	0.17	0.27	0.54	0.43	0.19	0.44	0.27	0.76	0.41	1.51	1.19
LOC108979209	26.45	30.37	27.88	45.44	68.2	37.27	34.37	37.23	33.49	45.51	40.33	36.31	46.87	41.38	39.64	31.41	42.16	34.56
LOC108979212	0.87	0.97	1.03	1.06	0.94	1	0.6	1.43	0.25	0.63	1.41	1.26	1.08	1.27	0.45	1.29	0.63	0.57
LOC108979216	29.83	23.24	25.94	35.72	25.75	35.86	23.12	25.17	32.07	30.7	28.72	33.34	33.24	30.12	31.44	23.11	25.23	25.93
LOC108979219	1.61	1	0.74	1.64	1.5	1.24	4.19	1.02	2.13	2.06	2.82	0.61	1.87	0.9	1.8	4.95	1.95	3.59
LOC108979221	4.49	5.38	4.61	4.83	4.32	4.96	5.71	4.62	5.18	4.4	4.74	5.67	3.11	3.09	5.69	3.23	4.64	3.3
LOC108979224	0	0	0	0	0	0	0	0	0	0	0	0.1	0	0	0	0	0	0
LOC108979225	0	0	0	2.86	13.74	0.3	121.71	0.31	31.49	10.84	2.99	0.28	1.43	2.2	31.06	7.67	27.02	25.5
LOC108979226	0	0	0.04	0	0	0	0	0	0	0	0	0	0	0	0	0	0	0
LOC108979228	70.59	71.91	70.56	203.95	269.75	161.21	187.88	86.87	158.5	104.78	91.48	102.04	106.4	82.39	217.84	91.59	135.19	155.23
LOC108979229	4.07	8.39	6.22	8.44	5.18	6.28	15.16	7.65	15.49	18.18	22.31	17.36	7.1	8.67	15.02	7.43	18.6	15.35
LOC108979230	21.7	15.46	23.63	14.53	11.41	15.53	8.84	13.17	7.84	15.09	15.68	15.14	11.61	17.64	7.67	12.26	9.04	10.5
LOC108979232	37.83	29.87	38.23	70.57	65.5	41.74	39.42	47.76	66.18	31.97	34.48	23.64	29.84	28.07	53.65	46.85	45.51	59.04
LOC108979233	16.96	21.18	18	30.32	20.48	18.62	61.77	23.89	48.51	25.47	21.1	18.35	21.99	22.75	57.52	23.81	72.8	54.12
LOC108979234	37.97	49.89	38.71	47.98	45.11	44.23	93.39	103.88	142.87	59.32	34.45	38.95	71.88	55.65	117.32	44.07	35.89	37.46
LOC108979235	0.04	0	0	0	0.04	0	0	0.04	0	0	0	0	0	0.2	0.09	0	0	0
LOC108979236	0	0	0	0	0	0.03	0	0	0	0	0	0	0.02	0	0	0	0	0
LOC108979237	0.62	0.25	0	0.25	0.91	0.5	0	1.14	0.13	0.81	0.36	0.35	0.59	0.93	0.51	0.36	0.26	0.38
LOC108979238	5.3	5.51	4.49	13.76	14.48	8.86	34.01	8.04	16.82	26.73	9.63	8.52	11.98	14.66	34.69	10.56	54.72	45.47
LOC108979239	0	0	0	0.02	0.2	0.17	0.15	0	0.43	0	0.06	0	0.04	0	0.91	2.73	0.24	1.58
LOC108979240	24.06	30.66	25.68	26.28	28.17	22.92	19.12	23.26	22.33	33.1	28.5	22.6	21.51	21.62	27.04	16.79	31.21	25.55
LOC108979244	1.13	2.77	1.55	4.33	6.88	1.07	1.97	2.77	2.68	4.96	1.44	4.21	1.79	5.86	6.86	0.48	11.8	8.82
LOC108979246	4.07	4.18	4.67	4.95	6.22	5.51	6.67	5.6	4.34	4.32	5.42	5.45	4.77	6.18	6.47	4.04	5.52	4.14
LOC108979247	5	5.22	5.47	4.8	4.59	4.34	8.97	6.22	4.51	6.82	6.45	7.14	6.59	5.65	7.24	3.85	5.36	4.5
LOC108979248	2.82	2.4	1.76	3.46	2.25	4.26	0.59	1.77	1.13	2.92	2.67	4.05	2.91	2.86	0.88	1.38	1.17	2.42
LOC108979249	0.13	0.2	0.03	0.83	2.15	0.77	11.76	0.48	1.89	6.08	0.85	0.09	4.09	2.49	12.63	3.4	14.2	10
LOC108979250	0.75	2	0.49	1.5	0.61	2.12	0.65	1.42	1.12	1.86	0.83	2.35	1.77	1.61	0.78	0.94	1.46	1.19
LOC108979251	5.63	11.39	6.25	3.04	8.82	28.49	22.2	16.12	13.56	33.55	35.04	36.88	20.12	21.17	20.66	24.71	7.64	24.4
LOC108979252	0.14	0	0.06	1.99	4.91	4.71	1.2	0.11	3.79	5.19	0.58	0.02	0	0	3.45	0.42	0.45	0.23
LOC108979253	0.48	0.54	0.41	4.49	2.36	1.99	3.97	4.72	10.22	15.74	3.36	3.96	9.05	4.4	35.08	5.05	27.48	5.83
LOC108979255	2.79	2.15	1.38	2.72	2.49	4.58	2.39	2.91	2.98	8.4	4.12	6.45	7.06	4.95	3.87	2.83	2.05	1.35
LOC108979256	2.45	2.08	2.28	1.41	2.19	1.26	3.18	2.23	2.41	2.45	3.09	1.43	3.34	1.85	3.52	2.13	3	3.25
LOC108979257	14.19	10.16	14.78	42.11	25.16	38.48	11.07	34.96	18.44	41.75	26.37	48.08	58.94	52.79	30.07	18.52	15.77	12.38
LOC108979260	4.46	3.98	4.74	6.37	12.63	6.28	7.01	11.04	7.79	8.03	4.86	11.27	19.24	11.18	14.37	4.36	3.85	4.59
LOC108979263	1.81	7.65	7.31	0.94	0.23	11.31	1.88	2.08	0.07	2.38	0.92	0.2	0.55	1.09	0	2.41	0.23	0.67
LOC108979264	14.85	11.58	14.3	11.62	14.38	12.03	12.05	12.25	11.31	14.21	13.56	14.39	11.4	10.16	10.06	11.38	12.69	12.6
LOC108979265	150.92	79.7	241.35	81.12	248.34	358.94	308.7	259.43	304.27	163.63	114.25	141.63	130.6	247.95	390.91	353.09	170.01	132.39
LOC108979266	4.02	7.51	6.04	2.08	0.98	5.77	2.98	2.5	2.07	6.28	3.56	5.58	4.59	4.41	0.97	2.65	3.05	1.99
LOC108979267	0.42	1.6	0.48	0.39	0.93	0.27	3.52	1.16	1.66	5.65	0.38	0.71	0.87	1.5	2.43	0.86	9.63	5.32
LOC108979269	2.79	1.6	2.18	2.83	4.89	1.12	2.05	1.6	1.01	1.98	2.98	2.03	0.86	1.13	1.89	1.62	0.44	0.73
LOC108979273	0	0.1	0.03	0.06	0.23	0.19	1.87	0.16	2.08	0.9	1.51	0.12	0.09	0.12	2.86	1.27	0.59	0.78
LOC108979275	0.48	1.14	0.46	4.6	21.76	1.71	18.4	1.56	15.54	2.82	1.49	0.08	0.58	0.49	28.1	24.07	9.05	18.58
LOC108979278	48.47	40.37	52.25	49.21	60.84	60.05	37.52	44.87	40.53	42.36	42.4	52.22	48.87	53.98	45.14	57.62	33.99	43.17
LOC108979279	218.96	110.98	196.97	172.02	111.32	112.53	63.71	110.85	82.28	117.75	303.38	88.16	81.18	87.49	78.71	361.11	150.42	240.06
LOC108979282	2.38	3.24	2.71	1.91	2.92	2.09	2.9	4.72	2.54	4.88	4.65	5.32	2.66	4.46	2.77	2.39	2.65	2.21
LOC108979283	6.38	4.26	7.34	5.6	5.87	2.17	2.24	7.61	3.86	3.43	11.28	10.53	18.86	7.91	4.91	6.98	2.31	4.5
LOC108979284	0.53	0.21	0.4	0.41	0.78	0	0.04	0.5	0	0.04	0.2	0.81	0.31	0.08	0.38	0.76	0.13	0.08
LOC108979285	19.27	13.6	13.79	10	46.01	14.23	4.44	7.31	5.17	13.27	10.42	13.87	17.25	12.44	8.47	7.16	3.97	8.31
LOC108979286	2.37	2.46	2.68	3.86	3.09	3.71	6.5	3.99	3.73	4.66	3.98	5.95	3.35	5.41	4.09	2.94	5.29	4.79
LOC108979287	9.39	12.95	9.36	5.17	7.27	5.44	5.67	7.76	5.65	3.85	4.94	6.16	16.05	7.74	7.21	9.23	5.3	5.85
LOC108979288	2.33	1.4	3.01	1.19	2.51	2.33	2.31	3.46	1.71	1.83	1.36	1.9	3.29	4.55	1.67	1.59	1.82	1.54
LOC108979290	0.95	1.44	2.08	1.9	1.01	1.68	6.45	2.93	4.17	4.45	4.43	5.36	4.34	5.62	2.73	1.86	6.69	6.62
LOC108979291	15.11	18.93	12.03	15.29	22.77	19.8	38.49	14.3	44.82	42.16	18.82	22.44	13.04	17.16	37.83	24.29	38.74	37.78
LOC108979292	17.11	21.5	16.36	19.4	22.63	14.36	23.54	21.03	19.33	20.33	21.62	29.03	32.06	20.81	25.24	15.76	22.96	23.69
LOC108979293	30.39	36.09	31.05	35.42	34.95	29.72	41.5	34.07	42.09	41.03	35.64	36.9	39.15	35.21	41.26	36.69	33.4	41.21
LOC108979296	25.34	25.39	27.39	20.45	21.2	14.88	18.21	26.47	19.92	23.52	23.03	26.43	33.07	27.89	19.53	20.19	20.71	21.03
LOC108979297	11.91	8.95	9.88	9.46	10.88	12.56	18.71	12.84	14.56	18.06	16.57	16.58	13.13	16.81	19.34	23.28	18.22	19.73
LOC108979300	0	0	0	0.24	41.92	0.36	0.62	0.18	2.51	0	0	0	0	0	2.04	0.7	0	0
LOC108979303	8.73	7.96	6.14	1.95	1.61	1.28	0.4	2.33	0.39	1.39	0.99	2.13	4.72	4.23	1.12	0.25	2.37	0.65
LOC108979304	0	0	0	0	0	0	0	0	0	0	0	0	0	0	0	0.04	0.08	0.08
LOC108979305	1.2	2.36	1.72	0.46	0.54	0.58	17.54	2.17	4.99	8.9	0.39	1.02	4.92	1.72	8.38	0.61	16.08	12.16
LOC108979307	100.01	80.66	88.9	26.77	26.56	46.12	12.33	30.41	21	8.39	3.91	11.84	36.81	20.77	11.01	47.44	16.21	13.18
LOC108979308	0.41	0.36	1.01	0.21	0.97	0.3	0.35	0.56	0.36	0.21	0.08	0.53	0.16	0.84	0.2	0.25	0.39	0.41
LOC108979309	0.32	0.28	0.25	0.89	2.47	0.77	2.6	0.92	1.17	0.73	1.16	0.7	1.18	0.49	2.67	1.05	0.74	1.04
LOC108979311	6.61	6.19	6.91	7.82	4.93	6.41	9.28	6.3	8.9	9.09	11.41	7.35	3.6	3.87	7.95	6.1	7.92	8.73
LOC108979312	0.06	0.09	0.02	0.05	0.03	0.02	0.1	0.08	0.11	0.05	0.05	0.01	0.06	0	0	0	0	0.02
LOC108979315	15	11.08	16.94	33.19	22.98	37.03	24.4	20.39	27.24	48.04	97.5	39.18	12.54	20.52	32.91	48.36	18.98	38.88
LOC108979320	0.39	0.06	0	0	0.07	0.07	0	0.26	0.13	0.14	0.19	0.24	0.06	0.12	0.27	0	0.07	0.2
LOC108979322	0	0	0	0	0	0.17	0.18	0.03	0.87	0	0	0	0	0.03	0.09	0.33	0	0.03
LOC108979323	0	0	0	0	0	0	0	0	0	0	0.05	0	0	0	0	0	0	0
LOC108979324	2.53	3.72	2.15	5.22	6.11	5.22	9.8	5.57	9.39	4.16	5.01	3.31	4.9	5.65	10.1	3.46	5.84	4.87
LOC108979326	0.04	0.02	0	0.08	0.18	0	0.15	0.02	0.02	0.11	0.12	0.04	0.04	0	0.09	0.06	0.06	0.04
LOC108979327	27.86	4.84	30.85	15.69	25.26	23.82	2.11	33.87	13.38	13.52	24.87	55.32	20.63	60.32	10.02	5.99	2.65	28.76
LOC108979329	1.83	1.5	1.03	0.67	0.76	0	0.1	0.79	0.59	0.21	0.75	1.53	0.51	1.18	0.3	0.33	0.55	0.2
LOC108979334	0.25	0.32	0.03	0	0	0	0.07	0.15	0	0	0.03	0	0.65	0.1	0	0.17	0.11	0
LOC108979335	0.13	0.86	0.03	0.01	0.09	0.12	0.16	0	0.07	0.14	0	0.02	0.01	0.02	0.21	0.08	0.36	0.42
LOC108979336	18.3	14.55	16.33	16.53	18.01	18.29	14.43	18.67	17.21	18.25	23.06	18.82	12.87	16.65	16	18.84	11.75	12.62
LOC108979337	7.44	6.61	7.59	8.49	7.09	7.11	10.03	9.53	8.33	10.23	9.43	8.09	7.15	7.81	8.11	8.46	6.49	5.92
LOC108979338	54.13	49.38	60.27	60.15	64.9	76.17	47.12	50.58	48.77	49.68	39.97	61.3	52.48	64.04	54.65	44.92	37.6	42.14
LOC108979339	14.03	121.2	17.49	8.58	7.05	11.11	108.46	116.1	51.84	72.22	34.45	18.11	81.43	51.02	37.3	80.24	33.09	41.31
LOC108979340	5.56	7.48	4.59	2.33	3.46	0.89	0.81	3.41	1.76	2.68	3.92	3.5	5.12	3.57	1.35	2.34	0.59	1.34
LOC108979341	0.07	0	0	0	0	0	0.07	0	0	0	0.2	0	0.06	0	0.21	0.33	0	0
LOC108979342	10.27	13.04	9.16	4.94	5.51	2.16	2.23	8.42	3.45	1.64	3.54	5.67	7.48	7.02	3.87	3.69	3.47	2.38
LOC108979343	0	0	0	0	0.1	0	0	0.1	0	0	0	0	0	0	0.2	0	0	0
LOC108979344	26.75	28.25	29.8	42.58	43.34	66.47	29.91	77.73	57.48	70.85	50.55	31.01	77.02	35.87	129.83	135.43	307.49	125.94
LOC108979345	2.14	2.91	2.49	3.01	1.08	2.46	1.86	4.74	1.97	4.22	4.6	6.16	2.12	2.26	2.23	1.11	3.92	3.11
LOC108979346	9.45	8.15	9.76	21.44	22.08	17.24	27.21	13.64	24.66	16.45	12.32	13.65	11.38	9.02	27.87	19.15	17.27	16.32
LOC108979347	0	0	0	0.18	0.89	0.61	13.53	0.19	1.66	1.92	3.26	0.13	0.09	0.45	5.31	1.56	1.85	2.99
LOC108979349	0.18	0.19	1.25	0.14	0.39	0.84	0.91	0.61	0.43	1.11	0.54	0.48	0.26	0.91	0.24	0.09	0.05	0
LOC108979350	9.46	10.53	9.63	8.53	6.61	8.14	10.84	12.95	9.61	9.21	9.27	7.79	14.22	12.26	8.4	9.45	7.87	11.05
LOC108979351	0.19	0.73	0.52	0.14	0.92	0.34	1.46	0.55	2.39	2.39	0.28	0.68	2.69	4.38	2.73	10.47	4.99	1.89
LOC108979352	10.15	230.64	7.53	2.44	4.82	8.74	40.68	30.63	17.49	3.94	1.56	0.96	2.95	3.92	9.98	53.96	13.34	15.25
LOC108979354	43.42	37.72	41.2	35.38	26.87	28.91	29.49	50.12	20.44	30.86	38.3	36.8	16.75	34.13	22.03	23.56	28.37	25.96
LOC108979355	28.27	40.64	32.31	52.66	40.43	41.31	22.85	37.67	39.77	27.75	34.71	33.89	26.25	28.94	43.18	40.97	37.36	30.91
LOC108979356	8.55	4.99	6.85	10.81	5.29	15.17	18.27	7.28	10.83	28.2	77.57	32.04	6.26	6.29	18.61	41.85	30.44	50.77
LOC108979357	0	0	0	0	0	0	0	0.05	0	0	0	0	0	0	0.05	0	0	0
LOC108979359	0.75	0.42	0.46	0.99	0.46	1.73	2.26	1.49	0.89	1.4	0.81	1.69	0.7	1.06	1.28	0.39	1.3	1.15
LOC108979360	24.44	21.98	25.64	26.04	23.08	37.83	10.2	35.49	21.89	51.61	64.32	41.35	84.95	38.07	16.04	64.49	6.69	21.31
LOC108979361	5.81	7.08	3.41	1.29	0.75	0.97	0.7	5.83	0.99	3.17	1.8	5.45	9.25	5.24	1.61	0.57	0	0.26
LOC108979362	6.39	11.3	9.59	22.65	26.51	19.2	24.56	10.05	23.69	12.16	11.13	13.38	13.6	12.72	23.38	12.43	22.6	18.56
LOC108979363	0.14	0.64	0.13	0.16	0.65	0.16	0.05	0.49	0.05	0.05	0	0.21	0.67	0.41	0.19	0	0.14	0.19
LOC108979365	15.77	13.32	15.07	17.81	18.46	17.53	12.98	14.38	12.59	16.41	17.6	18.63	10.68	13.94	12.36	12.74	12.01	11.69
LOC108979366	0	0	0	0	0	0.03	0	0	0	0	0	0	0	0	0	0.07	0	0
LOC108979367	54.61	31.65	56.92	56.99	68.97	79	97.29	64.55	62.6	57.92	71.45	68.7	29.23	55.35	65.79	120.55	52.33	52.59
LOC108979368	7.83	6.65	9.36	2.21	2.21	4.4	1.75	7.35	2.15	4.37	2.85	6.16	6.25	8.53	2.31	4.76	2.15	2.31
LOC108979369	15.78	12.5	16.12	12.91	8.7	21.69	10.99	18.65	14.09	14.32	13.18	14.36	19.37	15	12.22	16.98	13.95	16.66
LOC108979370	0.31	0.27	0.18	0.42	0.58	0.12	0	0.31	0.05	0.24	0.3	0.53	0.18	0.34	0.04	0.03	0.04	0.05
LOC108979371	2.25	3.38	2.8	2.71	4.19	4.35	12.28	4.83	7.65	7.33	8.2	5.73	3.61	7.49	10.09	10.52	5.14	5.52
LOC108979372	17.92	16.25	16.43	25.49	20.55	20.22	25.69	17.52	24.53	28.41	19.3	21.72	22.24	17.95	25.93	20.84	28.72	25.93
LOC108979373	0	0	0	0	0	0	0.05	0	0	0.1	0	0	0	0	0	0	0.32	0.18
LOC108979375	1.55	2.73	1.31	0.72	0.47	2.45	0.59	1.71	0.56	1.26	0.53	0.38	1.29	1.53	0.08	0.84	0.61	0.29
LOC108979376	1.4	1.59	1.18	1.26	1.01	1.41	1.81	1.97	1.18	2.15	2.75	1.88	1.35	1.46	0.79	1.06	2.05	1.13
LOC108979377	0	0.02	0	0	0.02	0	0	0	0	0.08	0.02	0	0	0	0	0	0.02	0
LOC108979378	1.65	2.05	1.13	1.89	1.75	0.74	2.85	3.42	2.28	7.94	2.58	3.46	2.15	3.54	1.79	0.58	8.19	6.94
LOC108979379	14.81	13.17	13.75	27.48	24.65	19.48	25.04	27.52	27.17	40.35	32.85	34.76	23.7	22.18	25.67	11.6	30.61	30.33
LOC108979380	20.76	18.64	22.96	20.69	18.16	20.59	17.39	21.57	18.2	21.05	22.5	22.15	18.1	17.52	17.76	19.72	18.1	19.86
LOC108979381	0	0	0.21	0	0	0.07	0.15	0	0	0	0	0.27	0.14	0	0.15	0.07	0	0.15
LOC108979382	22.04	20.07	22.66	13.41	11.61	14.04	12.34	17.14	11.11	20.21	24.87	19.84	16.49	20.47	9.47	16.16	11.7	14.79
LOC108979384	0.55	0.37	0.59	1.19	2.18	1.33	1.19	1.25	1.18	1.39	1.56	0.95	0.6	1.14	1.99	0.87	1	0.68
LOC108979385	30.24	35.01	33.04	38.36	47.36	41.25	47.25	44.04	55.41	33.13	27.93	30.7	56.37	42.16	51.73	28.78	28.82	34.24
LOC108979386	3.86	5.69	4.01	8.41	11.55	8.55	9.03	4.85	6.52	7.46	9.2	4.65	5.59	4.68	8.79	8.21	7.42	8.76
LOC108979387	15.52	15.45	13.87	38.44	32.78	36.43	21.93	22.32	36.92	23.42	24.07	17.9	18.94	17.94	33.07	17.57	21.45	17.58
LOC108979388	4.95	5.56	5.41	11.91	12.16	9.86	16.25	9.49	14.9	12.71	6.62	8.14	5.83	7.25	17.85	5.21	16.33	10.04
LOC108979389	1.02	0.76	0.75	0.59	0.41	0.65	0.6	0.72	0.33	3.11	0.9	0.69	3.16	3.58	7.54	4.13	9	7.54
LOC108979393	3.65	4	3.79	6.72	4.97	5.33	6.95	5.94	6.72	10.81	6.5	6.94	8.59	5.91	7.29	4.21	6.94	7.2
LOC108979394	14.14	9.06	11.9	9.02	8.52	11.27	4.27	10.53	3.88	9.41	8.12	8.66	11.91	8.13	3.44	4.47	3.23	4.9
LOC108979395	0.36	0.06	0.7	0.36	0.82	0.98	1.1	1.11	0.97	1.64	1.47	1.12	1.28	0.94	1.04	1.33	1.24	1.17
LOC108979396	105.19	85.61	84.1	102.04	43.77	81.97	214.92	78.3	157.86	203.41	113.11	140.33	234.53	177.79	142.27	78.04	232.35	192.82
LOC108979402	0	0.22	0.13	0.17	0	0	0.23	0.4	0.4	0.1	0.04	0.04	0.71	0.12	0.45	0.64	1.09	0.36
LOC108979403	1.07	0.76	1.08	0.41	0.48	0.37	0.09	0.35	0.11	0.4	0.34	0.3	0.33	0.36	0.04	0	0.07	0.07
LOC108979405	38.04	47.68	44.97	38.86	43.51	33.46	24.98	37.13	27.42	36.71	40.51	47.02	67.82	43.48	32.42	30.16	31.39	37.5
LOC108979408	26.24	61.57	51.19	12.05	8.99	44.07	13.59	27.88	14.49	28.08	4.38	19.03	136.85	72.96	6.57	18.06	13.8	14.93
LOC108979418	0.21	0.04	0.3	0.76	2.44	1.37	0.54	0.35	0.47	0.31	0.04	0.36	0.11	0.43	1.21	0.19	0.46	0.26
LOC108979429	3.29	4.72	2.62	1.86	2.07	1.03	3.46	1.78	2.08	4.3	3.25	3.11	2.59	2.28	6.34	1.55	4.23	3.45
LOC108979433	0.21	0.28	0.21	0.14	0.37	0	0.15	0.07	0.29	0.31	0.34	0.13	0.13	0.53	0.22	0	0.22	0.36
LOC108979435	1.09	1.27	1.31	1.17	0.62	0.17	0.44	1.55	0.69	0.74	0.66	0.32	0.56	0.4	0.88	4.77	0.52	0.87
LOC108979436	6.22	3.11	4.41	2.21	23.22	20.4	35.19	9.05	15.75	6.62	5.25	5.29	3.79	7.23	24.08	21.04	11.84	22
LOC108979437	0.85	0.55	1.02	0.45	1.06	2.06	1.35	1.13	1.23	1.59	0.59	0.42	0.38	0.56	1.09	1.27	0.47	1.23
LOC108979438	0	0	0	1.13	3.49	0.44	75.44	0	17.88	5.05	9.61	0.33	1.58	1.72	16.83	6.03	16.26	52.9
LOC108979442	0	0.17	0	0	0	0	0	0	0	0	0	0	0	0	0	0	0	0
LOC108979445	0	0	0	0	0	0	0.04	0	0	0	0	0	0	0	0	0	0	0
LOC108979448	0.02	0.01	0.05	0.02	0.03	0.02	0.01	0.02	0.02	0.02	0.01	0	0.02	0.01	0.02	0.01	0.01	0.02
LOC108979451	26.24	26.8	29.93	29.03	33.29	27.56	16.78	19.79	20	19.05	25.93	18.73	16.66	19.82	23.79	27.77	17.62	23.92
LOC108979452	2.2	4.29	2.57	6.29	8.03	14.18	2.03	3.65	2.57	2.18	3.56	6.19	1.55	2.46	1.38	1.29	3.13	3.63
LOC108979454	0.12	0.61	0.27	0.36	0.55	0.36	0.33	0.45	0.5	0	0.24	0.41	0.23	0.08	0.21	0.24	0.58	0.45
LOC108979456	0.15	0.04	0.15	0.69	0.73	0.62	0.44	0.16	0.24	0.25	0.26	0.18	0.22	0.51	0.52	0.26	0.48	0.16
LOC108979468	177.76	199.91	203.37	40.65	58.22	212.97	129.76	213.33	69.51	145.97	134.35	183.67	192.55	226.33	112.17	234.97	96.84	116.22
LOC108979469	119.8	116.35	111.8	134.93	129.77	103.7	114.46	114.42	108.36	104.65	88.27	129.26	235.65	172.33	113.86	102.59	125.12	146.43
LOC108979471	0.24	0.48	0.46	0.35	0.92	0.28	0.2	0.36	0.81	0.48	0.27	0.29	0.19	0.48	0.37	0.54	0.45	0.04
LOC108979472	0.28	0.56	0.33	0.27	0.29	0.14	0.5	0.42	0.21	0.3	0.61	0.52	0.4	0.39	0.29	0.34	0.5	0.35
LOC108979473	17.22	16.39	14.29	37.6	33.96	37.15	62.73	35.4	75.43	44.99	25.85	24.89	19.57	24.09	43.08	39.68	35.32	26.96
LOC108979474	12.18	13.23	10.75	13.98	13.3	10.91	21.6	19.36	20.9	18.86	14.32	14.19	15.03	15.73	21.09	12.51	11.7	12.66
LOC108979475	29.42	27.61	31.06	43.58	41.81	44.95	25.76	30.59	33.1	33.52	13.12	21.52	33.99	21.79	30.07	31.53	45.77	31.1
LOC108979476	0.42	0.42	0.66	1.19	3.25	1.26	3.96	2.51	3.75	1.43	1.53	0.15	1.89	2.7	3.36	7.28	6.44	2.3
LOC108979478	18.91	22.2	23.07	23.54	29.06	28.76	20.18	22.3	21.58	19.34	21.83	22.89	16.04	22.31	25.02	19.81	20.03	19.07
LOC108979479	1.02	1.26	1.14	0.52	0.42	0.55	0.83	1.29	0.77	0.69	0.61	1.72	0.74	1.24	0.85	0.43	0.54	0.3
LOC108979480	113.71	115.46	133.34	114.03	88.84	97.43	107.93	122.11	121.28	156.65	186.17	123.15	153.98	138.43	122.91	176	146.65	164.56
LOC108979482	9.88	8.94	10.05	9.29	8.87	8.71	9.22	9.76	9.55	10.4	13.02	10.62	7.49	9.28	8.74	12.91	7.49	8.81
LOC108979483	7.64	9.53	9.07	3.08	2.96	4.79	4.51	12.08	4.17	5.96	4.52	6.04	12.52	13.72	4.3	5.6	4.01	3.8
LOC108979484	6.2	4.7	5.54	11.61	6.78	11.67	10.37	6.26	6.95	12.72	8.65	8.34	3.96	5.12	5.95	5.02	5.24	5.51
LOC108979485	189.35	189.13	202.98	231.36	280.11	217.49	317.53	221.31	293.31	238.99	236.81	234.93	358.61	284.43	251.51	173.89	261.92	315.71
LOC108979486	19.73	19.39	18.47	15.76	13.75	12.7	10.64	15.54	10.41	13.9	19.45	12.46	12.05	13.5	10.48	13.36	11.28	11.98
LOC108979487	19.88	21.43	20.08	35.27	36.4	30.16	31.81	22.91	29.16	21.51	27.89	24.75	22.55	19.62	27.33	17.7	26.16	26.22
LOC108979490	1.45	0.08	0.63	1.94	0.73	3.12	0.2	1.09	0.31	3.77	3.21	1.89	2.48	1.19	0.2	0.26	0.59	2.43
LOC108979492	6.63	6.06	5.05	17.41	12.55	14.86	5.41	9.23	6.7	10.28	6.93	10.77	15.59	10.26	11.42	7.96	8.25	7.83
LOC108979493	0	0	0.04	0	0	0.08	0	0.04	0	0	0.15	0	0	0.07	0	0.08	0	0
LOC108979494	18.6	16.91	20.43	36.03	50.61	38.07	46.46	32.52	45.56	36.02	37.96	24.93	42.34	28.47	58.47	56.91	30.85	37.32
LOC108979495	25.25	22.49	24.31	19.07	24.54	15.85	26.27	32.02	26.74	34.78	32	30.19	26.26	24.59	27.86	26.7	27.37	25.44
LOC108979496	38.16	45.03	36.34	44.87	51.74	39.94	41.01	36.58	39.67	37.01	36.34	45.36	64.65	48.96	44.07	34.66	38.12	39.66
LOC108979498	198.87	846.23	203.31	153.08	187.46	185.01	134.48	222.3	300.49	46.76	76.77	93.81	144.18	176.2	179.59	321.62	172.45	227.91
LOC108979501	18.14	16.18	15.96	19.22	26.96	15.13	18	14.79	14.19	15.21	13.22	19.41	16.34	16.43	26.34	9.57	15	19.26
LOC108979502	24.54	15.38	22.42	15.6	11.19	17.79	6.63	10.12	7.38	8.28	9.49	14.72	8.5	11.16	5.49	9.04	7.88	9
LOC108979503	5.79	5.84	6.66	6.55	8.2	7.51	8.96	5.94	6.07	6.93	6.53	4.19	2.6	3.65	5.21	6.29	5.74	5.4
LOC108979506	0.83	2.24	0.82	0.69	0.64	0.03	0.03	1.46	0.32	0.13	0.28	1.08	0.92	1.29	0.52	0.15	0.27	0.05
LOC108979507	6.85	11.79	7.52	7.06	7.19	5.91	7.97	11.96	8.21	9.28	6.7	9.42	9.85	9.35	12.1	7.71	10.26	9.47
LOC108979508	3.78	4.75	3.6	14.99	15.68	9.54	9.24	6.11	5.67	4.83	3.39	6.4	5.97	7.15	12.38	3.35	8.07	6.78
LOC108979511	0.03	0.03	0.1	0	0.04	0	0.07	0	0	0	0.03	0.12	0.03	0.09	0	0	0	0
LOC108979512	15.37	13.56	16.38	9.2	7.76	12.2	11.01	11.96	10.71	17.04	21.29	16.24	10.42	14.59	10.17	11.14	11.05	12.99
LOC108979513	0	0	0	0	0	0	0	0	0	0	0	0	0	0	0.09	0	0	0
LOC108979514	0.4	0.8	0.16	0.26	0.28	0.03	0.38	0.34	0.58	0.29	0.23	0.68	0.44	0.75	0.52	0.36	0.38	0.03
LOC108979516	25.69	53.69	29.47	5.86	14.54	3.77	11.34	20.7	19.33	14.5	3.49	16.79	18.2	14.26	24.1	15.87	23.69	10.57
LOC108979521	0	0	0.03	0	0.05	0	0	0	0	0.02	0	0	0	0	0	0.02	0	0
LOC108979524	30.25	26.44	27.77	37.13	31.02	30.65	28.63	35.03	33.46	32.38	36.95	35.49	29.35	31.19	33.72	25.98	35	30.44
LOC108979533	7.03	6.46	7.78	7.85	6.57	8.56	8.33	6.29	5.91	10.38	5.88	8.26	5.11	8.27	8.73	3.69	8.35	8.49
LOC108979537	5.1	3.51	6.43	6.11	7.78	6.94	2.98	3.84	3.6	4.66	5.57	6.28	4.08	4.62	3.84	2.11	3.46	3.77
LOC108979540	2.52	1.03	2.61	1.36	1.13	3.4	1.42	1.62	0.57	1.97	1.67	2.32	2.41	2.74	0.22	1.17	0.27	0.7
LOC108979541	0	0	0	0	0	0	0	0	0.15	0	0.14	0	0.14	0	0	0	0	0
LOC108979542	44.55	51.54	46.17	50.59	42.31	40.55	79.37	51.01	81.51	63.97	79.01	50.42	81.65	61.07	65.02	110.18	94.08	100.29
LOC108979543	0	0.72	0.46	0	0.05	0.33	0	0	0	0	0.05	0	0.09	0.18	0	0	0.15	0
LOC108979544	0.12	0.09	0.04	0.04	0.27	0.03	0.12	0.03	0	0	0.01	0.07	0.03	0.06	0.03	0.12	0.03	0
LOC108979545	0	0	0	0.37	29.36	1.49	0.96	0.57	3.41	0	0	0	0	0	1.58	0.59	0	0
LOC108979546	0	0	0	0	0.36	0.38	2.34	0.5	8.02	0.15	0	0	0	0.13	7.08	1.99	1	1.92
LOC108979550	0	0	0	0	0	0	0.04	0	0	0	0	0	0	0	0	0	0	0.02
LOC108979551	0	0	0	0	0.03	0.15	0.28	0.03	0.03	0.1	0.18	0	0.09	0.03	0.25	0.92	0	0.19
LOC108979552	43.76	29.61	38.66	31.21	29.78	36.34	12.12	30.08	17.67	26.45	36.61	32.96	33.42	30.01	20.03	45	14.23	22.76
LOC108979554	10.28	11.34	12.32	7.27	9.18	8.96	13.87	14.03	10.1	11.41	12.8	9.24	10.82	13.62	11.89	14.69	12.53	12.5
LOC108979555	14.17	13.07	14.62	20.17	17.56	19.77	19.68	13.03	13.36	16.49	17.07	16.25	14.76	13.33	14.06	13.86	14.32	15.62
LOC108979556	12.94	10.09	11.06	17.01	13.75	17.13	15.49	16.05	17.34	43.01	55.49	52.3	14.26	22.01	28.31	13.22	13.92	14.21
LOC108979557	5.94	6.51	7.14	6.51	8.18	5.12	3.89	8.2	5.98	6.05	4.83	5.15	5.63	7.9	4.72	3.98	6.41	5
LOC108979560	14.88	8.02	11.61	30.88	28.81	22.73	41.86	12.82	26.32	19.83	13.69	11.57	10.05	11.91	31.09	16.64	35.16	27.36
LOC108979561	3.62	2.94	3.21	5.1	5.78	3.8	6.97	9.35	6.85	14.36	13.11	16.01	22.14	14.9	15.47	4.89	3.32	3.96
LOC108979567	13.67	19.11	16.19	23	25.24	16.12	22.28	13.91	17.8	13.38	16.26	16.14	15.56	13.83	20.56	14.78	15.22	15.35
LOC108979568	1.63	1.74	2.14	1.47	1.05	0.45	0.53	1.38	0.76	1.05	1.06	1.44	1.71	1.87	1.43	1.06	0.83	2.3
LOC108979570	4.27	3.9	4.67	3.01	2.9	3.56	2.46	3.81	1.9	3.64	3.06	3.78	2.91	3.59	2.14	2.78	1.7	2.17
LOC108979572	4.81	2.55	4.55	4.79	4.3	3.99	5.18	3.64	3.23	6.11	5.64	3.94	4.44	3.07	4.38	3.73	4.27	4.48
LOC108979573	36.76	40.73	34.51	32.74	31.54	27.62	14.3	34.16	24.96	32.88	41.34	44.58	52.22	41.99	23.34	30.65	21.28	32.04
LOC108979575	0.55	0.33	0.25	0.97	1.17	1.25	3.32	0.53	0.7	0.93	0.64	0.64	0.31	0.4	1.25	1.11	1.55	2.24
LOC108979577	6.8	7.34	7.11	17.94	15.47	13.73	7.45	7.14	7.87	5.1	5.19	7.86	6.6	5.47	9.34	6.47	6.28	5.43
LOC108979587	6.28	7.72	6.1	6.79	5.41	6.22	11.83	6.02	8.26	12.38	6	9.11	7.53	7.59	8.83	4.56	15.04	10.41
LOC108979588	1.53	2.56	2.32	1.74	1.88	0.93	2.03	2.96	3.11	2.73	2.42	1.76	2.18	1.79	2.97	1.74	2.11	2.48
LOC108979589	43.85	24.73	36.91	105.12	104.66	137.39	56.59	45.62	65.41	56.7	55.81	90.37	24.89	36.17	81.71	45.36	60.54	87.32
LOC108979594	0.05	0.21	0.59	0.13	5.29	0.04	1.72	0.81	1.03	0.23	0.18	0.36	0.16	1.18	3.06	1.5	0.36	0.95
LOC108979597	6.74	10.89	6.4	7.36	10.42	6.08	12.35	10.84	8.83	11.17	8.21	12.08	10.55	9.14	8.81	5.19	9.17	13.43
LOC108979598	0	0.03	0	0	0.09	0.12	0.25	0	0.03	0.42	0.06	0	0.11	0	0.49	0.06	0.83	0.46
LOC108979599	0	0	0	0	0	0	0	0	0	0	0	0	0	0.03	0	0.24	0	0
LOC108979602	17.82	18.29	28.27	7.99	13.78	33.56	12.97	23.69	14.26	15.09	10	18.23	21.41	21.65	16.65	31.28	14.74	16.06
LOC108979603	66.81	39.51	54.74	20.7	43.22	100.9	80.82	56.46	49.99	40.65	37.21	36.63	29.27	44.5	58.13	121.76	35.75	44.2
LOC108979604	14.28	12.1	15.69	9.98	10.03	9.85	8.58	10.37	9.5	10.83	11.42	10.6	13.16	9.58	8.9	14.83	10.05	12.6
LOC108979605	2.94	1.1	2.49	3.05	1.34	1.59	2.5	1.47	1.48	3.52	2.55	1.7	0.71	1.07	1.85	0.67	3.18	1.76
LOC108979606	5.12	9.03	4.85	7.65	12.89	8.99	11.09	6.25	6.7	11.16	3.53	11.93	6.59	5.42	12.8	3.64	12.78	14.43
LOC108979608	7.83	5.58	7.19	5.16	5.98	7.05	3.69	6.28	3.46	5.23	5.76	7.83	6.48	4.56	3.86	5.24	3	3.27
LOC108979612	0.02	0	0	0	0.08	0	0.03	0	0	0.03	0	0	0.05	0	0	0	0	0
LOC108979616	0	0	0	0	0	0	0	0	0	0	0	0	0	0	0.04	0.02	0.14	0.37
LOC108979617	45.82	47.74	65.56	11.48	13.91	14.28	51.46	50.05	94.02	82.91	36.82	53.07	34.76	61.13	78.03	9.71	63.04	47.45
LOC108979621	0	0	0	0	0	0	0	0	0	0	0	0.41	0	0	0	0	0	0
LOC108979624	27.77	57.89	31.69	20.34	23.44	18.68	46.01	31.1	40.03	25.97	16.75	32.27	12.29	19.16	36.1	14.74	43.52	24.65
LOC108979625	6.05	7.3	6.28	8.54	9.97	8.43	5.47	5.85	6.09	5.97	5.61	6.92	4.84	6.96	7.8	4.82	4.87	4.9
LOC108979629	46.52	62.79	47.09	31.37	21.88	30.7	23.83	44.81	24.9	45.76	24.79	32.83	42.49	40.11	16.08	42.73	41.4	38.3
LOC108979630	0	0	0	0	0	0	0.06	0	0	0.23	0.17	0.06	0	0	0	0	0	0.06
LOC108979631	37.02	49.47	35.68	29.99	23.73	34.29	45.15	53.6	49.19	46.61	51.85	34.27	39.79	42.73	35.28	38.19	30.08	42.63
LOC108979633	0	0	0	0	0	0	0	0	0	0.09	0	0	0	0.04	0	0	0	0
LOC108979635	2.84	1.54	2.57	5.11	2.44	0.78	0.68	4.46	1.8	7.09	6.85	2.91	3.7	3.73	1.29	0.86	3.03	2.77
LOC108979636	0	0	0	0	0	0	0.11	0	0	0	0.13	0	0	0.05	0	0	0.19	0
LOC108979637	0.38	0.31	0.37	0.38	1.05	0.15	3.41	0	1.88	0.25	0.22	0.07	0.36	0.29	3.1	0.45	0.32	1.72
LOC108979639	99.52	234.29	107.1	102.57	85.25	72.25	113.42	256.84	144.12	199.82	131.51	109.57	126.33	221.21	79.71	131.09	113.97	122.77
LOC108979642	0.19	0.04	0.11	0.19	0.04	0	0.08	0.19	0.12	0.21	0.22	0.07	0.33	0.25	0	0	0	0.04
LOC108979643	32.41	29.56	35.72	23.88	16.07	17.37	19.38	22.39	16.53	18.9	42.86	19.78	23.97	20.18	14.79	35.2	15.31	55.3
LOC108979645	10.14	11.87	9.47	6.8	3.88	6.66	4.33	12.11	4.94	15.33	12.23	10.8	12.14	14.08	4.63	5.73	10.01	10.93
LOC108979647	0.5	0.59	0.57	0.33	0.44	1.17	0.26	0.64	0.38	0.68	0.2	0.47	0.24	1.02	0.39	0.45	0.09	0.17
LOC108979651	57.51	44.38	55.76	36.24	28.6	40.09	29.67	25.6	25.27	28.56	36.37	38.47	25.17	33.2	28.03	70.27	24.08	29.1
LOC108979655	4.38	13.82	6.5	3.91	17.2	11.29	10.33	4.61	14.72	1.9	0.23	2.38	14.36	7.72	12.14	4.96	17.75	5.7
LOC108979657	9.38	9.79	9.9	8.43	8.77	8.64	6.8	9.43	8.88	8.45	10.69	10.03	7.22	8.24	8.07	8.94	7.15	6.24
LOC108979658	1.01	1.18	0.88	1.21	2.14	0.09	0.13	1.01	0.89	0.67	0.4	1.44	0.91	1.15	1.01	0.1	1.67	0.97
LOC108979661	6.92	7.39	7.47	7.56	8.34	5.93	7.33	7.83	5.14	9.48	8.27	7.26	10.54	7.96	9.63	5.42	7	4.97
LOC108979663	0.11	0.29	0.61	0.28	0.12	0.63	1.25	0.41	1.29	0.31	0.61	0.27	0.38	0.86	1.25	1	0.36	1.29
LOC108979664	0	0	0	0	0.08	0	0.12	0	0.04	0	0	0	0.07	0	0	0.07	0	0
LOC108979665	0.09	0.51	0.63	0.21	0.37	0.47	1.4	0.46	1.06	0.15	0.12	0.11	0.22	0.2	0.96	0.53	0.31	0.9
LOC108979666	344.25	299.36	347.27	265.45	321.55	348.58	194.36	358.92	254.21	324.63	279.63	480.73	898.99	638.93	240.76	162.57	319.36	400.97
LOC108979668	0	0.07	0	0	0	0	0	0	0	0	0	0	0	0	0	0	0.07	0
LOC108979676	11.52	8.63	9.95	16.85	16.14	15.14	10.02	9.43	7.27	6.78	7.89	13.04	10.18	10.73	9.8	6.61	12.51	10.32
LOC108979677	29.31	42.73	30.42	23.03	23.83	18.97	43.96	24.39	30.5	35.46	38.84	30.98	27.87	31.79	49.14	28.97	51.81	44.6
LOC108979678	9.21	3.97	6.99	3.53	2.71	5.27	1.41	5.7	3.03	11.28	5.88	22.23	6.93	4.5	1.19	7.59	2.54	7.48
LOC108979679	0	0	0.03	0	0.16	0	0.67	0	0.03	0.07	0	0.03	0	0.09	0.06	0.21	0.29	0.09
LOC108979681	0.92	0.17	1.06	0.33	0.13	0.72	2.67	0.04	1.08	0.83	0.62	0.35	0.08	0.87	0.83	1.15	0.61	1.64
LOC108979682	11.38	10.07	11.24	23.93	18.33	16.53	17.08	12.18	16.98	14.91	20.09	14.34	8.23	12.83	16.61	13.04	15.61	12.02
LOC108979684	0.05	0.05	0	0	0.05	0.15	0	0.05	0	0.11	0.09	0.14	0	0	0.05	0	0	0
LOC108979685	0	0	0	0.04	0.22	0	0.04	0	0	0	0	0	0	0	0	0.04	0	0
LOC108979686	98.67	112.14	114.73	89.17	75.15	75.39	83.41	82.4	99.27	89.93	76.11	74.11	88.58	84.02	81.67	76.99	105.3	87.28
LOC108979687	0	0	0.16	16.32	3.15	2.92	0	4.66	8.77	9.53	1.94	0.31	0.63	0	21.8	0.32	10.84	12.6
LOC108979688	4.35	4.03	3.78	1.94	1.69	2.47	0.6	4.56	1.31	9.1	47.6	5.9	4.97	3.34	1.17	3.08	1.4	7.53
LOC108979689	6.1	8.82	5.43	4.42	4.24	7.44	4.62	5.82	4.81	8.77	9.79	5.42	7.61	5.35	3.86	6.79	3.93	7.62
LOC108979690	0.45	0.32	0.25	0.32	0.07	0.13	0	0.46	0.13	0.14	0.31	0.06	0.37	0.18	0	0	0	0
LOC108979693	1.99	3.76	3.05	2.64	8.98	3.05	3.3	3.85	4.49	1.29	3.84	3.1	3.32	3.63	5.89	2	2.05	1.04
LOC108979694	0.02	0.09	0	1.08	4.63	0.33	19.11	1.33	4.56	4.14	0.35	0.15	1.1	1.04	11.16	4.31	13.3	12.34
LOC108979695	9.58	10.27	8.66	8.75	8.58	9.12	7.79	10.58	5.99	7.92	10.13	9.36	7.98	9.77	8.78	6.34	6.27	6.87
LOC108979697	0.36	0.06	0.18	0	0	0.37	0.13	0	0	0	0	0	0	0.29	0	0.3	0	0
LOC108979698	0	0	0	0	0	0	0	0.16	0	0	0.16	0.15	0	0	0	2.79	0	0
LOC108979699	12.27	11.01	11.75	9.76	9.18	10.49	5.7	9.54	6.88	7.07	8.1	8.77	5.64	10.04	6.42	6.87	5.65	5.71
LOC108979701	26.62	28.01	22.71	31.93	36.67	32.8	17.65	24.06	18.58	23.28	20.66	28.39	24.85	28.71	26.3	15.6	20.29	21.5
LOC108979702	12.46	13.88	14.23	14.92	18.39	18.53	17.84	15.94	12.89	12.79	12.39	14.05	12.49	14.41	16.45	22.26	10.3	10.39
LOC108979703	28.68	25.77	25.18	36.91	32.62	36.45	36.42	24.39	32.68	33.83	24.65	37.3	36.58	28.17	41.18	25.7	41.42	34.34
LOC108979704	1.12	1.28	1.24	2.05	1.24	2.1	1.41	2.16	1.2	0.97	2.47	1.85	2.27	2.55	1.17	0.64	0.73	1.31
LOC108979705	0.11	0.8	0.28	0.11	0.15	0.34	0.56	0.44	0.12	0.16	0.17	0.16	0.3	0.64	0.47	0.33	0.09	0.03
LOC108979706	0.07	0	0	0	0.07	0	4.57	0	0.36	0.23	0.07	0	0	0.13	0.74	1.18	0.51	2.98
LOC108979708	19.26	21.18	21.11	11.95	11.61	24.47	14.54	11.82	8.88	14.85	12.49	12.64	10.89	11.93	8.08	15.85	9.62	11.4
LOC108979709	4.11	2.91	3.05	6	6.08	4.44	9	2.75	7.17	5.47	9.41	7.84	4.99	4.51	9.12	5.29	4.39	5.18
LOC108979710	15.62	15.57	16.06	18.16	17.54	16.23	12.74	16.75	12.89	17.23	19.78	17.37	13.67	15.38	14.99	14.62	15.06	15.78
LOC108979711	1.38	2.28	2.78	5.08	3.59	4.2	1.64	6.3	2.04	3.03	1.54	4.68	3.67	5.22	2.84	3.23	2.72	2.1
LOC108979712	3.45	2.14	4.44	2.52	5.72	3.06	2.94	2.37	2.8	4.64	2.04	2.6	4.84	2.26	4	1.3	3.91	4.43
LOC108979713	8.09	7.28	8.18	3.64	5.19	3.88	3.66	6.05	2.32	3.49	2.86	3.42	7.69	5.25	3.94	3.96	2.69	5.05
LOC108979714	216.91	169.12	137.41	87.05	96.43	123.51	76.17	180.88	60.7	116.77	117.43	136.32	165.41	120.47	54.85	252.77	36.59	41.79
LOC108979715	4.35	3.59	4.75	4.92	5.11	3.73	2.66	4.09	2.96	4.08	2.87	3.22	2.35	4.11	2.71	2.04	3.34	2.73
LOC108979718	23.25	26.03	18.11	37.35	31.39	25.9	36.7	26.14	26.12	25.2	25.78	31.64	31.87	23.09	33.39	25.68	37.31	32.79
LOC108979719	1.86	2.16	1.49	3.18	4.91	3.4	20.82	2.17	10.69	17.93	11.03	2.61	5.58	5.28	21.16	20	27.03	26.54
LOC108979720	7.73	6.87	8.01	6.42	8.25	9.96	8.32	7.71	6.6	6.21	6.61	6.59	3.92	7.02	7.62	9.19	6.99	5.97
LOC108979721	52.55	48.31	53.33	55.6	31.97	66.34	24.1	34.6	29.38	25.03	22.99	44.46	35.73	27.99	23.15	25.45	38.75	38.2
LOC108979722	3.4	2.68	2.92	1.97	1.32	2.95	0.85	1.28	1.42	0.99	0.88	2.26	3.62	2.71	0.9	0.55	2.15	1.68
LOC108979723	2.98	3.53	4.08	2.66	2.59	2.87	4.24	3.5	3.92	4.66	4.03	3.81	3.48	3.34	3.28	4.41	3	4.19
LOC108979724	0	0	0	0	0	0.02	0	0	0	0.05	0	0	0.05	0.07	0.05	0	0.15	0.05
LOC108979725	0.54	0.61	0.88	2.37	0.6	1.42	1.4	1.27	0.55	2.06	0.72	1.82	0.58	0.85	1.26	0.23	1.64	0.65
LOC108979726	0	0	0	0	0	0	0.03	0	0	0	0	0	0	0	0	0.12	0	0
LOC108979727	0.39	1.25	2.23	0.46	1.45	5.55	1.16	2.42	0.67	0.07	0.19	2.02	0.38	0.62	1.77	0.38	2.04	2.9
LOC108979728	0	0	0	0	0	0	0.41	0	0	0	0	0	0	0	0.21	0	0.1	0
LOC108979730	12.66	13.8	10.53	9.41	8.97	9.01	6.16	10.98	7.08	8.48	9.39	9.42	8.46	9.8	7.56	8.58	6.52	6.66
LOC108979731	12.02	12.87	10.08	12.71	16.48	12.47	10.53	11.24	9.18	6.98	8.58	10.9	12.62	10.59	11.83	8.93	7.66	9.21
LOC108979732	3.3	2.74	2.41	1.07	1.22	1.29	1.98	1.44	1.19	2.9	1.7	2.01	2.17	1.63	1.59	2.14	1.2	1.95
LOC108979733	227.4	241.91	199.03	240.05	159.29	201.4	225.43	195.9	250.11	260.51	253.77	261.44	315.33	204.73	210.06	172.35	321.91	340.74
LOC108979734	0	0	0	0	0.02	0	0.57	0	0.07	0.19	0.04	0.04	0	0	0.27	0.06	0.14	0.02
LOC108979735	29.03	29.63	28.18	30.66	26.38	29.82	31.46	31.66	31.53	37.68	46.73	40.7	24.28	28.83	25.63	23.84	17.87	23.89
LOC108979736	0	0	0	0.05	0	0	0	0	0	0.05	0.09	0	0	0	0	0	0	0.05
LOC108979737	3.11	1.38	4.89	2.4	6.44	16.84	28.47	6.7	17.98	7.06	6.96	2.54	1.89	3.23	19.88	22.19	8.17	8.19
LOC108979738	11.55	10.22	11.38	13.69	16.03	14.62	9.34	10.52	8.33	10.09	10.83	12.32	10.64	10.83	10.31	10.46	7.68	9.95
LOC108979739	27.48	21.58	28.58	24.13	25.16	29.18	17.13	25.37	19	26.86	31.05	27.25	37.5	30.86	19.59	19.99	16.43	24.17
LOC108979741	23.7	22.2	23.64	19.18	15.01	20.18	9.67	12.23	13.73	13.87	11.37	18.75	20.53	18.86	15.79	15.72	19.64	16.38
LOC108979742	16.36	15.95	13.78	19	18.6	16.71	15.26	17.14	15.5	15.86	17.16	17.9	14.94	14.52	20.56	15.66	19.56	15.1
LOC108979743	3.84	3.73	4.48	4.05	4.55	3.32	6.53	4.39	3.25	3.49	3.98	3.79	3.83	3.37	4.53	3.28	4.11	3.57
LOC108979744	7.88	5.93	6.87	15.35	15.71	12.15	25.94	5.34	7.21	14.74	9.51	9.83	5.64	6.51	17.06	7.58	20.94	18.21
LOC108979749	0.84	1.12	0.78	0.6	0.67	0.52	2.97	0.56	1.16	1.45	0.74	0.35	0.3	0.41	1.45	0.77	1.34	1.29
LOC108979750	14.65	14.82	14	22.61	22.29	19.65	15.89	11.77	14.8	15.91	14.96	14.84	12.27	12.74	18.34	11.09	13.79	13.44
LOC108979752	0.61	0.12	0.99	2.81	25.53	7.47	9.63	1.26	3.03	1.48	4.89	0.58	0.27	1.12	3.58	18.48	4.85	3.03
LOC108979753	0.09	0.21	0.17	0.26	0.28	0.32	0.21	0.18	0.12	0.16	0.06	0.11	0.17	0.08	0.21	0	0.21	0.18
LOC108979756	0.23	0.14	0.13	2.22	0.19	0.14	1.47	4.76	1.31	13.9	4.06	2.09	1.13	1.07	2.94	0.53	12.41	5.01
LOC108979758	3.1	3.4	3.38	3.07	1.73	1.72	2.9	3.71	2.49	3.88	4.08	2.68	2.43	3.04	1.9	2.35	2.79	2.42
LOC108979759	0.62	0.63	0.4	2.15	2.64	1.52	5.09	2.08	8.64	2.37	0.87	1	1.62	1.18	13.22	5.31	4.7	1.77
LOC108979761	1.2	0.83	1.1	0.75	0.54	0.48	0.75	1.3	0.85	3.35	1.38	1.28	2.75	2.94	1.36	3.32	1.21	1.27
LOC108979763	2.77	1.99	2.61	1.99	2.2	3.55	8.34	4.01	8.43	5.59	0.37	3.99	2.17	4.41	7.3	1.97	9.19	8.13
LOC108979764	0.12	0.33	0.09	0.59	0.98	1.23	1.3	1.53	1.01	3.79	2.1	1.87	1.45	1.99	3.69	1.25	2.29	0.58
LOC108979765	0.02	0	0	0	0	0	0.02	0	0	0.13	0	0.06	0	0	0	0	0.02	0.08
LOC108979766	0.09	3.22	0.43	0.35	1.03	0.09	2.31	1.64	1.65	0.39	0.26	0.08	0.68	1.26	1.67	1.56	1.2	0.64
LOC108979767	3.86	3.86	4.15	3.85	5.43	5.48	5.35	3.24	3.51	5.26	6.76	5.51	1.65	2.15	4.32	3.98	3.84	3.93
LOC108979768	0.29	0.32	0.42	1.74	9.15	0.44	0.21	0.54	3.77	1.4	0.17	0.38	0.36	3.06	1.81	0.34	0.63	0.51
LOC108979769	18.53	50.87	16.54	16.43	13.88	17	21.81	33.63	22.16	18.5	14.64	18.13	34.88	22.09	18.17	25.98	18.33	20.15
LOC108979771	0	0	0	0.82	1.24	1.32	1.65	0.21	0.85	2.42	0.74	0.13	0.33	0	9.1	0.94	2.79	5.59
LOC108979772	72.51	74.05	70.34	49.6	44.18	44.36	51.15	71.54	50.41	65.02	68.87	63.73	88.09	86.07	51.13	62.3	65.68	67.22
LOC108979773	7.48	9.99	9.1	5.74	5.11	5.38	6.31	12.85	6.6	12.89	16.02	12.63	11.46	12.84	6.41	7.63	7.99	7.56
LOC108979774	96.76	111.04	107.53	95.72	99.16	73.76	85.41	110.64	91.58	91.68	111.18	116.66	213.92	128.52	110.91	122.33	86.49	105.82
LOC108979775	0.07	0.05	0.17	0.07	0.37	0.13	0.05	0.05	0.15	0.05	0.42	0	0.05	0.05	0.13	0.98	0.44	0.18
LOC108979778	0	0.03	0	0.03	0.04	0.04	0	0	0	0.12	0	0.01	0	0	0.01	0	0	0.01
LOC108979779	4.99	5.93	5.72	4.84	7.17	5.74	5.92	5.86	6.74	5.19	4.76	5.73	4.75	5.17	6.03	5.59	5.64	5.55
LOC108979780	7.01	5.72	7.1	12.28	14.79	14.87	7.86	6.3	7.23	7.64	5.98	7.89	5.33	7.19	9.8	6.49	7.64	7.61
LOC108979781	1.86	1.55	1.56	2.61	2.92	2.26	1.32	1.03	1.31	1.59	1.66	1.67	1.43	1.68	2.53	0.9	1.58	1.16
LOC108979782	10.64	9.57	10.59	4.59	10.63	2.28	2.61	7.69	3.87	5.55	4.5	6.69	5.42	8.13	4.48	4.03	3.58	1.75
LOC108979784	2.31	1.09	2.32	1.66	2.37	2.26	0.53	2.81	0.37	1.59	4.95	3.45	2.28	2.38	1.2	0.85	0.38	1.41
LOC108979786	0.03	0.09	0	0	0	0.06	0	0	0	0	0	0.08	0.03	0	0	0	0	0
LOC108979789	0.38	0.06	0.25	3.71	4.2	5.22	7.75	0.65	1.95	2.35	1.54	0.65	0.42	0.89	4.08	1.17	3.81	6.04
LOC108979790	12.84	8.7	9.29	10.98	7.24	2.97	0.74	4.01	2.41	8.29	13.23	11.16	5.81	3.96	1.36	2.51	2.79	4.52
LOC108979791	19.22	22.99	18.67	44.51	51.08	34.94	33.72	23.32	35.16	25.66	18.39	30.41	28.23	24.8	42.02	18.6	32.8	32.38
LOC108979792	7.02	8.11	7.22	5.15	2.29	3.23	4.52	7.83	4.46	4.76	4.15	8.13	18.19	10.71	7.21	3.03	9.77	3.72
LOC108979793	7.13	5.91	10.56	7.49	10.23	10.19	8.11	7.89	9.62	5	5.72	6.69	3.91	8.17	8.65	7.36	7.26	10.08
LOC108979794	11.11	10.67	11.13	24.79	28.84	24.15	19.77	6.99	10.74	10.5	10.22	10.62	9.16	9.23	15.54	12.46	13.15	15.12
LOC108979796	12.4	13.62	10.6	43.43	29.12	29.08	87.36	34.91	64.25	18.14	29.56	16.98	15.07	12.65	45.19	15.84	28.47	25.85
LOC108979798	11.49	9.54	13.01	15.48	15.6	10.51	14.97	14.74	20	11.37	10.43	10.33	11.44	10.99	22.1	17.61	11.2	9.59
LOC108979799	1.14	0.5	4.35	15.48	19.86	24.22	65.12	11.26	59.03	15.65	10.69	5.38	8.74	14.6	63.85	41.65	38.08	31.58
LOC108979800	0.03	0	0.03	0.1	0.1	0.03	0.43	0.07	0.49	0.88	0	0.03	1.59	0.75	1.53	1.5	3.1	3.1
LOC108979801	16.72	17.51	15.56	20.15	24.33	20.86	16.89	19.09	18.51	16.19	15.88	17.13	18.11	18.77	23.04	13.87	16.83	13.67
LOC108979803	3.38	3.26	3.14	3.19	4.39	2.78	3.55	3.32	4.15	3.91	3.52	4.17	5.68	3.66	4.42	2.67	3.58	2.78
LOC108979804	7.4	10.04	8.15	11.43	6.34	7.94	10.16	9.26	7.53	9.53	11.44	7.98	9.71	8.91	9.54	8.16	9.12	8.46
LOC108979805	2.34	1.24	1.08	1.78	1.69	1.74	3.4	1.51	1.58	1.55	1.63	1.56	2.71	2.2	1.67	2.71	1.73	1.33
LOC108979806	14.72	25.28	21.68	5.32	1.84	17.73	1.55	10.72	1.83	1.22	0.36	1.84	2.98	7.44	0.97	1.67	1.97	2.79
LOC108979807	18.82	9.71	17.65	9.45	15.39	20.44	23.37	16.37	14.23	13.42	8.43	10.92	13.02	11.92	20.28	35.49	9.39	11.29
LOC108979808	8.69	6.35	7.93	4.75	3.62	5.08	2.83	5.21	2.65	3.77	4.53	6.5	8.4	5.58	3.5	4.72	3.6	3.76
LOC108979809	1.23	1.87	1	1.85	2.87	1.06	0.44	1.96	1.14	1.24	1.01	2.1	1.97	2.08	1.31	1.11	0.76	0.34
LOC108979810	2.05	1.58	1.14	1.38	1.24	1.79	0.7	1.61	0.88	1.17	1.19	1.42	1.2	1.53	1.11	0.95	0.74	1.33
LOC108979811	0.04	0.04	0.03	0.07	0.15	0.04	0.04	0.26	0	0.04	0	0	0.17	0.13	0	0	0.07	0
LOC108979812	9.17	3.72	10.04	10.98	31.63	10.68	28.66	2.33	13.43	16.35	15.97	11.13	8.25	4.52	31.93	23.05	5.18	8.17
LOC108979813	12.8	10.07	13.42	11.53	10.64	12.27	10.33	15.28	9.68	19.88	18.18	17.62	17.17	14.58	12.27	9.72	12.15	10.26
LOC108979814	0.22	0.07	0.12	0.05	0.18	0.1	0.08	0.28	0.03	0.63	1.6	0.49	0.14	0.33	0.1	0.58	0	0.28
LOC108979815	4.86	3.24	5.69	3.45	2.86	2.07	4.31	4.49	2.5	2.52	2.78	3.44	4.09	4.28	2.59	3.01	2.08	3.45
LOC108979816	20.15	27.05	17.56	17.83	10.25	17.83	14.16	19.11	17.58	29.43	28.03	34.19	10.81	17.62	11.17	9.12	11.61	9.92
LOC108979817	13.15	13.78	13.06	15.79	10.94	12.45	12.53	18.59	11.53	15.97	19.52	18.29	12.53	18.47	12.24	11.37	12.73	10.5
LOC108979818	5.28	3.52	3.63	2.31	3.35	2.98	1.35	2.1	2.23	3.51	3.04	3.16	2.54	1.85	2.7	2.06	0.72	1.02
LOC108979821	0.05	0	0.1	0	0	0	0.22	0	0	0	0.21	0.05	0.26	0	0	0	0.11	0
LOC108979822	1.36	0.09	0.44	8.07	32.88	27.52	43.76	1.49	37.72	10.28	5.97	2.47	3.22	4.03	31.26	19.03	15.6	25.92
LOC108979823	0	0	0	0	0.12	0	0	0.04	0	0	0	0	0.04	0.18	0	0	0	0
LOC108979828	5.49	6.08	4.03	7.71	7.43	7.61	7.69	6.39	7.68	7.54	8	6.03	6.88	6.55	8.06	5.09	6.77	6.58
LOC108979830	0.28	0.46	0.46	0.14	0.3	0.51	0.33	0.89	0.23	0.61	0.08	1.31	0.09	0.95	0.07	0.25	0.1	0.15
LOC108979832	0.12	0.3	0.12	0.09	0.22	0.3	0.06	0.21	0.09	0.26	0.06	0.06	0.29	0.34	0.56	0	0.12	0.09
LOC108979835	24.66	32.84	29.27	17.58	14	19.86	29.14	25.8	17.24	28.72	19.2	20.18	30.7	26.15	18.01	24.19	17.22	24.22
LOC108979836	4.33	2.27	3.17	4.62	5.14	3.3	3.54	1.86	1.59	3.29	3.37	3.52	2.45	2.58	4.09	1.64	3.31	2.09
LOC108979838	0.51	0.29	0.09	0.42	0.27	0.06	0.54	0.49	0.66	1.66	1.26	0.84	0.8	0.39	2.58	0.22	2.47	1.72
LOC108979841	1.11	1.56	0.95	1.42	3.38	1.72	8.34	2.37	3.62	4.31	3.16	2.11	2.4	2.75	5.9	1.95	8.26	6.06
LOC108979842	0	0	0	0	0	0.04	0.18	0	0	0.19	0	0	0.46	0.29	0.32	0.09	1.65	2
LOC108979852	1.71	1.69	2.49	2.83	6.49	2.06	2.58	3.19	1.41	2.38	1.65	3.09	2.63	2.45	4.01	0.54	2.06	2.67
LOC108979856	3.06	5.64	2.68	0.94	2.14	3.82	30.18	3.62	5.54	25.61	7.97	5.41	21.19	15.42	52.12	24.25	45.48	41.2
LOC108979858	0.24	0.23	0.3	0.21	0.32	0.19	0.43	0.33	0.25	0.23	0.37	0.23	0.36	0.27	0.27	0.34	0.2	0.29
LOC108979861	114.25	88.42	89.62	58.32	38.7	88.91	189.97	90.43	91.59	175.47	322.92	220.19	59.42	101.06	93.18	107.08	111.35	164.17
LOC108979862	13.27	13.99	14.64	20.24	19.33	20.85	15.09	13.91	11.71	15.57	21.16	21.05	15.21	13.99	14.78	11.76	14.45	16.45
LOC108979864	0	0	0	0	0.13	0	0.17	0.06	0.02	0	0	0	0	0.02	0	0.04	0	0
LOC108979865	6.11	6.39	5.8	6.1	10.94	6.49	7.45	7.28	6.97	10.73	8.47	6.79	7.44	7.63	8.03	5.77	8.46	8.2
LOC108979868	0	0	0	0	0	0	0	0	0	0	0	0	0	0	0	0	0	0.1
LOC108979869	1.48	1.71	1.71	1.79	1.87	1.74	2.04	1.41	0.98	1.69	1.21	1.57	1.43	1.63	1.96	0.85	2.08	1.02
LOC108979873	0.12	0.51	0.2	0.63	0.54	0.55	2.07	0.74	1.98	5.87	1.56	0.45	7.45	7.36	15.24	7.46	25.64	22.53
LOC108979874	0	0	0	0.03	0	0	0	0.1	0	0	0	0.03	0	0	0.59	0.1	0.17	0.07
LOC108979876	0.52	0.1	0.32	0.95	0.35	1.11	1.54	2.89	9.13	1.89	1.17	0.4	0.87	0.4	9.1	1.4	10.27	2.65
LOC108979877	20.15	20.16	21	13.04	16.04	16.37	23.02	20.21	21.87	21.37	22.05	22.98	12.98	16.52	23.95	19.4	24.12	20.74
LOC108979878	0	0.18	0.28	10.63	30.43	9.55	107.39	1.44	44.7	7.84	9.27	0.54	1.3	3.37	31.83	25.66	18.19	20.65
LOC108979881	3.48	2.75	2.6	3.47	1.93	5.94	2.23	2.47	2.7	2.29	2.88	3.61	4.61	2.88	1.73	1.62	1.23	0.99
LOC108979882	0.31	0.62	0.23	29.01	12.75	2.42	11.39	15.85	25.78	15.53	1.29	1.3	14.51	8.74	43.81	4.57	21.1	4.41
LOC108979885	0.03	0.15	0.17	0.04	0.21	0.09	0.12	0.18	0.06	0.12	0.05	0.07	0.05	0.13	0.18	0.06	0.07	0.08
LOC108979892	13.97	12.4	15.18	10.98	11.72	8.39	19.89	13.44	13.11	21.19	14.25	12.43	19.16	17.62	13.02	7.59	14.33	19.05
LOC108979893	51.31	34.29	54.61	56.66	65.73	47.32	37.06	37.95	37.78	37.32	37.53	40.34	39.14	40.27	40.86	29.2	41.91	43.78
LOC108979894	1.83	2.69	2.13	1.51	1.33	1.85	1.21	2.34	1.05	1.73	2.29	1.84	1.74	2.02	0.92	1.33	1.18	0.89
LOC108979895	13.59	15.77	13.13	18.36	16.93	17.81	14.92	16.26	14.9	15.55	14.7	14.5	22.55	16.28	14.16	13.37	12.35	11.82
LOC108979896	15.07	16.56	21.55	5.78	3.23	8.51	2.28	3.16	1.82	1.84	1.76	1.47	1.77	3.35	1.11	4	2.77	2.48
LOC108979897	8.02	1.64	6.48	4.84	1.92	1.36	1.21	8.47	1.3	12.29	11.19	11.58	8.13	3.91	0.83	0.32	1.79	3.84
LOC108979898	46.45	37.28	43.95	31.76	14.37	39.31	3.72	22.25	5.4	18.58	18.34	20.57	23.11	21.32	3.83	15.82	15.95	19.16
LOC108979899	0.05	0.07	0.12	0	0.06	0.01	0.04	0.04	0	0.03	0	0.02	0.04	0.09	0	0.03	0.01	0
LOC108979901	11.13	5.93	9.9	3.47	2.32	4.16	2.21	7.51	1.03	13.31	13.15	10.49	7.56	9.4	1.79	2.84	3.4	5.02
LOC108979902	0	0.07	0.09	0.07	0.16	0.3	3.78	0.1	0.33	0.92	0	0.17	0.48	0.4	1.32	0.09	4.39	2.22
LOC108979904	166.4	143.19	146.72	123.91	94.97	134.33	110.03	163.56	90.35	179.73	131.62	287.18	257.67	232.65	110.54	85.51	111.15	113.69
LOC108979905	0.58	1.46	0.36	0.6	0.96	0.46	0.54	1.34	0.68	1.23	1.26	1.15	0.46	0.88	0.65	1.42	0.34	0.36
LOC108979906	6.21	5.54	6.65	6.24	6.39	7.03	5.62	6.29	4.6	5.89	6.06	6.39	3.74	5.46	4.97	4.73	4.46	4.47
LOC108979908	0	0	0	0.35	0.34	0.62	3.8	0.03	1.43	0.32	0.42	0	0.05	0	1.22	0.76	0.97	0.69
LOC108979910	8.89	10.38	8.19	42.05	19.27	17.79	8.94	15.66	9.37	31.23	8.86	37.22	10.24	14.22	16.47	2.41	16.76	11.48
LOC108979911	0.1	0	0.06	0	0.03	0.29	1.37	0.2	0.2	0.42	0.34	0.12	0	0	0.13	0.06	0.67	1.88
LOC108979914	149.23	148.68	135.45	243.25	314.11	205.46	319.77	148.53	252.1	168.35	178.61	148.05	215.49	166.26	256.47	150.47	261.69	268.66
LOC108979915	32.79	36.15	32.95	17.9	16.17	14.33	15.58	18.36	9.51	17.27	21.14	19.57	21.93	24.03	10.33	20.57	18.54	22.13
LOC108979921	6.83	7.21	7.21	6.24	5.9	4.69	6.66	8.17	5.04	6.75	5.52	6.68	7.22	6.1	8.45	4.15	6.59	6.44
LOC108979922	8.96	11.65	8.05	6.6	8.1	7.93	7.63	9.37	7.98	7.11	6.29	6.71	11.35	7.46	7.31	7.83	7.44	8.53
LOC108979925	0	0	0	0.03	1.75	0	0.78	0.02	0.07	0	0.12	0	0.03	0.28	0.14	0.99	0.45	0.66
LOC108979929	0	0	0	0	0	0	0	0	0	0	0	0	0	0	0	0	0	0
LOC108979930	0.5	0.72	0.59	3.67	3.62	2.77	2.36	3.42	2.9	3.76	2.24	0.88	1.84	1.46	4.77	3.5	3.74	3.52
LOC108979931	0.79	1.43	0.81	0.58	1.28	0.34	0.04	0.85	0.09	0.41	0.9	0.86	0.92	1.69	0.09	0	0.04	0.47
LOC108979932	0	0	0	0.14	0.05	0.09	0.09	0	0	0	0	0	0	0	0.05	0.04	0	0
LOC108979933	21.46	29.07	20.93	29.56	21.11	20.63	21.53	17.41	21.74	21.53	12.74	16.67	16.27	16.41	12.72	19.05	17.16	13.23
LOC108979934	0	0	0	0	0	0	0	0.03	0	0	0	0	0	0	0.07	0	0	0
LOC108979935	14.01	13.08	13.33	11.8	15.33	16.52	8.67	12.73	8.7	11.9	11.73	14.52	13.73	10.6	11	8.85	9.04	8.86
LOC108979936	43.5	211.74	47.24	68.58	78.39	61.88	85.89	75.57	111.7	34.1	38.42	36.34	48.37	48.41	73.96	116.76	73.07	73.73
LOC108979937	20.08	11.9	19.96	17.48	15.48	13.17	7.32	19.64	9.02	13.1	12.29	16.5	18.64	18.97	10.1	12.39	17.39	12.2
LOC108979938	4.47	4.91	4.28	13.14	13.49	10.84	14.5	11.99	18.74	16.51	15.07	8.38	9.21	8.99	14.79	13.61	13.46	15.2
LOC108979939	10.32	11.81	11.23	11.39	9.62	9.63	9.17	11.75	9.25	9.37	10.54	11.36	13.38	12.12	11.38	12.63	7.78	8.32
LOC108979940	0.18	0.19	0.13	0.09	0	0.23	0.24	0.24	0.1	0.1	0.41	0.09	0	0.17	0	0.32	0	0.05
LOC108979941	14.74	12.17	11.74	8.97	6.67	6	9.45	11.2	6.7	19.04	14.4	19.19	15.57	10.49	9.04	5.38	12.28	14.67
LOC108979942	0.12	0.09	0.27	0.16	0	0	0.02	0.21	0.22	0.03	0	0.02	0.16	0.48	0.19	0.3	0.29	0.02
LOC108979943	6.92	12.49	11.78	2.12	2.46	7.81	6.21	6.39	5.99	4.81	2.42	1.48	15.09	15.63	1.21	13.6	4.35	7.12
LOC108979945	12.19	10.59	9.59	4.62	2.54	5.85	5.5	13.93	3.58	14.65	5.4	9.44	13.62	10.21	1.96	6.76	3.62	3.62
LOC108979946	0.11	0	0	0	0	0	0	0	0	0	0	0	0	0	0.27	0.05	0.11	0.05
LOC108979948	0	0	0	0	0	0	0.04	0.08	0	0	0	0	0	0	0	0.08	0.09	0
LOC108979949	44.02	42.98	44.78	34.69	30.07	29.23	21.21	37.51	27.64	41.44	56.99	42.18	41.44	41.98	29.95	41.85	34.29	38.87
LOC108979950	85.17	88.43	93.11	144.61	149.96	113.89	89.22	82.89	125.06	88.81	104.38	81.74	71.29	72.79	126.39	81.68	103.18	105.7
LOC108979951	27.3	34.92	26.79	45.72	60.78	36.7	79.37	28.15	75.36	32.76	36.3	27.02	23.6	28.66	76.36	56.57	62.45	52.16
LOC108979952	229.34	197.43	251.37	125.32	106.72	147.09	63.94	207.69	80.65	127.38	123.33	232.69	274.14	288.65	89.64	83.43	106.54	122.57
LOC108979953	40.11	32.14	35.39	34.86	30.13	29.79	30.3	37.68	28.18	36.77	43.3	48.83	35.57	40.96	32.28	28.39	31.66	32.69
LOC108979954	40.22	33.77	36.7	22.61	28.38	13.99	7.92	29.57	17.09	30.27	29.86	37.43	21.49	33.1	13.49	11.05	13.02	10.04
LOC108979956	0.1	0.06	0.12	0.06	0.17	0.1	0	0.03	0.07	0.1	0	0.18	0.12	0.3	0	0.25	0.03	0
LOC108979957	0.62	0.33	1.29	12.44	12.55	15.01	74.7	4.39	58.63	17.22	10.57	2.25	2.23	0.7	12.7	4.85	4.89	3.6
LOC108979962	27.92	23.16	26.52	44.54	48.45	44.35	31.33	24.44	35.02	31.22	32.05	33.09	26.07	26.34	35.73	24.61	37.91	33.31
LOC108979963	0	0	0	0.03	0	0.06	1.81	0	0.16	0.17	2.47	0.12	0	0.03	0.03	0.71	0.13	2.34
LOC108979964	6.76	5.47	7.76	6.07	7.42	4.76	4.61	3.68	3.56	5.91	7.1	5.34	5.91	6.73	5.9	7.72	7.43	6.61
LOC108979965	47.25	52.79	53.9	25.63	26.57	22.75	11.67	35.32	13.04	22.18	38.31	40.87	35.89	58.23	14.6	18.51	11.3	14.61
LOC108979967	7.8	5.97	7.03	9.64	9.89	9.51	11.57	5.08	14.26	8.4	3.4	4.67	4.37	4.88	16.51	7.65	9.6	3.65
LOC108979969	3.25	4.47	4.22	5.37	4.96	4.09	6.19	4.22	7.28	4.26	5.53	5.21	2.75	4.04	5.86	4.36	5.76	4.21
LOC108979970	0	0	0	0	0	0	0	0	0	0	0	0	0	0	0.06	0.11	0	0
LOC108979976	11.43	9.55	10.85	8.55	7.14	6.42	10.69	18.25	12.44	23.25	20.36	21.67	37.32	12.61	11.1	7.62	11.62	14.17
LOC108979977	3.99	5.49	7.58	2.66	4	7.37	4.41	5.12	3.41	3.63	2.92	3.44	1.91	6.55	6.41	5.1	6.31	6.16
LOC108979980	0	0	0.03	0	0.03	0	0	0	0	0.04	0	0.09	0	0	0	0.06	0.1	0.03
LOC108979982	35.02	42.14	30.71	22.18	30.25	18.43	18.67	50.39	58.68	32.62	46.51	46.34	39	39.47	56.19	24.13	36.9	32.16
LOC108979983	0.92	0.8	1.26	0.52	0.21	0.86	1.51	1.3	1.18	2.71	2.12	2.66	1.93	2.47	1.04	2.24	1.11	1.13
LOC108979984	0	0	0	0	2.41	0	0.06	0.02	0.08	0	0	0	0	0	0.17	0.05	0.04	0
LOC108979987	0.63	1.76	1.16	2.89	4.03	3.72	2.52	1.1	2.29	1.61	1.28	1.11	1.75	2.02	1.98	1.82	1.94	0.98
LOC108979988	12.75	12.85	12.64	21.53	24.94	22.7	12.88	11.73	15.19	8.85	11.13	11.25	8.4	10.74	16.01	14.21	12.6	13.51
LOC108979989	3.17	2.36	3.86	3.58	3.56	3.06	2.52	4.21	2.41	3.4	3.58	3.44	3.09	3.74	2.88	2.33	2.31	2.56
LOC108979994	19.45	15.52	17.46	14.86	14.09	17.36	11.57	16.83	14.4	12.8	15.11	17.76	9.06	16.57	15.84	14.29	12.52	14.6
LOC108979995	1.64	1.37	2.01	1.52	1.28	1.2	2.8	0.68	1.1	0.75	0.92	1.42	0.28	0.7	0.83	0.97	1.2	1.18
LOC108979996	12.67	12.78	14.24	18.22	17.97	24.03	28.99	17.95	18.77	21.64	19.43	17.54	8.64	11.98	19.73	18.67	14.9	15.33
LOC108979998	11.65	11.61	15.62	10.62	6.25	18.51	8.61	7.25	5.51	5.07	2.82	5.15	3.71	5.77	4.45	5.02	6.95	5.65
LOC108980000	11.19	5.96	17.21	10.61	10.52	14.34	34.74	18.77	23.42	15.63	14.14	13	8.22	13.53	25.8	35.13	13.49	24.23
LOC108980001	32	30.94	36.76	39.87	41.61	51.45	86.45	47.54	75.85	41	34.92	35.43	32.86	41.58	81.57	61.9	68.69	50.03
LOC108980004	21.49	18.77	31.53	12.55	24.76	36.98	19.76	25.91	15.35	17.12	13.48	24.77	16.4	34.57	16.2	32.24	14.33	22.56
LOC108980005	51.55	63.08	52.75	88.04	60.11	94.75	46.95	71.63	63.13	62.62	68.17	75.7	61.3	71.95	65.81	58.63	38.94	50.31
LOC108980006	7.06	23.66	12.87	501.29	320.44	521.6	153.63	113.26	149.78	154.93	444.54	93.95	82.31	105.44	292.26	239.09	182.37	532.84
LOC108980007	8.39	9.1	9.14	20.03	78.77	51.22	181.95	118.89	149.37	48.02	28.49	46.35	33.06	34.78	131.73	200.47	46.63	15.75
LOC108980008	0.29	0.35	0.5	2.87	37.99	4.19	1.11	0.46	2.79	1.13	0.36	0.71	0.69	0.21	7.43	0.88	0.62	0.57
LOC108980009	4.79	3.48	3.67	1.92	2.69	1.69	3.11	3.49	2.77	4.01	6.21	2.84	2.88	2.65	2.11	7.14	2.03	3.12
LOC108980010	2.53	5.6	3.42	2.97	3.15	3.48	1.69	4.93	1.02	2.21	1.94	2.2	2.3	3.15	1.01	1.28	1.3	1.77
LOC108980012	0	0	0	0	0	0.02	0.05	0	0	0	0.02	0	0	0	0	0	0	0
LOC108980013	19.98	22.46	17.7	34.5	42.35	9.52	9.74	25.49	27.24	16.32	3.13	20.53	22.43	14.54	14.74	4.69	29.43	8.47
LOC108980014	0.37	0.3	0.21	0.15	0	0.37	0.84	0.56	0.15	0.8	0.22	0.27	0.49	0.55	0.31	0.29	0.19	0.26
LOC108980015	3.53	3.87	2.49	13.76	12.46	9.78	9.09	4.45	9.82	4.26	2.13	5.52	4.31	4.09	12.88	4.43	8.95	7.46
LOC108980016	7.14	7.09	7.23	8.81	8.25	4.86	6.8	9.63	7.12	6.33	6.24	10.94	9.9	9.37	7.66	3.67	7.29	6.71
LOC108980019	0	0	0.3	0	0.11	0.83	0	0	0	0	0	0	0	0	0	0	0	0
LOC108980020	2.58	2.96	6.65	3.25	12.84	10.47	33.83	5.63	8.79	7.16	5.65	4.64	2.09	5.16	15.56	11.94	9	12.97
LOC108980022	0.21	0.06	0	0	0.03	1.17	0.09	0	0.09	1.4	0.2	0.56	0.28	0.14	0.06	0.03	0.09	0.58
LOC108980024	25.35	15.98	25.45	17.86	13.5	36.79	18.53	25.73	13.5	17.38	14.76	16.05	17.7	16.03	18.14	24.41	14.99	22.41
LOC108980026	0	0	0	0	0	0.08	0	0	0	0	0	0	0	0	0.08	0	0	0
LOC108980028	7.51	9	7.66	13.18	13.01	12.33	10.61	8.6	9.42	13.95	12.73	13.42	7.55	8.09	11.97	9.4	12.6	11.28
LOC108980029	1.4	1.83	1.73	13.23	9.35	9.82	12.47	4.69	10.95	14.03	11.78	12.37	3.36	3.4	16.26	4.28	16.88	11.96
LOC108980030	0.39	0.22	0.38	0.39	0.62	0.42	0.2	0.15	0.2	0.37	0.24	0.23	0.12	0.05	0.15	0.36	0.03	0.05
LOC108980031	6.61	18.58	8.65	2.99	2.9	3.88	8.26	9.32	5.64	4.8	3.28	4.4	8.43	9.64	4.56	6.42	4.63	4.31
LOC108980032	381.11	401.38	342.66	452.46	471.8	361.97	500.68	365.68	485.01	330.14	341.82	304.64	283.86	314.09	475.24	299.17	515.48	477.11
LOC108980033	10.16	9.81	8.97	16.27	16.62	14.98	10.02	11.37	11.08	12.57	11.65	12.48	8.01	11.29	11.51	7.29	11.91	9.15
LOC108980034	9.38	23.65	5.38	1.49	5.7	4.65	3.61	10.33	3.32	4.55	2.31	3.52	4.62	5.06	4.11	2	5.95	2.14
LOC108980035	13.95	12.04	18.09	16.69	15.9	15.97	12.22	14.19	9.85	12.56	11.27	15.96	20.06	15.19	17.2	16.81	17.35	19.69
LOC108980037	0.24	0.14	0.14	0.02	0.17	0.24	4.55	0.31	1	1.92	0.12	0.2	0.75	0.4	2.9	0.46	2.75	2.23
LOC108980039	53.25	36.48	48.39	26.37	22.41	28.46	15.04	52.92	19.44	45.52	44.53	52.71	54.17	67.99	15.3	21.46	19.77	26.15
LOC108980041	0	0	0	0	0.22	0	0	0.13	0	0	0	0.04	0	0	0	0	0.04	0
LOC108980042	1.44	0.89	0.54	0.99	1.64	0.78	0.81	0.57	1.25	2.06	0.32	0.83	1.06	1.04	2.19	0.65	1.03	0.45
LOC108980046	17.91	18.9	24.71	30.64	33.22	24.95	21.73	18.25	19.61	22.62	21.4	22.48	28.75	19.56	23.58	17.37	24.5	25.2
LOC108980050	2.41	2.35	2.72	2	0.84	0.93	0.7	2.92	0.69	1.58	1.53	3.72	2.49	1.73	0.62	0.24	1.11	2.48
LOC108980051	0.24	0.43	0.18	0.05	0.09	0.05	0	0.03	0	0.3	0.16	0.15	0.13	0.18	0	0	0.03	0.03
LOC108980052	0.79	0.64	0.79	2.41	1.32	0.64	8.03	0.76	2.88	6.59	4.98	0.74	1.92	0.77	5.33	3.71	9.87	11.02
LOC108980055	0	0	0	0.05	0	0.05	0.84	0	0.44	0.21	0.98	0	0.14	0.04	0.1	1.21	0.15	0.34
LOC108980058	0	0	0	0	0	0	0	0	0	0	0	0	0	0	0	0	0	0
LOC108980061	19.72	19.95	18.28	21.36	25.61	21.98	20.02	23.72	19.51	24.51	25.75	21.13	32.28	25.2	16.51	24.08	20.41	22.24
LOC108980062	54.03	46.08	48.9	64.78	35.62	50.73	15.62	18.12	18.53	17.86	15.81	18.03	22.11	19.03	12.98	17.09	22.38	23.25
LOC108980063	6.76	7.83	3.39	4.05	3.87	3.95	0.33	2.88	1.29	8.26	3.34	5.72	4.32	4.04	0.89	1.17	2.86	1.72
LOC108980064	0.13	0.26	0.32	0.33	0.62	0.53	0.2	0.07	0.07	1.22	0.06	0.18	0.38	0.25	0	0.38	0.68	0.4
LOC108980065	12.41	14.34	14.56	14.06	10.79	13.27	15.08	12.93	14.24	16.15	13.15	13.92	15.81	13.14	21.23	11.97	21.19	20.27
LOC108980066	0.37	0.13	0.15	0.5	0.99	0.45	0.08	0.25	0.2	0.33	0.48	0.34	0.25	0.15	0.18	0.17	0.24	0.13
LOC108980067	0	0	0.05	0	0	0	0	0	0	0.1	0	0.18	0.14	0	0.05	0	0	0
LOC108980068	0.05	0	0.07	0.12	0	0.07	0	0.15	0.05	0.37	0.28	0.07	0.12	0	0	0	0	0.05
LOC108980069	6.69	7.4	5.27	5.62	7.24	6.4	7.1	4.44	4.1	4.29	6.01	4.84	2.36	2.67	6.34	3.59	4.53	4.21
LOC108980071	7.86	7.64	7.37	10.63	17.83	17.44	35.57	10.32	16.61	8.26	10.74	8.27	10.21	9.66	20.53	14.09	11.66	15.52
LOC108980072	0.03	0	0.17	0	0.13	0	0.03	0.13	0	0.14	0.07	0.14	0.02	0	0.03	0	0.08	0
LOC108980073	17.18	20.79	20.21	21.34	24.38	19.94	19.27	17.79	21.81	24.58	20.59	18	27.23	18.73	26.19	18.57	24.72	21.52
LOC108980075	21.18	21.75	24.98	12.4	10.08	11.73	7.7	21.61	9.51	13.26	9.71	13.31	15.21	17.76	8.64	13.05	8.72	11.18
LOC108980078	3.91	5.73	3.62	1.95	4.23	4.93	3.7	4.83	2.83	3.51	3.65	4.91	6.63	3.85	4.81	2.95	2.86	3.93
LOC108980082	21.87	27.84	21.96	18.52	12.88	12.85	2.22	22.95	4.27	9.48	10.66	28.42	15.05	11.96	7.7	4.16	7.56	5.16
LOC108980085	13.7	9.64	15.51	8.27	26.29	11.85	1	10.61	4.83	4.26	2.98	6.84	7.14	9.02	5.25	2.43	4.49	3.2
LOC108980086	69.23	47.43	73.4	41.58	24.25	21.33	33.02	65.18	38	99.57	90.34	98.39	101.72	85.55	31.39	31.89	18.16	26.11
LOC108980088	0	0	0	0	4.35	0.07	0	0	0.99	0.06	0.03	0	0.12	0.02	0.11	0.02	0	0
LOC108980090	14.6	12.84	11.89	13.01	11.95	10.09	10.69	14.58	14.48	18.34	20.12	19.3	12.5	14.31	13.57	11.57	16.64	13.59
LOC108980091	0.08	0.16	0	0.32	0.08	0	2.73	0.55	1.03	1.96	0.63	0.06	1	0.32	0.75	0.35	3.08	2.37
LOC108980092	0	0.04	0.04	0	0	0	0	0.04	0	0.13	0	0	0	0.26	0	0	0	0
LOC108980093	0	0.04	0.08	0	0	0.3	0.22	0.13	0.09	0.05	0.04	0.04	0.28	0.4	0.04	0.04	0.22	0.09
LOC108980095	4.1	4.3	11.15	5.23	32.82	16.06	16.76	10.37	28.21	7.87	5.31	7.92	6.74	14.73	75.29	7.47	6.88	6.28
LOC108980096	0.26	0.46	0.25	0.37	0.25	0.15	0.59	0.56	0.36	0.77	0.17	0.59	0.88	1.05	0.71	0.43	0.41	0.29
LOC108980098	8.13	6.28	8.9	1.98	0.7	1.72	0.3	1.16	0.58	2.8	1.39	9.21	1	0.89	2.76	0.46	0.29	1.46
LOC108980099	0	0	0	0.07	0	0.11	0	0	0	0	0	0	0.04	0	0	0	0	0
LOC108980100	7.53	7.44	6.92	7.44	8.17	6.36	5.4	5.55	5.41	5.9	6.9	8.74	9.61	7.14	8.24	4.19	4	5.49
LOC108980102	14.64	14.9	15.06	14.02	17.45	12.48	12.38	14.94	13.52	12.28	13.25	13.65	10.32	13.35	14.99	13.25	13.07	12.96
LOC108980103	13.33	14.27	15.91	11.38	12.29	11.54	11.04	15.34	12.05	12.13	13.96	11.58	10.43	11.63	13.94	10.52	9.77	11.15
LOC108980106	53.43	60.14	53.37	18.27	38.9	62.15	154.5	57.44	111.31	84.65	43.37	75.59	45.88	85.31	97.05	136.66	64.03	80.21
LOC108980107	58.63	51.57	59.03	53.59	46.88	42.12	30.39	42.9	35.37	40.1	48.43	44.95	38.43	46.57	34.53	50.35	41.99	43.05
LOC108980108	0	0.11	0	0	0.23	0.11	0.28	0.06	0.22	0.18	0.27	0.05	0.21	0.05	0.28	0	0	0.45
LOC108980109	6.52	8.34	8.87	6.65	7.05	7.57	6.49	8.78	8.21	9.17	10.03	8.53	12.02	8.29	6.87	10.05	8.1	7.35
LOC108980111	55.57	50.64	52.96	46.44	56.98	32.33	26.32	33.93	46.68	23.38	28.3	20.79	29.31	33.78	38.32	73.22	42.84	31.19
LOC108980112	2.13	5.5	6.19	0.48	1.28	1.65	0.06	0.87	0.56	0.4	0.48	0.8	0	1.14	0.51	0.18	0.69	0.37
LOC108980113	0.04	0.04	0.08	0	0.04	0	0.84	0.35	0.53	2.1	0.21	0.24	1.18	0.76	0.93	0.25	2.65	2.1
LOC108980114	7.81	8.41	9.55	13.17	9.35	12.17	7.73	9.85	10.4	8.63	7.65	8.13	11.08	6.64	11.21	10.36	10.9	10.39
LOC108980115	110.04	77.73	117.61	66.94	46.23	80.88	44.67	111.8	51.39	77.71	118.47	87.48	161.85	109.58	37.84	136.12	58.31	130.62
LOC108980116	16.29	21.01	19.21	50.03	68.73	54.33	39.65	24.8	35.5	26.91	24.26	26.33	45.2	24.52	47.19	29.25	37.34	44.73
LOC108980117	22.13	22.01	20.64	18.92	15.34	19.7	24.74	19.56	18.48	25.66	29.16	20.95	17.14	20.55	19.82	31.37	24.7	23.31
LOC108980118	2.62	3.6	2.34	2.74	2.99	1.43	1.6	2.54	1.52	1.48	1.65	2	2.04	2.31	1.93	1.24	1.43	1.58
LOC108980119	64.75	56.5	60.21	78.06	74.59	66.46	76.56	42.15	60.69	53.47	51.26	58.5	52.19	46.02	60.49	38.66	88.01	81.34
LOC108980120	13.19	11.45	11.87	18.81	15.34	19.29	7.51	20.8	13.2	15.75	12.52	13.97	11.85	15.3	10.82	8.69	11.17	11.73
LOC108980121	139.11	61.51	127.57	127.17	92.56	102.33	60.3	60.84	58.97	81.13	87.75	111.65	60.47	40.13	71.28	68.37	64.21	89.65
LOC108980122	43.68	34.55	43.77	26.79	26.46	23.32	24.69	36.39	29.5	34.86	31.36	31.56	39.36	38.4	29.13	37.48	25.3	27.21
LOC108980125	1.15	1.63	0.95	0.64	0.64	0.68	0.74	1.28	1.46	1.66	1.72	2.27	3.49	1.94	0.81	0.79	0.95	1.87
LOC108980126	29.16	31.62	30.87	22.89	23.39	15.41	13.06	22	12.21	18.17	21.49	25.84	17.67	25.45	15.92	14.77	14.27	12.31
LOC108980127	31.8	68.73	42.52	50.95	46.98	38.65	107.17	104.37	152.09	136.38	127.37	113.19	231.42	112.88	216.25	79.44	66.01	98.05
LOC108980128	15.63	20.14	12.92	6.17	12.49	3.99	4.6	5.34	5.08	9.45	2.64	13.77	18.3	24.47	5.77	23.29	3.24	2.39
LOC108980130	6.64	7.89	7.73	5.48	4.89	5.4	5.31	7.85	5.19	6.7	6.94	5.44	5.45	7.04	4.85	5.15	5.08	4.95
LOC108980132	4.72	6.33	4.45	4.02	5.06	2.96	4.57	5.31	3.38	3.77	2.63	3.64	4.64	4.41	4.09	2.78	3.92	3.36
LOC108980137	70.13	92.28	79.03	70.01	102.62	51.28	50.75	80.77	64.27	69.39	79.89	83.26	48.51	74.65	81.55	68.46	60.56	53.66
LOC108980138	8.6	8.99	7.73	16.28	17.66	11.11	26.79	9.72	26	18.23	14.09	12.27	9.04	8.59	21.4	14.02	20.4	15.18
LOC108980139	12.72	15.09	13.39	15.6	14.65	16.8	19.91	15.71	12.2	13.74	10.5	17.41	35.77	20.21	19.98	9.9	16.48	19.05
LOC108980141	35.39	31.69	32.74	56.85	50.03	37	45.52	39.6	50.52	45.68	49.73	42.53	27.83	28.74	46.4	40.39	48.66	48.08
LOC108980142	42.67	49.88	52.06	37.34	41.61	25.53	97.83	49.79	63.4	84.77	88.56	52.99	89.41	65.35	77.48	93.27	63.44	81.38
LOC108980144	33.8	27.83	32.01	17.73	17.18	14.87	15.36	32.64	17.2	25.67	24.57	32.76	44.12	38.45	15.48	19.81	20.27	21.64
LOC108980146	8.91	8.86	9.27	12.29	12.22	8.55	9.67	11.98	11.59	11.86	11.34	12.98	12.42	10.64	13.35	10.12	10.32	10.24
LOC108980148	41.93	40.88	38.93	52.89	50.38	44	49.55	39.24	39.75	37.33	49.19	42.81	22.5	38.72	43.34	37.71	47.85	38.83
LOC108980149	0	0	0.02	0	0	0	0	0	0	0	0	0	0	0	0	0	0	0
LOC108980152	0.63	0.45	0.38	0.34	0.57	0.55	1.11	0.52	0.28	1.07	0.74	0.62	0.57	0.59	0.54	0.62	0.28	0.56
LOC108980153	23.74	12.71	38.27	3.84	17.03	26.75	9.03	14.26	9.78	13.97	11.01	14.61	8.39	19.95	12.39	15.33	14.89	17.73
LOC108980154	1.84	1.74	2.72	2.66	2.45	3.32	5.52	3.99	5.3	3.6	2.99	2.28	2.53	3.14	8.1	2.28	5.56	4.72
LOC108980155	0.65	0.68	0.82	0.35	0.94	0.87	0.49	1.18	0.34	0.56	0.3	0.26	0.4	0.35	0.58	0.5	0.51	0.41
LOC108980156	0.16	0	0.1	0	0	0	0.65	0.37	0.11	0.11	0	0	0.1	0.1	0.43	0.25	0.16	0.27
LOC108980160	0	0	0	0.02	0.04	0	0.02	0	0.02	0	0	0	0	0	0.02	0	0	0
LOC108980161	11.5	8.22	11.29	11.46	10.28	12.05	5.34	7.91	5.63	5.89	9.01	9.35	4.45	7.66	5.04	6.62	6.03	5.59
LOC108980162	37.15	45.43	39.04	54.96	54.47	54.17	44.65	39.62	52.31	40.25	48.3	47.57	55.61	44.53	47.05	45.2	46.24	43.89
LOC108980163	27.53	23.05	30.09	30.81	20.91	24.1	16.38	25.88	19.29	28.46	23.85	29.18	19.78	25.48	18.52	16.1	20.33	23.07
LOC108980165	1.35	0.57	1.59	0.84	0.12	2.05	0.18	0.64	0.81	1.36	0.5	1.16	0.38	0.43	0.35	0	0.47	0
LOC108980166	0.38	0.26	0.06	0.26	0.14	0.13	0	0	0.2	0	0	0	0	0	0.2	0	0	0
LOC108980167	0.31	0.08	0.68	0.15	0	0.16	0	0	0	0.26	0	0	0.15	0.22	0	0	0	0.08
LOC108980168	0	0	0	0	0.04	0.04	0	0	0	0	0	0	0	0.02	0	0	0	0
LOC108980169	0.02	0.14	0.02	0.06	0.06	0.04	1.3	0.04	0.45	0.87	0.19	0.09	0.34	0.28	1.08	0.33	1.38	1.47
LOC108980170	0	0.11	0.03	0.11	0.06	0.13	0.03	0.11	0.08	0.15	0.1	0.37	0.2	0.05	0.17	0.03	0.06	0.05
LOC108980171	0.07	0.07	0.17	0.35	0.3	0.07	0.55	0.32	0	0.31	0.27	0.2	0.4	0.2	0.37	0.17	0.51	0.07
LOC108980172	0	0	0	0	0	0	0	0	0.06	0	0	0	0	0	0	0	0	0
LOC108980174	9.99	14.81	15.79	21.91	29.23	42.81	16.62	13.09	24.56	12.03	5.95	8.14	19.32	14.88	25.67	26.05	37.63	32.18
LOC108980175	0	0.03	0.03	0.03	0.06	0.03	0.12	0	0.46	0.22	0	0.03	0.11	0.13	0.38	0	0.21	0.03
LOC108980176	0.18	0.28	0.27	0.28	0.63	0.12	0.02	0.39	0.16	0.02	0.14	0.28	0.34	0.38	0.17	0.06	0.1	0.43
LOC108980177	0.04	0.19	0.03	0.04	0.2	0.07	2.28	0.37	0.57	1.02	0.04	0.23	0.31	0.34	0.88	0.21	2.61	1.37
LOC108980178	5.42	5.16	7.03	7.62	5.6	6.01	6.29	5.05	5.45	7.03	6.16	3.88	5.74	4.21	5.64	5.9	7.4	8.6
LOC108980179	0	0	0	0	0	0	0	0	0	0	0	0	0.04	0	0	0	0	0.05
LOC108980180	25.33	26.97	26.29	25.61	24.78	26.17	17.42	20.56	17.55	17.9	20.24	23.35	18.8	22.5	19.87	21.48	20.8	18.74
LOC108980181	0.72	1.27	0.69	0.38	1.69	0	0.31	1.34	0.22	0.28	0.33	1.62	0.73	1.39	0.66	0.04	0.31	1.13
LOC108980184	22.7	20.56	25.7	16.36	55.16	68.69	106.28	52.89	50.89	49.16	47.36	38.86	23.05	39.74	82.14	147.27	40.37	45.86
LOC108980185	5.24	3.07	4.54	5.8	6.4	4.38	4.27	2.64	2.21	4.13	1.82	3.08	2.33	2.47	4.72	1.82	4.61	5.05
LOC108980186	0	0	0.04	0	0	0	0	0	0	0.29	0	0	0	0	0	0	0.41	0.14
LOC108980189	0.65	0.62	0.88	0.48	0.51	0.46	1.8	1.42	0.62	1.91	1.13	1.2	0.7	0.99	0.94	0.54	1.53	1.4
LOC108980191	1.14	1.79	1.38	6.81	3.46	2.76	6.19	3.25	8.71	10.81	4.49	2.73	3.88	4.06	17.86	6.29	6.73	2.71
LOC108980192	0.05	0.05	0.16	0	0.11	0.03	0.03	0.06	0.06	0	0.16	0.13	0.05	0.05	0.25	0	0.2	0
LOC108980193	1.28	1.36	0.94	1.02	0.76	0.75	0.77	1.1	0.53	0.81	1.05	1.17	0.93	0.67	0.51	0.67	0.58	0.66
LOC108980199	0.21	0.47	0.08	0.13	0.36	0	0.49	1.32	0.18	0.09	0.17	0.4	1.15	1.37	1.03	1.59	0	0.13
LOC108980201	0.97	0	0.23	4.91	8.32	0.19	0	2.47	0.94	1.22	0.57	2.98	0.46	0.55	1.21	0.05	0.45	0
LOC108980203	4.53	3.96	2.56	16.97	18.9	5.52	30.49	10.72	27.62	20.71	10.48	11.62	9.77	7.65	29.93	12.17	26.66	16.55
LOC108980206	0.07	0	0	0	0.49	0.13	0.41	1.15	1.15	5.87	1.81	0.62	3.54	0.75	1.99	0.13	1.99	0.48
LOC108980210	9.4	9.93	8.03	10.85	8.85	9.79	11.98	7.69	10.79	9.81	7.34	7.99	10.23	8.62	11.4	7.93	9.61	10.09
LOC108980211	0.15	0.21	0.66	1.41	2.93	5.59	11.26	7.67	9.73	1.23	1.67	3.04	1.52	3.17	13.53	24.02	3.52	1.64
LOC108980213	43.4	35.01	48.44	14.18	20.21	62.5	25.17	35.41	21.41	19.84	15.1	24.23	27.89	35.17	25.75	55.03	21.76	19.22
LOC108980214	5.24	3.8	7.12	8.91	16.28	9.61	19.81	20.71	16.15	35.76	17.01	25.93	29.65	10.47	19.66	12.43	17.65	16.97
LOC108980216	1.54	2.36	0.66	1.4	0.41	2.54	0.22	0.83	0.83	4.92	2.3	3.48	0.53	0.12	1.47	0.17	0	0
LOC108980217	20.89	13.81	20.27	16.91	11.9	16.35	5.06	17.27	6.35	14.97	13.4	19.11	13.57	15.29	5.6	8.89	8.24	9.6
LOC108980218	0	0	0	0	0	0	0	0	0	0.06	0	0	0	0	0	0	0	0.16
LOC108980220	0	0.09	0	0.03	0.07	0	0.83	0.03	0.22	0.12	0.14	0.01	0.03	0	0.37	1.1	0	0.05
LOC108980227	24.88	25.23	26.28	23.84	30.93	20.96	29.28	25.51	27.5	26.73	26.93	30.68	50.15	34.89	33.74	29.19	32.5	37.46
LOC108980231	0.21	0.43	0.18	0.59	0.58	0.47	2.96	0.61	1.82	1.5	0.95	0.6	0.51	0.66	2.35	0.96	2.78	2.15
LOC108980232	33.07	27.66	30.99	51.49	60.98	36.55	54.83	23.06	40.58	32.94	33.32	30.09	15	24.57	50.91	33.83	50.06	39.62
LOC108980233	4.67	2.3	4.33	1.4	0.6	0.78	3.83	0.96	0.91	1.31	0.66	3.16	2.83	2.69	2	1.47	7.82	7.04
LOC108980234	0.02	0	0	0.22	0.3	0.07	0.47	0.07	0.15	0.08	0	0.16	0.02	0.02	0.15	0.3	0.07	0.05
LOC108980236	1.47	2.67	2.22	1.21	3.23	10.61	1.69	3.39	2.54	6.78	0.32	3.58	2.11	5.76	1.26	0.25	1.64	1.59
LOC108980240	12.62	11.87	12.81	15.25	15.22	14.02	12.87	12.5	14.1	13.51	16.17	14.71	7.99	10.26	14.14	12.6	13.92	11.36
LOC108980242	17.01	16.79	16.6	15.91	17.71	14.85	11.25	14.97	13.48	13.26	14.23	18.48	24	18.02	13.49	12	14.56	14.1
LOC108980247	17.55	18.09	22.5	14.12	9.28	17.52	12.05	11.67	6.61	10.77	8.93	9.52	7.89	11.97	5.16	15.69	12.94	10.23
LOC108980248	0.08	0	0.34	0	0	0.08	0	0.04	0.08	0.04	0	0.14	0	0	0	0	0	0
LOC108980260	0	0	0	0	0.17	0.16	0.17	0.08	0	0.26	0.08	0	0	0.23	0.25	0	0.33	0
LOC108980265	0.03	0	0	0	0	0.05	0.19	0.05	0	0.03	0.64	0.29	0.27	0.05	0.11	0.38	0.35	0.45
LOC108980267	0	0	0	0	0.06	0	7.82	0.03	0.97	0.38	0.53	0	0	0.05	1.11	0.45	3.99	12.51
LOC108980268	0.12	0	0	0.06	0	0.12	0.3	0.44	0.18	0.06	0.31	0.05	0.14	0.3	0.06	0	0.06	0.18
LOC108980271	0.03	0	0	0.01	0.03	0.01	0.02	0.03	0	0	0	0.01	0	0	0	0	0	0
LOC108980272	0.01	0.09	0.05	0.03	0.9	0	0.06	0.12	0.04	0.01	0.05	0.11	0.01	0.05	0.08	0.08	0.03	0
LOC108980279	0	0	0	0	0	0.06	0	0	0.06	0	0	0	0	0	0	0	0	0
LOC108980281	0	0	0	0.09	0.5	0.47	0.95	0.72	6.02	6.68	1.73	0.19	1.49	0.53	5.88	0.72	4.07	0.82
LOC108980284	11.56	8.54	9.58	15.03	21.21	12.78	6.58	10.52	8.12	10.15	8.87	9.24	6.79	8.74	13.9	6.77	8.59	9.07
LOC108980285	0	0	0	0	0	0	0	0.04	0	0	0	0	0	0	0	0	0	0.13
LOC108980286	19.28	28.65	26.94	16.33	24.49	19.46	7.89	19.41	15.14	16.53	14.23	25.75	47.47	32.04	15.96	10.16	15.66	13.14
LOC108980287	19.27	38.33	24.17	7.25	20.63	8.16	28.69	22.58	26.59	30.18	8.85	36.64	17.17	19.73	26.47	1.67	23.1	12.34
LOC108980288	0	0	0	0	0	0	0	0	0	0	0	0	0	0	0	0	0	0
LOC108980289	7.78	8.2	8.14	8.7	9.8	7.22	9.59	7.22	7.72	6.41	6.56	7.22	5.05	5.46	7.54	6.71	7.59	7.39
LOC108980290	4.35	4.09	4.57	5.75	7.22	6.36	2.96	3.8	1.49	2.63	3.53	4.16	2.22	2.35	3.33	3.59	1.75	1.51
LOC108980291	33.79	2.9	18.11	15.8	27.33	20.13	25.49	33.54	26.54	3.04	42.88	51.43	2.9	2.28	4.22	8.2	8.33	20.42
LOC108980293	15.22	27.69	2.19	9.68	2.91	7.17	0.21	24.44	0.21	7.09	12.02	1.31	5.51	21.34	9.29	4.26	0.83	17.47
LOC108980296	2.28	1.5	1.96	8.11	2.76	12.09	2.33	5.17	4.07	13.32	75.79	9.48	1.97	2.67	3.03	12.52	9.16	56.58
LOC108980299	0.04	0.27	0.05	0.07	0.02	0.04	0.02	0.02	0.11	0.06	0	0.08	0.44	0.05	0.06	0.03	0.09	0.04
LOC108980300	0.3	0.09	0.75	0.55	10.91	0.22	0.22	1.18	0.26	0.47	0.34	0.92	0.08	0.52	0.18	1.05	0.04	0.48
LOC108980308	0.45	0.21	0.38	1.38	1.08	1.56	1.47	0.19	1.94	0.78	3.21	0.98	0.93	0.05	1.94	4.67	0.38	1.56
LOC108980311	1.78	4.18	2.14	1.48	1.84	1.11	2.82	3.52	1.87	2.37	2.03	3.73	7.91	4.99	3.27	1.7	2.91	2.14
LOC108980312	0.27	0.4	0.27	0.31	0.21	0.38	0.23	0.23	0.13	0.15	0.37	0.12	0.07	0.11	0.36	0.19	0.24	0.16
LOC108980314	0	0	0	0.03	0.08	0	0.4	0	0.03	0.03	0	0.02	0	0.97	0.38	0.35	0.96	0.24
LOC108980315	1.11	2.16	2.34	0.17	0.05	0.44	0.7	3.82	0.42	0.79	0.59	0.54	3.41	4.81	0.4	0.61	0.35	0.07
LOC108980316	65.27	63.54	69.89	70.84	72.05	64.99	41.88	45.11	45.99	55.1	56.7	46.33	86.72	62.85	48.44	69.53	56.9	63.52
LOC108980317	0.54	0.8	1.25	6.26	28.34	8.53	35.28	3.04	22.6	9.23	6.25	1.39	4.73	1.91	41.88	45.68	16.09	26.15
LOC108980319	40.38	36.29	40.13	22.6	16.04	30.96	12.78	24.28	11.19	22.43	23.29	26.62	20.52	29.15	9.63	16.62	17.41	19.24
LOC108980320	442.16	401.4	376.06	286.34	143	247.5	148.97	288.75	265.44	397.24	284.08	446.21	384.89	348.57	199.06	316.9	364.25	463.98
LOC108980321	39.08	35.88	40.38	35.69	20.08	32.73	23.09	41.3	28.65	48.77	48.39	61.59	47.31	37.62	29.05	31	31.63	31.44
LOC108980322	17.01	17.59	18.58	15.63	17.79	16.94	19.55	19.39	16.66	10.68	11.95	11.44	11.8	16.14	17.15	19.85	18.34	18.51
LOC108980323	45.52	28.41	38.13	47.2	29.06	65.96	15.12	18.92	12.59	24.56	44.37	37.58	23.86	16.89	15.05	38.4	18.25	29.76
LOC108980324	0.85	1.4	0.92	2.66	3.33	2.76	2.66	2.56	3.24	1.99	1.65	1.87	1.67	2.06	4.49	1.45	2.79	1.92
LOC108980325	30.77	36.22	30.65	33.99	21.48	30.59	26.18	30.2	25.78	26.92	30.69	36.7	24.21	30.64	23.66	26.77	28.36	27.6
LOC108980326	2.68	2.67	3.02	2.86	2.89	2.47	3.34	3.29	3.05	3.01	2.96	2.99	2.16	3.31	2.76	2.35	2.79	1.96
LOC108980327	513.23	374.1	394.93	58.98	57.1	123.57	9.67	301.48	51.72	169.6	168.97	122.19	240.54	199.67	16.58	49.47	92.13	94.3
LOC108980328	38.04	52.37	42.63	32.53	22.42	27.1	11	36.76	16.31	19.45	21.89	25.39	39.79	30.41	16.31	14.26	21.97	30.64
LOC108980329	4.14	3.61	3	5.56	7.45	5.51	5.9	3.85	4.75	4.29	4.08	4.32	3.09	3.65	8.14	3.88	4.4	4.9
LOC108980333	9.61	5.64	8.16	7.05	7.05	3.17	15.88	10.71	14.41	12.93	3.17	5.76	6.74	4.43	7.88	6.07	9.97	2.61
LOC108980337	2.33	1.71	2.47	0.65	2.8	7.25	2.89	4.43	1.39	2.61	1.71	4.48	1.77	2.91	2.71	6.05	1.3	1.75
LOC108980339	2.1	0.84	1.62	2.13	5.97	2.9	12.35	0.82	7.94	2.49	3.99	2.72	0.86	0.79	11.86	25.85	1.87	5.15
LOC108980340	40.27	42.56	42.57	54.96	53.23	42.69	62.61	41.29	54.55	56.74	68.18	51.5	45.3	43.36	53.44	42.13	55.08	59.59
LOC108980341	0.79	0.98	0.93	0.57	0.64	0.39	24	0.83	2.2	6.22	0.48	1.42	1.88	1.69	4.67	0.77	16.65	13.3
LOC108980342	4.81	3.74	5.06	6.92	8.97	5.67	4.92	3.49	2.81	3.5	4.42	3.89	3.6	3.34	5.47	3.71	3.38	2.31
LOC108980343	10.29	10.6	9.65	15.82	11.91	12.31	11.73	9.92	10.3	29.78	42.62	46.61	10.51	15.61	11.38	9.27	13.06	12.44
LOC108980345	6.38	6.97	5.52	8.3	10.59	7.95	7.05	7.52	4.77	8.05	6.33	7.33	9.91	9.72	9.43	5.23	7.32	4.89
LOC108980347	34	33.03	31.32	46.07	43.08	41.19	59.08	28.61	59.97	42.13	46.48	37.5	20.22	26.26	42.8	41.59	29.28	31.9
LOC108980348	7.46	12.22	9.03	8.1	9.7	6.77	12.33	13.38	9.96	8.37	8.37	8.36	11.9	9.98	10.43	6.69	8.8	9.22
LOC108980349	46.53	53.65	47.91	29.06	21.33	25.75	40.26	37.63	40.61	57.04	44.48	46.05	52.94	51.54	36.08	34.42	47.04	43.12
LOC108980351	16.1	26.09	17.59	37.62	37.18	27.17	59.21	32.43	45.04	26.76	23.62	26.22	22.54	26.89	44.64	33.88	40.88	34.2
LOC108980352	6.94	6.34	6.48	3.85	3.61	2.61	0.19	3.59	2.06	4.08	2.2	6.12	2.13	2.63	2.3	0.99	1.24	1.06
LOC108980353	0.06	0.02	0.06	0.01	1.98	0.39	0.12	0.36	0.03	0.05	0	0.16	0.12	0.16	0.16	0.25	0.18	0.08
LOC108980354	0.03	0.03	0	0.06	0.09	0	0	0.03	0	0.03	0	0.03	0	0.03	0	0	0	0
LOC108980355	0	0	0	0	0.03	0	0	0	0	0.08	0	0	0	0.02	0	0	0	0
LOC108980357	54.9	36.67	40.67	39.25	22.87	60.89	8.83	23.12	14.08	19.23	9.86	22.8	15.15	21.41	17.33	14.53	32.31	11.11
LOC108980358	12.78	12.27	17.76	7.57	13.14	11.72	34.55	14.3	16.15	17.96	44.82	9.4	9.81	14.1	19.26	45.51	9.17	23.64
LOC108980359	9.27	9	9.62	8.55	7.92	7.74	11.17	6.72	7.34	9.78	8.52	11.63	7.08	8.97	6.98	5.2	8.95	7.92
LOC108980360	2.31	5.01	6.02	0.94	0.85	7.7	1.28	1.61	0.56	1.16	0.34	0.32	0.66	0.94	0.48	0.47	0.62	0.62
LOC108980362	0.06	0.13	0.18	0.69	9.19	0.44	5.93	0.13	1.09	0.82	1.65	0.23	0.54	1.77	4.76	7.22	0.85	3.41
LOC108980366	25.97	33.31	30.99	27.35	17.68	25.83	19.78	26.06	16.96	44.64	43.73	63.42	34.66	42.55	19.53	12.99	34.14	34.1
LOC108980367	27.65	28.71	26.04	43.87	41.48	36.49	24.64	26.31	31.21	24.94	25.36	27.65	29.12	29.24	32.66	28.61	22.14	24.53
LOC108980368	2.58	2.04	2.07	2.17	3.11	1.96	2.18	1.88	1.47	2.22	2.97	2.56	2.76	2.37	2.04	1.65	2.37	1.87
LOC108980372	87.92	157.96	146.36	30.94	18.18	122.62	42.52	107.2	47.99	52.98	13.44	45.35	139.04	148.33	9.52	71.17	31.31	40.93
LOC108980373	2.98	2.15	2.54	3.18	2.53	2.27	10.33	2.92	2.51	4.18	1.73	2.67	2.46	3.18	5.02	1.68	8.95	6.17
LOC108980375	2.41	1.92	3.99	1.61	2.04	8.98	2.59	2.44	2.97	1.6	0.47	2.85	1.09	4.69	3.56	1.42	1.49	5.29
LOC108980377	4.37	4.13	2.6	4.53	5	3.78	8.73	3.93	5.41	5.87	4.98	3.68	7.51	4.62	9.29	6.28	3.62	6.97
LOC108980385	0	0	0	0	0	0	0.1	0	0	0	0	0	0	0	0	0	0	0
LOC108980386	0	0	0	0	0	0	0	0	0.04	0	0	0	0	0	0	0	0	0
LOC108980387	3.71	2.35	2.93	2.71	4.09	4.49	4.69	1.86	2.74	2.5	1.21	2.7	1.92	2.1	2.97	2.2	2.71	1.81
LOC108980388	0.08	0	0	0.12	0	0.08	0	0.04	0	0	0.04	0	0	0.04	0	0	0	0
LOC108980389	0	0	0	0	0	0	0	0	0	0	0	0	0	0	0.05	0	0	0
LOC108980391	4.32	5.86	4.14	5.14	5.89	5.17	5.75	4.28	7.08	6.82	6.25	5.43	3.84	4.49	6.59	3.89	4.81	5.3
LOC108980392	15.78	11.96	13.81	20.31	22.42	20.33	14.49	10.36	10.8	10.23	6.45	11.21	25.32	15.44	12.15	8.99	13.07	12.18
LOC108980393	17.66	14.58	16.38	25.84	26.61	22.53	12.79	14.19	14.67	14.05	14.97	15.43	10.62	15.33	15.04	11.61	14.94	14.8
LOC108980394	0.06	0.06	0.18	0.13	0.13	0.19	2.05	0.07	0.52	0.56	0.19	0	0.24	0.06	0.6	0.68	1.85	1.18
LOC108980395	5.04	5.53	5.23	5.44	5.72	10.26	3.05	6.51	5.25	7.6	4.97	5.66	7.93	4.34	11.41	8.84	10.44	8.28
LOC108980397	20.71	25.64	46.06	56.9	91.55	83.48	97.14	89.53	126.98	72.16	25.78	68.32	63.32	73.5	141.43	52.26	91.27	104.59
LOC108980398	0.95	1.33	0.85	1.03	1.06	0.58	0.76	0.81	0.88	1.15	1.04	1.04	0.94	1.3	0.78	0.31	1.65	1.03
LOC108980400	5.59	6.15	5.33	4.8	5.51	5.64	4.38	5.57	4.16	3.61	4.02	3.52	4.03	5.12	3.52	4.22	3.95	4.66
LOC108980401	0	0.15	0	0	0.47	0.15	0.31	1.22	0	0	0	0.56	0	0.56	0.15	0	0	0
LOC108980402	1.16	2.34	1.3	0.23	0.55	0	0	0	0.12	0.57	0.11	0.05	0.11	0.16	0.73	0.74	1.33	0.42
LOC108980407	24.7	22.38	25.95	21.02	24.57	20.76	16.13	18.18	17.91	22.81	23.67	26.07	25.26	22.84	19.38	20.29	15.48	16.8
LOC108980408	0.06	0	0.05	0.33	0.29	0.5	0.86	0	0.11	0.55	0.11	0.26	0.74	0.47	0.69	0.05	0.11	0.57
LOC108980409	0.03	0.06	0.09	0.06	0.06	0.06	0.03	0.19	0.25	0	0	0.03	0.09	0.11	0.09	0.09	0.22	0.37
LOC108980410	0	0	0	0	0	0.03	0	0.03	0.11	0.06	0	0	0	0.02	0.05	0	0.03	0.05
LOC108980411	15.9	17.17	15.24	35.73	37.99	32.58	30.45	19.49	22.42	16.04	18.8	20.26	13.74	16.76	25.39	16.85	24.31	23.33
LOC108980412	5.48	8.93	4.95	3.99	2.4	3.52	8.01	8.54	12.2	6.85	11.39	5.37	6.38	6.46	9.34	16.35	9.33	9
LOC108980413	6.24	13.03	6.24	11.51	6.11	9.54	10.64	15.08	7.21	32.08	32.28	47.89	16.04	19.23	13.2	7.99	15.83	9.95
LOC108980416	4.57	7.73	5.45	8.17	7.92	8.2	5.77	4.3	5.36	2.88	4.84	4.28	5.2	3.95	5.85	3.48	5.53	5.05
LOC108980418	1.34	1.03	1.84	2.47	3.06	2.12	2.65	2.37	2.04	2.72	3.69	2.44	1.71	1.51	2.98	1.97	1.82	2.13
LOC108980419	12.9	14.69	15.1	6.61	9.71	12.39	24.98	23.12	20.02	25.33	28.28	30.58	18.07	37.3	23.26	25.82	17.21	18.9
LOC108980422	7.41	10.12	7.65	5.43	6.48	6.9	5.72	9.44	4.29	6.37	7.83	7.35	5.73	9.32	4.83	6.59	5.29	5.62
LOC108980423	9.43	10.42	9.1	7.39	9.46	12.35	22.55	11.21	15.37	22.08	22.51	14.73	13.33	12.29	15.71	16	11.75	16.31
LOC108980424	19.28	18.48	18.86	20.14	19.8	24.27	15.21	13.59	18.27	21.82	37.22	20.06	22.81	14.07	14.44	18.76	16.34	19.6
LOC108980428	0	0	0	0	0.33	0	0	0	0	0	0	0	0	0	0	0	0	0
LOC108980430	50.28	52.07	47.85	87.19	104.96	75.96	78.8	53.55	68.29	56.7	57.12	59.31	41.49	55.68	84.35	46.48	83.8	76.32
LOC108980431	5.58	4.72	3.12	2.9	2.23	1.47	8.5	0.49	4.54	2.32	5.58	1.9	0.54	0.29	6.69	4.82	5.76	4.63
LOC108980432	15.62	23.01	21.72	17.08	20.59	18.42	16.01	26.63	13.04	16.57	16.63	18.91	18.24	25.03	16.08	15.42	10.96	10.97
LOC108980433	5.35	5.47	5.24	3.5	4.03	4.51	4.57	5.89	4.6	3.85	3.22	4.11	8.06	7.23	3.2	3.43	4.01	3.7
LOC108980434	12.21	10.4	10.3	24	23.93	20.89	15.27	12.59	12.27	12.8	13.08	14.58	7.13	12.6	16.28	12.65	13.51	12.71
LOC108980435	9	10.59	11.71	13.12	10.54	12.3	10.22	8.36	8.25	10.57	4.89	6.25	4.74	5.92	8.02	9.57	12.25	9.36
LOC108980440	8.02	11.32	10.21	4.06	3.68	3.78	9.45	8.15	7.31	6.93	3.99	6.53	12.27	9.66	6.16	5.33	6.77	7.3
LOC108980441	1.96	2.86	2.8	2.27	3.42	0.66	1.98	2.33	1.24	3.08	3.7	4.32	4.14	4.15	3.14	1.71	0.61	0.79
LOC108980442	75.47	84.51	82.6	55.03	41.06	49.42	20.82	79.04	36.53	63.91	89.6	88.31	74.21	93.27	37.74	114.47	33.85	54.14
LOC108980443	88.13	89.25	116.24	26.03	22.45	28.6	20.19	262.51	33.14	105.08	47.6	79.43	340.29	360.84	15.39	59.41	34.11	105.67
LOC108980444	0	0	0	0.03	0	0.19	0.03	0	0.1	0.38	0	0	0.09	0	0.1	0.06	0.49	1
LOC108980445	0.23	0.31	0.08	0.31	0.25	0	0.16	0.4	0.16	2.64	0.91	0.51	4.6	1.46	3.31	4.24	3.87	3.19
LOC108980446	28.38	29.86	30.1	23.21	24.36	24.28	17.56	32.22	21.5	27.88	29.57	26.68	32.58	36.45	18.71	23.81	19.9	25.84
LOC108980447	13.09	15.88	14.86	8.06	7.09	7.75	8.88	12.25	6.69	9.21	8.05	9.51	11.89	10.75	6.98	9.83	8.2	7.7
LOC108980448	75.11	59.55	66.43	56.75	45.13	54.91	44.67	69.79	51.94	48.69	55.68	73.86	65.03	76.35	43.01	36.37	48.84	49.34
LOC108980449	11.53	16.76	12.92	18.57	20.13	15	24.17	14.37	18.48	16.95	15.76	18.37	12.95	14.53	21.5	16.96	19.26	17.03
LOC108980450	4.56	5.47	4.88	8.23	8.7	7.81	11.07	5.45	10.76	7.83	7.27	6.85	4.56	6.1	10.98	5.73	7.48	7.73
LOC108980451	23.13	26.09	22.01	7.43	7.44	12.71	16.08	29.9	15.04	22.98	24.68	18.9	47.13	34.4	6.9	15.15	14.09	19.78
LOC108980454	0.05	0.05	0.11	0.22	0.37	0	0.25	0.06	0.28	0.15	0	0.05	0.18	0.44	0.71	1.17	0.14	0.06
LOC108980456	0.18	0.18	0.48	0.24	0.5	0.26	1.14	0.22	0.31	0.33	0.21	0.48	0.25	0.32	0.5	0.12	0.47	0.2
LOC108980457	1.38	3.34	3.51	1.38	1.97	5.07	1.82	2.13	0.87	1.35	0.32	1.66	0.72	1.84	0.19	1.59	0.19	0.43
LOC108980458	6.38	10.34	7.98	2.99	1.94	7.84	3.47	6.15	3.77	5.67	4.78	5.31	7.39	6.12	1.45	5.59	2.94	4.05
LOC108980459	7.03	2.6	4.74	5.15	1.23	9.4	0.15	2.17	0.22	2.24	2.75	6.62	0.94	0.76	0.19	0.85	0.08	0.3
LOC108980460	143.39	144.68	106.77	714.7	297.69	400	1442.45	401.8	961.28	1066.68	1301.51	751.85	285.3	395.1	553.91	291.25	989.94	821.49
LOC108980462	17.05	16.25	18.73	18.63	19.38	16.35	15.11	18.24	15.66	18.69	17.99	18.5	15.19	20.1	16.31	13.77	17.41	16.87
LOC108980463	0.8	1.76	2.18	2.77	0.24	2.11	0.83	0.16	1.02	3.38	1.6	2.1	0	0.39	1.51	0.11	0.12	0.04
LOC108980464	0.59	0.8	0.7	0.79	0.9	1.51	0.67	1.32	0.6	0.92	0.84	1.05	0.82	0.88	1.09	0.41	0.45	0.55
LOC108980465	6.22	5.39	6.86	4.24	6.79	4.94	4.97	6.15	4.34	7.51	8.48	6.62	6.18	5.67	5.03	3.26	5.02	6
LOC108980467	9.05	9.99	9.91	9.29	9.91	8.99	4.61	8.81	5.32	6.88	6.85	8.25	7.34	8.46	6.2	5.25	6.58	5.47
LOC108980469	0	0	0	0	0	0	0.17	0	0	0.11	0	0	0	0	0.03	0	0.5	0.7
LOC108980472	16.74	12.82	15.99	9.39	9.29	8.58	7.36	12.67	7.91	13.01	13.2	11.13	10.16	11.02	9.1	10.13	9.51	9.11
LOC108980473	0.06	0.25	0.15	0.19	0	0.26	0.2	0.03	0.07	0.76	0.06	0.41	0.15	0.03	0.13	0.03	0.03	0.13
LOC108980475	0.81	0.57	0.76	0.94	1.11	1.11	0.53	1.08	0.25	0.95	0.4	0.71	0.36	0.69	0.17	0.26	0.06	0.03
LOC108980476	4.99	42.52	6.72	10.73	12.72	10.38	23.74	18.93	28.54	8.91	7.3	9.3	22.58	16.16	32.58	31.76	23.08	22.47
LOC108980477	0.49	0.9	0.47	3.24	5.14	3.77	4.48	0.92	2.23	2.59	0.48	2.35	2.51	3.49	5.34	1.32	3.7	4.31
LOC108980480	0	0	0	0	0	0	0.07	0	0	0	0	0	0	0	0	0	0	0
LOC108980481	0.47	0.29	0.46	0.09	0.4	0	0	0.39	0.1	0.52	1.21	0.53	1.36	0.62	0.3	0.28	0	0
LOC108980483	0	0	0.11	0.24	0	0	0	0	0	0.26	0.12	0	0	0	0	0	0	0.36
LOC108980485	0.12	0	0.12	0.25	0.59	0.31	4.34	0	1.98	0.48	0	0.06	0.12	0.23	2.27	0.24	2.07	1.09
LOC108980486	8	8.33	5.98	4.78	5.45	3.56	3.11	8.24	3.59	5.12	4.2	8.68	5.68	9.23	3.04	3.8	3.78	3.87
LOC108980487	1.96	2.03	1.7	4.61	4.2	3.58	11.13	3.72	6.81	6.68	6.61	6.97	1.78	2.92	8.19	3.3	8.07	6.06
LOC108980488	9.54	11.29	9.22	14.58	17.87	14.48	10.51	11.35	9.15	9.39	5.7	9.99	12.99	11.08	12.51	6.44	8.76	7.46
LOC108980489	3.44	3	3.87	5.64	4.4	4.45	11.23	4.91	9.33	10.68	8.22	4.87	6.49	6.24	8.97	4.94	12.48	10.45
LOC108980490	0	0	0.08	0.08	0	0	0	0	0	0	0.16	0.04	0.04	0	0.04	0	0	0
LOC108980493	0.66	0.92	0.27	0.73	1.18	2.43	4.92	1.97	2.12	2.99	2.19	1.97	2.28	1.19	4.55	2.12	1.56	2.05
LOC108980498	1.69	1.44	1.84	1.63	4.5	2.97	5.28	3.22	3.75	3.1	1.94	3.79	3.12	3.84	5.88	6.89	3.88	3.12
LOC108980503	29.33	19.34	26.13	14.79	11.61	16.86	10.94	21.32	14.98	20.11	22.9	21.53	26.72	26.93	12.53	26.48	13.2	17.32
LOC108980504	4.16	5.58	4.97	10	12.19	8.06	13.96	6.66	9.77	8.82	6.89	7.02	7.69	5.89	11.49	7.57	8.66	10.84
LOC108980510	4.68	7.35	4.8	4.64	4.48	4.57	10.95	8.84	18.21	19.42	6.37	5.68	9.98	10.02	17.36	2.65	8.33	3.67
LOC108980512	0.04	0	0	1.63	5.21	1.89	21.93	0.53	15.16	8.72	3.11	0.05	1	0.75	7.85	3.25	0.36	5.07
LOC108980515	0.31	0.67	0.23	0.3	0.12	0.06	9.24	1.58	1.93	3.76	2.14	0.42	1.26	0.23	10.84	0.38	14.98	4.33
LOC108980516	29.24	36.51	21.55	13.66	15.77	18.39	5.94	15.66	11	12.7	11.04	11.12	10.77	9.24	31.55	11.28	9	5.7
LOC108980519	0.07	0.11	0	0.11	0.35	0.18	0	0.15	0.04	0.16	0	0.34	0.42	0.21	0.08	0.14	0.23	0.04
LOC108980520	0.43	0.55	0.95	2.99	31.63	13.85	8.28	3.85	6.77	1.63	0.92	2.84	0.76	1.5	16.75	3.64	3.04	5.13
LOC108980521	31.09	28.4	34	33.69	38.52	33.55	28.19	28.06	36.59	30.9	36.55	32.07	25.83	29.62	40.23	41	29.95	38.46
LOC108980522	0	0.25	0.05	0	0.26	0.85	0.46	0.2	0.26	0.11	0.19	0.28	0.43	0	0.83	0.15	0	0.1
LOC108980523	56.96	42.71	57.68	65.88	67.37	54.24	29.14	50.14	37.19	45.79	54.68	57.08	49.78	47.22	40.06	38.27	40.14	41.81
LOC108980524	1.23	11.47	11.84	0.61	0.15	4.59	0.05	1.22	0.05	0.42	0.23	0.13	0.55	0.72	0.1	0.09	0	0.39
LOC108980528	0	0.29	0.24	0.2	0.09	0.17	0.09	0.08	0.08	0.05	0.12	0.12	0	0.15	0.21	0.16	0.26	0.04
LOC108980530	2.55	1.37	3.14	105.09	197.63	82.73	59.58	18.06	101.55	14.08	15.2	5.03	11.37	9.05	121.03	64.47	28.82	26.04
LOC108980531	0.11	0.39	0.14	0.14	1.95	1.04	0.37	0.58	1.02	0	0.03	0.43	0.14	0.2	0.74	0	0.04	0.18
LOC108980533	0.02	0	0	0	0	0	0	0	0	0	0.02	0	0	0	0	0	0	0
LOC108980535	9.69	13.34	9.57	5.63	8.14	4.87	8.64	7.77	5.79	5.58	4.58	11.46	5.84	12.05	8.85	6.02	8.05	5.62
LOC108980536	0.08	0.11	0.08	0.04	0.12	0	0.55	0.06	0.14	1.47	0.07	0.1	0.12	0.35	1.02	0.61	1.84	2.18
LOC108980538	0	0	0	0	0.11	0.07	0.07	0.29	0	0	0	0	0.03	0.07	0.22	0.21	0.41	0.15
LOC108980539	7.6	3.45	3.87	2.23	2.22	9.08	15.56	10.33	5.21	8.34	6.76	6.47	3.88	6.02	8.55	49.48	6.4	7.22
LOC108980540	24.27	18.75	18.44	10.81	8.02	11.5	4.4	21.73	7.29	18.41	30.38	20.55	26.93	15.64	7.47	9.08	4.78	4.64
LOC108980541	26.46	26.49	27.32	20.67	15.94	22.69	12.27	23.46	14.47	18.9	22.84	20.85	16.25	20.09	10.73	25.57	14.32	13.46
LOC108980542	25.03	12.71	24.69	14.97	11.46	12.28	5.64	9.69	9.22	10.2	15.71	11.77	6.82	9.33	11.33	9.85	7.47	7.93
LOC108980543	53.87	27.28	43.14	47.34	26.82	43.63	16	57.42	20.82	58.81	70.71	46.33	40.39	28.98	13.75	40.71	36.21	55.7
LOC108980544	4.23	5.61	6.54	3.33	4.33	7.98	2.38	6.62	3.24	5.01	3.63	5.11	4.11	6.32	1.65	3.92	2.81	3.72
LOC108980545	0.57	2.42	3.31	0.65	16.02	1.81	0.14	1.39	0.13	0.86	0.64	0.7	1.42	3.7	3.09	4.27	0.86	0.67
LOC108980547	101.88	91.97	96.2	110.31	101.31	125.95	87.42	79.78	81.53	70.93	66.83	105.68	135.27	95.33	87.74	79.53	83.99	103.32
LOC108980550	0	0	0	0	0.41	0	0	0	0	0	0	0	0	0	0	0	0	0
LOC108980551	0	0.15	0	0	0.08	0	0	0	0	0	0	0	0	0.14	0.3	0.5	0.23	0.15
LOC108980553	0.61	0.52	0.52	0.27	0.36	0.27	2.29	1.64	1.24	0.67	0.97	0.48	0.74	0.83	0.98	0.74	0.86	1.32
LOC108980555	0.3	0.38	0.25	0.05	0.13	0.1	1.37	0.55	0.13	0.17	0.02	0.07	0.27	0.38	0.42	0.42	0.34	0.52
LOC108980556	2.37	3.08	1.94	4.2	9.13	5.42	28.03	3.51	21.35	20.11	1.7	3.65	6.65	6.85	30.88	6.49	36.14	42.42
LOC108980557	3.84	3.61	4.32	11.19	11.5	8.39	14.53	6.14	10.54	11.87	3.47	7.86	3.3	4.66	11.82	5.41	10.92	9.73
LOC108980558	189.44	212.3	194.16	181.72	175.3	149.89	277.7	180.81	278.15	324.59	221.88	218.52	308.44	219.3	263.96	194.62	222.99	255.38
LOC108980559	4.16	2.77	6.24	15.4	17.82	4.35	8.29	11.09	8.29	8.4	3.42	5.66	4.39	3.17	10.65	5.16	7.8	6.22
LOC108980561	6.06	8.65	8.57	5.18	6.88	3.75	4.1	10.37	5.26	7.28	7.08	8.18	7.68	9.06	4.5	6.33	7.87	6.03
LOC108980563	22.49	14.18	19.93	13.98	11.02	15.71	5.17	7.96	6.37	10.78	11.83	14.62	8.05	8.67	5.68	6.5	5.62	7.4
LOC108980565	0.28	0.21	0.07	0	0.07	0	0.07	0	0.07	0	0	0	0.07	0.2	0	0	0	0
LOC108980566	7.23	6.78	6.54	10.27	7.5	10.12	11.76	8.88	8.94	10.85	11.57	9.56	6.29	5.27	8.61	8.19	7.9	10
LOC108980567	1.4	1.12	0.86	2.77	2.36	1.36	2.87	1.04	3.29	3.65	2.24	2.31	2.19	1.79	4.22	2.97	4.75	4.51
LOC108980569	0.16	0.19	0.63	0.11	0.91	0.84	3.97	15.64	14.95	1.96	1.4	2.38	12.8	15.02	19.3	8.19	0.93	0.14
LOC108980573	11.46	13.51	12.46	13.27	14.16	12.5	8.96	14.23	10.28	8.36	10.8	11.38	5.89	13.22	10.54	9.25	9.89	9.03
LOC108980574	17.93	18.6	18.83	20.93	17.87	18.97	15.1	17.62	10.27	12.14	10.22	19.41	23.28	23.66	13.46	9.72	17.36	16.11
LOC108980577	3.21	2.82	4.11	2.15	4.38	2.59	1.97	2.81	1.77	1.66	1.86	2.21	1.93	2.61	1.55	2.37	2.91	1.35
LOC108980580	8.41	7.68	10.2	10.27	9.79	11.24	9.88	11.58	10.57	10.86	10.15	9.08	7.49	9.79	10.73	9.22	7.08	10.75
LOC108980581	44.98	47.92	47.99	30.95	25.48	29.86	28.02	39.95	25.39	43.1	42.03	44.52	48.02	46.92	31.37	27.49	28.39	28.55
LOC108980582	18.07	22.01	20.33	18.55	19.97	18.98	13.39	20.83	14	15.27	18.7	22.39	22.07	23.46	15.34	21.57	18.33	16.63
LOC108980586	0.11	0	0.11	0.11	0.12	0.06	0.35	0.23	0.12	0.19	0.11	0.16	0.27	0.27	0.29	0.22	0.24	0
LOC108980589	60.03	63.36	59.61	63.12	57.11	47.41	53.43	63.58	63.05	61.93	69.54	55.2	48.5	63.35	55.62	61.44	56.59	59.91
LOC108980590	15.55	16.54	15.28	31.68	49.16	26.97	35.75	14.79	32.77	18.51	19.8	18.34	13.94	13.59	30.29	20.62	20.57	19.74
LOC108980593	0.09	0.09	0.22	0	0.04	0.08	0.03	0	0	0.03	0.01	0	0	0	0.06	0	0	0.07
LOC108980594	9.81	12.86	11.7	11.82	15.13	10.25	12.52	14.92	12.2	13.87	14.41	14.42	14.4	13.94	15.89	12.88	12.02	10.51
LOC108980595	9.86	10.4	10.31	16.71	16.74	12.46	18.85	18.43	18.27	21.26	19.03	15.65	16.99	14.71	20.66	10.66	19.12	16.35
LOC108980597	0.61	1.07	0.79	0.96	2.4	3.47	0.84	2.07	2.24	1.83	2.13	3.5	3.77	3.72	4.32	0.94	2.21	1.51
LOC108980599	7.76	9.01	10.06	6.96	6.96	7.83	11.63	11.19	10.9	7.72	8.24	11.17	8.95	11.24	11.08	17.05	9.33	9.96
LOC108980600	20.98	22.65	19.36	34.5	39.31	26.72	38.31	25.48	33.27	26.48	22.21	23.04	24.54	22.68	48.15	24.36	31.56	29.68
LOC108980602	23.97	22.04	23.25	24.38	18.21	22.04	29.67	19.06	25.96	29.27	27.34	25.56	33.78	24.38	28.29	24.86	33.63	32.08
LOC108980606	12.89	9.56	12.03	8.84	5.99	8.24	1.55	3.36	1.13	0.6	0.65	0.15	2.39	1.51	0.28	5.84	6.7	4.42
LOC108980608	0.95	0.45	0.82	0.25	0.69	0	2.08	2.25	0.67	0.93	0.1	1.03	2.82	0.8	0.83	0.88	0.67	0.36
LOC108980609	0	0.05	0.05	0.56	0.05	0.05	0.2	0	0.19	0.1	0	0.09	0	0.09	0.05	0.09	0.15	0.19
LOC108980610	0	0	0	0	0	0	0	0	0	0.08	0	0	0	0.07	0	0	0	0
LOC108980611	0	0	0	0	0.11	0	0	0	0	0	0	0	0	0	0	0	0	0
LOC108980613	21.19	21.19	21.67	19.28	17.97	18.49	12.92	18.31	14.14	15.22	17.08	20.01	15.43	16.44	13.03	17.8	13.98	17.13
LOC108980615	3.06	5.08	4.33	1.3	0.59	4.07	1.07	2.75	0.62	2.61	1.44	2.23	2.28	3.08	0.22	0.89	0.75	1.03
LOC108980616	3.55	2.78	3.3	2.4	3.13	4.65	1.84	2.15	1.52	0.85	1.04	1.34	1.67	2.35	2.9	2.16	1.42	1.43
LOC108980618	0.04	0.13	0.09	0.02	0.05	0.16	0.85	0.16	0.25	0.15	0.06	0.08	0.08	0.17	0.41	0.47	0.3	0.14
LOC108980619	0	0	0	0.52	0.86	0.19	15.75	0.1	6.73	1.15	1.31	0	0.27	0.18	10.04	3.87	10.67	35.25
LOC108980620	25.72	27.7	26.62	39.96	39.06	25.66	40.43	33.32	38.15	40.37	48.57	37.13	47.58	42.06	43.92	29.18	34.03	37.82
LOC108980621	49.49	25.04	41.16	21.22	11.17	29.25	10.57	44.68	13.42	50.62	77.84	59.4	34.28	26.97	19.38	24.72	9.08	19.93
LOC108980623	551.32	429.18	512.79	66.28	166.29	503.67	309.3	492.25	250.08	269.87	294.42	366.43	271.81	423.35	248.93	743.47	257.65	251.28
LOC108980625	5.45	4.82	6.32	6.23	3.75	6.52	7.38	3.65	4.8	7.16	8.07	6.34	5.55	5.18	4.16	8.52	7.03	7.29
LOC108980627	0	0	0	0	0.23	0.16	0	0	0	0.06	0.05	0	0	0	0.06	0.16	0	0.17
LOC108980628	10.33	19.73	11.01	11.87	3.81	11.14	22.81	12.95	17.05	28.31	30.1	35.87	19.45	24.54	13.66	13.01	22.62	24.22
LOC108980631	0.08	0	0.23	0	0	0	0	0.16	0	0.17	0.04	0.15	0.08	0	0.04	0	0.04	0.12
LOC108980632	31.92	36.38	31.56	38.34	39.81	35.8	30.99	27.29	32.92	35.5	35.67	42.27	27.41	35.83	40.71	31.48	32.08	27.64
LOC108980633	39.03	36.02	36.16	25.93	25.37	21.57	16.22	41.42	19.32	27.25	19.78	36.55	89.33	63.77	18.75	23.46	31.02	25.9
LOC108980634	14.36	31.25	16.39	3.32	16.93	46.41	71.96	51.56	14.57	99.31	155.35	176.3	39	123.84	55.3	122.87	50.32	62.07
LOC108980635	0	0.05	0	0	0	0	0	0	0	0	0	0	0	0	0	0	0	0
LOC108980636	6.76	1.96	16.95	6.26	18.15	38.53	11.07	15.8	32.25	0.53	1	1.49	2.02	9.41	29.65	44.7	14.5	7.39
LOC108980644	17.5	21.87	15.37	17.2	18.33	22.91	8.49	16.31	11.01	14.27	11.45	14.9	20.45	17.06	11.94	12.87	11.81	11.19
LOC108980648	1.06	1.13	1.27	1.08	0.94	0.84	8.72	1.19	1.53	3.94	1.4	1.59	1.94	1.35	7.18	1.58	7.1	6.97
LOC108980649	12.32	15.24	13.14	21.93	20.53	20.24	27.34	17.2	32.62	21.59	20.66	21.8	19.71	17.24	31.26	16.91	25.36	21.31
LOC108980650	9.54	7.96	8.67	9.1	7.41	9.68	7.59	9.26	8.69	14.02	13.09	12.31	9.6	8.03	7.64	5.87	7.44	6.71
LOC108980651	49.09	75.38	50.67	46.93	39.66	37.72	64.19	64.7	60.44	76.09	59.59	67.88	75.67	65.27	76.7	66.94	69.75	58.32
LOC108980652	38.11	33.58	35.69	35.32	23.69	20.09	36.59	35.45	44.38	45.16	61.35	38.8	26.94	30.8	34.52	28.5	39.66	36.67
LOC108980655	97.71	79.16	83.58	42.01	29.09	22.77	22.44	41.08	14.64	9.67	2.5	30.04	25.68	30.1	10.2	4.04	24.93	11.92
LOC108980657	7.24	8.69	7.67	4.16	6.66	4.25	7.07	9.44	3.54	7.23	5.53	5.79	8.15	9.26	5.75	6.16	4.25	5.47
LOC108980658	0.35	0.5	0.93	0.88	1.87	2.53	0.85	0.43	0.87	0.19	0.31	0.26	0.54	0.63	0.77	0.31	0.48	0.4
LOC108980659	2.11	2.72	0.83	0.79	0.7	0.66	6.18	2.3	5.9	10.42	5.1	1.91	7.32	3.35	6.32	7.93	11.17	7.05
LOC108980660	14.39	11.18	13.6	12.25	11.22	13.31	11.19	14.05	11.27	16.7	18.29	16.85	10.74	11.61	12.06	12.59	10.14	12.47
LOC108980661	27.39	32.49	26.02	28.76	30.86	32.06	38.26	32.83	33.84	33.76	27.34	33.51	45.31	38.06	34.42	15.59	32.29	34.5
LOC108980663	0	0.04	0.04	0	7.39	0	0.02	0.1	0.19	0	0.02	0.12	0	0.02	0.1	0.07	0	0.02
LOC108980665	7.85	5.99	8.89	8.06	8.17	9.35	6.44	8.9	5.14	9.65	8.61	10.36	10.02	8.74	6.69	4.53	5.32	7.09
LOC108980667	110.17	84.93	105.95	83.45	64.88	67.23	29.13	34.97	25.78	8.61	6.85	7.01	13.27	16.91	10.14	57.55	62.28	37.54
LOC108980668	9.48	10.46	9.91	8.27	16.89	7.79	9.42	9.11	13.96	18.18	5.95	12.35	8.19	8.82	16.5	5.36	10.26	10.72
LOC108980670	13.23	4.96	8.7	10.08	10.47	20.33	7.11	11.17	7.95	13.6	3.54	9.48	6.94	7.28	4.78	6.16	6.89	5.36
LOC108980672	3.39	4.35	3.37	9.53	10.04	10.95	10.53	5.38	9.17	7.64	7.47	8.46	4.51	6.14	9.55	8.08	6.48	5.43
LOC108980673	2.42	4.14	4.5	1.79	9.9	20.05	9.36	21.47	4.87	3.19	2.44	11.21	5.53	13.52	6.59	12.91	4.13	2.95
LOC108980674	0	0	0	0	0.1	0	0.58	0.66	0.66	2.53	1.53	0.17	5.64	0.43	6.24	0.27	4.12	0.95
LOC108980675	0	0	0.04	0.06	0.8	0.64	0.64	0.31	0.29	0.02	0.41	0.13	0	0.41	0.52	0.6	0.17	0.16
LOC108980679	0.17	0.18	0	0.09	0	0	0.27	0	0	0.19	0	0	0.17	0	1	0	0.64	0.09
LOC108980680	8.66	8.5	14.01	146.52	34.53	11.35	8.27	136.37	43.12	53.78	50.13	23.41	33.21	16.5	69.98	7.47	295.87	295.64
LOC108980681	0.07	0.04	0.14	0	1.64	0.5	0.85	0.33	0.58	0.39	0.17	0.33	0.14	0.5	0.92	0.48	0.95	0.51
LOC108980683	940.81	945.12	1068.92	1837.06	1198.68	1705.45	1783.93	1329.31	1657.92	856.45	1178.35	491.75	1332.36	1393.63	838.84	2279.8	1325.38	1428.62
LOC108980684	0.17	0.12	0.14	0	0.13	0.02	0.59	0.05	0.08	0.13	0.17	0.02	0.09	0.19	0.38	0.43	0.36	0.15
LOC108980685	7.24	5.38	5.62	6.75	8.56	6.48	10.28	4.93	7.55	4.13	4.18	4.39	4.88	5.4	7.18	6.59	8.16	7.39
LOC108980687	55.75	53.53	52.67	105.61	108.41	78.02	70.07	44.85	72.79	57.08	59.77	59.42	42.98	51.51	85.4	51.82	81.78	72.61
LOC108980688	0.98	0.69	0.74	0.81	5.44	2.64	12.99	2.88	6.22	5.11	11.17	4.77	2.55	11.27	28.45	13.28	7.67	14.34
LOC108980690	0.29	0.11	0.35	0.52	0.38	0.32	0.21	0.25	0.09	0.12	0.64	0.28	0.39	0.17	0.26	0.13	0.45	0.37
LOC108980691	0	0	0	0	0	0	0	0	0	0	0	0	0.09	0	0	0.13	0	0
LOC108980693	1.82	1.97	1.64	5.08	2.02	5.33	2.04	4.11	3.7	9.19	6.19	15.01	5.45	6.18	3.46	1.29	4.54	3.42
LOC108980694	0.11	0.03	0.08	0.17	0.24	0	0.33	0.15	0.06	0	0.08	0.13	0.16	0.4	0.18	0.17	0.15	0.47
LOC108980696	0	0	0	0	0	0	0	0	0	0.04	0	0	0	0	0	0	0	0.02
LOC108980698	24.13	47.07	22.63	43.29	43.44	34.73	255.98	102.33	188.73	88.73	60.72	44.7	43.52	36.66	187.78	36.12	64.13	62.44
LOC108980699	0	0	0	0	1.35	0.15	0.27	0.05	0	0.06	0	0.43	0.1	0.24	0.05	0.25	0.58	0.1
LOC108980700	5.22	5.43	5.07	4.57	4.31	4.75	3.92	4.1	3.51	5.1	3.82	5.08	3.85	4.16	3.18	3.74	4.77	3.81
LOC108980701	0.25	0.25	0.12	0	0	0.13	0.13	0.13	0.39	0	0.25	0	0.73	0.36	0	0	0.66	0
LOC108980703	17.48	17.37	14.72	44.09	28.46	42.09	31.55	27.27	29.07	48.04	32.97	40.18	36.39	38.07	52.58	36.8	42.57	29.28
LOC108980704	0	0	0	0	0	0	0.03	0	0	0	0	0	0	0	0	0	0	0
LOC108980706	0.24	0.64	0.33	0.39	0.26	0.44	0.3	0.4	0.35	0.16	0.19	0.05	0.51	0.05	0.51	0.81	0.05	0.35
LOC108980707	12.71	14.87	14.55	11.56	11.31	10.58	21	17.64	16.96	14.04	6.92	12.07	23.44	17.51	21.8	49.83	23.9	17.53
LOC108980711	0.24	0.04	0.21	0.34	0.06	0.24	0.09	0.24	0	0.42	0.11	0.41	0.44	0.46	0.17	0.16	0.17	0.28
LOC108980714	0.05	0	0	0	0.11	0.21	0.32	0.1	0.11	0.11	0	0.14	0.15	0.05	0.21	0	0.16	0.05
LOC108980717	20.3	15.65	20.52	24.41	24.37	22.82	13.24	12.75	21.97	13.44	18.16	17.72	10.89	14.11	21.44	16.09	13.71	13.78
LOC108980718	9.77	9.15	13.77	5.54	4.86	4.97	10.26	10.55	9.21	15.35	16.59	17.85	9.17	7.77	9.07	9.69	5.32	6.03
LOC108980727	10.73	15.25	11.23	34.95	40.63	33.1	39.86	18.85	28.53	21.58	19.96	17.47	18.5	16.76	36.02	16.02	36.97	26.7
LOC108980728	0	0.08	0.07	0.05	0.48	0.46	0.37	0.45	0.22	0.04	0.1	0.08	0.35	0.39	0.66	0.11	0.16	0.24
LOC108980729	0.1	0.06	0.21	0.14	4.82	0.05	0.05	0.33	0.13	0.2	0.07	0.34	0.06	0.34	0.19	0.29	0.14	0.08
LOC108980731	2.67	0.77	2.38	2.18	2.68	2.1	0.39	0.67	0.47	0.91	2.51	1.52	0.6	1.23	0.53	0.95	1.01	0.23
LOC108980733	0	0	0	0	0.58	0.04	1.91	0.16	0.32	0.26	0.08	0.07	0.04	0	0.41	0.04	0.33	1.45
LOC108980734	0	0	0	0	0	0	0	0	0	0	0	0.04	0	0	0	0	0	0
LOC108980735	0	0	0	0	0	0	0	0	0	0.04	0	0	0	0	0	0	0	0
LOC108980737	0	0	0	0	0	0.04	0.09	0.13	0.08	0.18	0	0.35	0.08	0.12	0	0.24	0	0.17
LOC108980738	0.69	0.9	0.87	0.4	1.15	0.2	0.15	1.63	0.51	0.87	0.24	1.16	1.99	0.75	0.67	0.24	0.15	0
LOC108980739	1.61	2.14	3.13	0.88	10.45	3.54	0.38	2.48	0.38	0.48	1.65	2.61	5.05	4.55	0.84	1.15	1.14	1.43
LOC108980740	227.3	203.92	223.89	271.64	253.8	202.23	157.02	191.44	200.55	163.44	199.74	192.92	189.69	204.47	169.6	165.01	198.61	187.09
LOC108980741	0	0	0	0	0	0	0.09	0	0	0	0	0	0	0	0	0	0.04	0
LOC108980742	0	0.02	0	0	0.04	0	0.04	0.11	0	0	0	0	0.07	0	0	0.02	0.04	0.08
LOC108980743	24.8	23.97	22.83	27.17	18.13	21	24.27	24.35	26.39	26.8	31.56	31.65	23.16	23.59	25.22	20.2	28.89	26.36
LOC108980744	6.94	9.84	7.94	10.26	14.17	9.06	13.45	10.76	10.14	8.13	6.72	9.51	10.26	9.61	15.3	7.8	6.73	6.43
LOC108980754	21.77	19.84	21.66	28.05	28.47	25.07	21.46	33.64	23.72	27.8	14.14	26.17	38.13	27.03	30.04	17.5	32.96	24.48
LOC108980756	17.53	17.7	18.24	31.11	32.55	23.23	21.59	21.17	21.74	20.47	20.97	20.1	23.52	18.9	22.33	19.28	18.42	25.3
LOC108980758	0.19	0.54	0.29	0.06	0.39	0.11	0.23	0.13	0.18	0.21	0.13	0.47	0.35	0.22	0.59	0.13	0.31	0
LOC108980759	10.54	48.72	18.12	22.23	24.87	32.14	242.99	65.04	122.72	41.9	16.74	14.11	66.78	28.5	90.65	47.12	66.39	49.78
LOC108980760	62.29	75.46	69.75	134.49	88.82	53.81	42.01	79.92	69.87	44.11	36.81	48.91	35.34	31.32	93.78	22.11	76.85	51.63
LOC108980761	7.43	8.81	6.38	11.39	9.35	13.34	16.95	12.3	16.58	17.38	19.49	14.56	11.42	11.18	18.09	11.95	15.26	16.97
LOC108980762	5.42	19.02	16.51	31.42	184.66	29.14	52.97	141.71	207.8	185.63	266.4	140.99	32.34	18.97	253.17	438.9	90.38	151.6
LOC108980763	1.62	2.16	1.94	0.61	1.72	1.08	1.39	1.46	0.66	1.62	1.05	1.77	1.91	2.6	1.96	0.77	2.56	3.4
LOC108980764	0	0.13	0.32	0.13	0.21	0.07	0	0.07	0	0.22	0.72	0.06	0.06	0.31	0.49	0.13	0.42	0.27
LOC108980765	0	0	0	0	0	0	0	0	0	0	0.1	0	0	0	0	0	0	0
LOC108980768	32.84	24.77	30.68	23.21	16.34	23.08	20.7	27.98	20.03	28.8	29.11	27.56	14.47	21.42	15.75	18.57	21.24	22.28
LOC108980769	3.15	2.55	3.41	2.53	3.57	3.4	2.26	2.55	2	2.51	4.16	2.21	1.08	2.51	2.56	2.77	2.13	2.34
LOC108980770	103.93	89.38	104.15	157.8	144.43	127.6	130.54	151.64	182.63	153.07	185.38	102.77	96.48	131.87	144.21	169.31	171.67	147.51
LOC108980771	9.69	9.42	11.78	15.44	17.95	10.03	38.94	12.62	30.67	20.01	17.63	14.62	15.58	14.15	29.74	19.3	24.99	24.39
LOC108980772	6.97	6.27	6.82	9.8	11.29	11.05	8.32	5.41	4.38	7.92	6.87	8.79	4.46	5.58	8.84	5.62	5.05	5.3
LOC108980773	7.92	9.22	8.76	5.85	5.87	4.32	4.66	5.91	4.3	6.74	4.19	8.15	7.99	7.82	6.71	4	5.04	5.74
LOC108980777	2.16	1.89	2.12	1.76	7.77	9.22	6.04	9.37	5.63	2.17	1.73	2.33	2.86	4.05	5.7	15.75	6.42	4.37
LOC108980779	0.83	0.25	1.69	1.08	2.15	5.72	3.53	5.06	9.1	1	0.34	1.4	4.49	3.66	9.54	6	14.12	7.23
LOC108980780	0.77	2.99	7.78	34.26	33.81	46.42	495.45	13.61	105.29	49.67	92.43	8.98	6.56	11.97	131.29	111.64	74.92	186.4
LOC108980781	27.63	30.27	27.61	30.38	28.87	28.21	20.85	24.64	22.37	22.65	25.26	26.76	20.56	25.45	22.42	24.89	20.99	24.9
LOC108980782	19.65	18.98	20.94	16.97	14.29	13.15	25.82	21	19.7	17.5	20.21	20.21	18.47	18.34	25.66	19.46	31.29	23.18
LOC108980784	23.08	24.79	23.14	25.04	27.04	20.53	24.11	22.47	29.27	27.8	28.88	23.22	24.48	24.29	25.64	19.86	24.99	26.56
LOC108980785	21.58	9.6	27.57	76.81	47.34	50.58	4.78	52.93	24.04	28.63	18.78	29.26	36.1	23.11	29.84	7.95	31.87	33.51
LOC108980788	11.08	11.72	11.15	16.81	16.16	14.28	14.46	14.06	14.86	15.93	13.92	12.94	11.26	13.58	19.18	10.93	15.01	12.54
LOC108980789	0.21	0.38	0.77	0.88	0.56	0.8	3.61	0.45	1.12	1.48	0.8	0.58	0.31	0.72	1.86	0.8	1.89	1.54
LOC108980790	0.26	0.61	0.72	0.43	3.41	0.04	0.36	0.98	1.21	0.14	0.26	1.55	0	0.45	0.27	0.26	0.45	0.04
LOC108980791	24.21	31.31	28.78	27.44	23.44	19.54	24.49	27.45	20.78	25.03	28.28	23.12	34.52	26.06	23.82	23.1	20.38	26.11
LOC108980792	17.69	24.18	20.62	13.45	19.85	16.79	32.44	28.26	24.05	24.54	19.89	25.11	44.87	36.19	31.36	32.38	24.89	20.56
LOC108980793	22.38	25.34	23.47	39.42	22.89	33.71	53.15	31.75	40.45	51.29	37.68	27.46	49.7	44.78	49.07	38.35	58.1	46.11
LOC108980794	13.21	9.26	11.9	14.79	12.88	14.1	6.04	15.06	6.6	6.5	8.21	8.62	13.76	9.43	9.79	12.55	8.06	14.25
LOC108980799	0.32	0.32	0.09	0.32	0.58	0.19	0.1	0.14	0.47	0.15	0.36	0.43	0.4	0.09	0	1.03	0.05	0.05
LOC108980800	51.67	104.87	59.89	43.54	40.22	57.43	78.25	119.1	72.5	65.34	49.5	68.89	134.79	108.67	62.84	80.07	50.26	65.15
LOC108980803	22.6	10.23	16.87	18.28	8.94	8.72	4.24	11.01	9.18	14.51	18.6	20.67	15.7	9.43	7.67	6.6	11.97	10.57
LOC108980805	1.03	0.88	0.75	1.67	1.98	1.34	1.38	0.59	1.08	1.32	1.16	0.66	0.47	0.26	0.71	0.84	1.49	1.35
LOC108980806	42.04	34.49	43.45	50.86	46.98	49.57	40.53	42.79	43.5	46.73	57.88	43.49	37.3	32.36	56.33	56.75	36.71	45.39
LOC108980807	5.57	6.77	5.95	24.57	23.97	16.23	16.81	9.49	12.19	8.43	8.41	8.9	5.2	8.07	14.63	8.18	14.61	9.69
LOC108980808	9.07	11.47	8.78	11.92	15.63	11.94	12.59	11.33	7.33	9.37	10.05	10.79	8.75	9.02	9.88	8.19	5.84	8.01
LOC108980809	29.38	38.14	31.4	34.8	30.38	26.91	40.77	42.77	49.1	42.06	38.29	33.91	46.18	39.13	43.16	41.63	45.09	49.55
LOC108980810	2.27	2.26	2.09	2.06	1.76	2.54	2.46	3.46	1.73	2.79	1.36	2.08	2.3	3.58	1.29	0.72	1.92	1.71
LOC108980812	0.61	2.03	2.79	1.51	21.23	0.97	0.89	4.6	4.78	0.55	1.43	7.18	0.19	2.42	1.79	2.76	1.1	0.47
LOC108980816	11.04	10.34	11.73	13.93	15.73	12.82	9.55	9.37	7.73	7.82	7.38	9.15	8.92	8.42	9.99	5.95	8.67	9.07
LOC108980817	0.52	0.67	0.56	0.5	0.48	0.5	0.77	1.15	0.41	0.65	1.05	1.07	0.8	0.89	0.52	0.62	0.6	0.42
LOC108980819	7.1	8.78	11.13	4.17	3.8	5.12	2.71	7.37	4.26	8.78	7.39	7.83	5.77	8.3	2.01	5.1	2.52	4.35
LOC108980820	8.67	7.99	8.62	9.44	8.51	8.75	10.09	8.28	8.3	9.71	9.81	8.82	6.91	8.1	8.33	7.81	8.47	7.11
LOC108980821	33.3	39.04	32.75	39.88	45.9	42.96	51.43	34.57	36.67	29.37	32.78	38.5	69.56	41.54	48.85	29.64	49.1	43.47
LOC108980822	0.05	0.13	0.05	0.08	0.21	0.28	0.34	0.05	0.42	0.19	0.12	0.28	0.22	0.48	0.29	0.07	0.5	0.52
LOC108980823	0	0	0.03	0	0	0.07	0.58	0.07	0.2	0.04	0.03	0	0.06	0.06	0.17	0	0.07	0.07
LOC108980824	30.9	45.22	42.76	66.74	50.88	75.68	108.07	60.79	115.9	92.1	91	93.74	37.88	74.46	93.37	94.49	88.58	81.55
LOC108980825	28.44	28.91	24.44	77.38	79.27	66.54	61.45	36.35	53.16	35.75	43.4	41.84	41.48	43.74	59.04	36.8	44.37	40.38
LOC108980826	0	0	0	0	0	0	0	0	0	0	0	0	0.05	0.03	0	0	0	0
LOC108980829	6.08	8.46	8.56	9.05	8.76	8.3	8.99	7.65	5.59	6.67	8.49	7.84	8.24	8.33	9.18	7.5	6.72	8.19
LOC108980836	15	13.5	16.66	26.24	24.47	27.52	9.37	22.27	12.44	20.51	12.57	21.49	19.57	21.19	14.51	9.11	9.56	9.62
LOC108980837	5.45	6.48	5.5	3.7	5.01	3.85	9.28	7.36	5.75	6.56	6.2	4.87	6.94	5.23	9.69	7.64	7.65	7.68
LOC108980838	11.05	14.23	11.43	8.24	9.53	7.39	8.59	13.35	8.78	8.59	9.32	11.18	8.88	12.96	8.36	8.22	8.09	8.11
LOC108980839	24.85	19.36	23.86	31.52	32.7	29.25	15.43	18.88	16.85	16.97	17.21	19.51	13.91	17.89	20.07	17.55	16.35	15.16
LOC108980840	9.68	8.48	9.09	9.71	13.34	9.61	7.67	8.7	7.5	8.98	10.05	9.47	5.47	6.66	10.19	7.18	7.02	7.15
LOC108980842	0	0	0	0.05	0	0	0	0	0	0	0	0	0.14	0	0	0	0	0
LOC108980843	4.29	3.72	3.97	3.62	8.73	5.77	3.01	4.28	2.78	4.76	3.09	3.52	3.19	3.4	3.55	2.33	3.53	2.52
LOC108980844	2.17	2.44	1.81	1.2	1.7	0.23	8.25	1.39	3.76	6.61	2.25	3.16	2.18	2.91	5.03	2.25	6.72	2.79
LOC108980845	7.64	8.8	9.26	4.62	3.03	5.61	2.76	6.63	3.07	5.16	5.23	3.91	7.25	5.96	1.89	4.55	4.93	5.94
LOC108980846	49.63	35.2	48.56	54.62	56.94	55.17	24.88	19.6	26.13	31.67	39.26	34.95	22.17	28.08	21.56	30.56	47.97	48.75
LOC108980848	6.05	6.91	5.88	9.05	8.39	9.06	11.12	6.34	5.29	6.39	5.98	9.07	7.5	7.6	8.18	3.98	9.28	6.95
LOC108980849	2	2.63	2.07	2.5	2.21	2	4	1.93	3.02	3.73	2.71	3.81	1.79	1.56	3.05	2.41	2.4	2.21
LOC108980851	32.09	21.98	29.65	23.35	24.61	18.04	11.02	15.92	14.76	17.6	19.78	17.71	18.09	18.91	12.97	20.02	18.78	20.78
LOC108980852	3.05	4.78	5.21	2.64	3.22	3.8	5.78	8.4	3.77	4.54	3.83	4.89	10.52	12.99	4.08	4.82	2.38	2.2
LOC108980862	9.43	10.55	10.44	13.7	11.33	6.4	1.91	8.35	3.93	10.99	16.29	10.84	10.29	8.19	2.23	4.3	1.94	4.69
LOC108980863	112.61	41.16	80.04	98.14	80.62	74.89	34.6	31.51	32.72	32.58	35.25	42.6	44.3	33.61	22.21	90.71	64.57	83.27
LOC108980866	9.51	9.32	7.67	7.7	10.69	5.76	1.32	1.59	1.15	1.2	1.31	0.96	1.95	1.18	0.75	0.73	1.09	1.53
LOC108980868	8.06	8.26	9.92	7.15	3.41	7.32	3.47	7.02	3.88	4.62	4.48	6.07	5.96	4.94	2.44	4.23	4	2.98
LOC108980869	12.99	16.71	17.73	11.91	64.82	75.99	57.49	34.67	57.75	22.21	9.74	26.85	17.43	28.94	75.3	72.45	37.43	49.2
LOC108980870	13.3	12.98	12.8	9.65	5.84	15.5	25.48	12.84	18.65	17.27	17.18	13.97	15.18	15.99	15.92	17.6	20.94	25.55
LOC108980871	5.11	2.99	3.81	1.72	3.47	3.9	1.27	3.69	1.34	2.3	2.26	2.98	3.15	2.85	0.86	1.45	1.79	2.21
LOC108980875	11.24	9.86	11.39	13.41	11.97	11.48	8.68	11.11	10.1	11.75	12.23	11.8	7.54	9.68	9.1	10.36	10.46	9.32
LOC108980876	0.25	0.06	0.28	1.49	4.03	1.32	0.13	0.68	0.32	0.54	0.28	1.02	0.07	0.57	1.11	0.16	0.39	0.53
LOC108980877	0.17	0.33	1.25	4.13	20.03	6.6	48.35	1.9	10.41	4.59	5.38	1.7	0.43	1.16	13.06	18.85	7.46	10.79
LOC108980878	3.33	3.74	3.77	2.99	2.46	5.04	2.37	2.73	1.43	4.75	5.33	4.32	3.51	3.35	1.73	2.33	2.42	2.8
LOC108980880	0	0	0	0	0.05	0	0.05	0	0.05	0	0	0	0	0	0	0.3	0	0
LOC108980881	15.68	21.67	23.46	19.3	16.31	15.41	18.77	20.96	15.65	17.05	17.98	17.62	15.76	17.9	15.22	19.4	19.21	20.19
LOC108980883	3.27	2.83	3.56	3.36	3.73	5.11	3.88	3.65	4.04	4.13	3.3	3.92	4.45	4.65	3.54	3	3.2	3.5
LOC108980884	1.9	2.46	2.16	2.54	2.73	1.3	0.82	2.61	2.81	4.34	3.48	4.68	2.24	3.22	1.87	1.09	2.02	1.88
LOC108980886	28.98	35.19	28.49	35.96	45.9	31.49	42.51	35.96	35.47	21.89	22.11	28.8	31.23	29.92	45.85	31.46	31.41	30.36
LOC108980890	12.43	12.34	12.48	15.39	14.34	10.26	29.53	14.18	20.18	26.62	17.28	15.77	12.32	14.2	26.53	16.4	30.87	22.72
LOC108980891	9.58	6.98	8.63	7.74	8.3	8.02	4.71	6.47	4.84	7.52	8.57	7.43	5.86	7.69	5.37	5.05	6.32	6.26
LOC108980892	17.27	17.06	16.92	24.97	23.14	24.42	14.68	21	15.37	16.2	19.27	16.9	14.59	19.22	18.27	15.11	12.89	14.45
LOC108980893	19.39	18.68	21.87	25.93	22.53	17.49	18.23	18.5	18.98	20.54	20.73	17.82	17.63	17.04	18.55	18.36	19.32	15.59
LOC108980895	1.92	1.91	2.17	2.35	1.71	2.32	2.37	2.76	2.36	3.64	3.81	2.75	1.74	1.92	3.85	2.23	4.34	3.66
LOC108980896	12.09	12.53	11.75	7.47	9.98	2.68	1.18	7.72	4.54	6.12	5.88	8.48	10.5	8.6	2.72	2.82	2.47	2.25
LOC108980897	1.69	2.63	2.54	4.14	1.63	2.48	1.76	4.57	2.37	2.87	2.41	5.33	1.62	4.93	2.88	1.05	2.24	0.63
LOC108980898	0.03	0.02	0	0	0.07	0.14	0.34	0.08	0.05	0.09	0.02	0.03	0.13	0.07	0.26	0.05	0.16	0.05
LOC108980899	34.97	21.33	29.39	27.32	17.18	22.75	14.98	23.74	18.4	34.19	37.24	29.41	22.1	24.62	14.98	13.32	24.53	23.34
LOC108980900	6.35	5.53	6.59	6.29	5.93	6.43	3.27	7.25	3.96	6.84	7.59	8.53	3.53	5.65	3.43	3.32	5.14	3.94
LOC108980901	31.48	24.06	32.28	40.13	32.52	30.84	23.2	29.2	26.47	32.27	37.92	33	29.6	27.78	23.91	28.03	28.91	30.73
LOC108980902	21.62	22.96	23.38	24.26	27.69	28.35	17.06	20.07	17.3	19.12	19.35	21.34	22.47	23.97	18.37	18.31	17.5	17.81
LOC108980903	14.93	14.07	16.97	17.35	17.63	13	9.28	12.31	7.34	12.16	11.81	14.86	10.79	13.09	11.63	10.59	10.97	10.64
LOC108980904	9.75	11.14	10.44	12.54	13.14	9.97	15.69	11.76	15.01	14.48	15.26	12.87	8.84	9.54	16.08	13.22	15.3	16.02
LOC108980906	65.95	40.98	53.11	27.03	13.11	19.65	45.77	15.49	5.41	14.32	1.3	33.43	19.75	28.48	26.93	11.86	136.77	140.05
LOC108980908	52.55	38.66	59.73	58.67	72.57	91.31	48.62	70.48	66.78	52.74	62.55	59.04	83.35	64.69	66.66	77.15	60.46	69.36
LOC108980909	0.39	0.18	0.37	0.77	1.33	0.42	0.66	0.61	0.4	0.77	0.45	0.76	0.34	0.5	0.88	0.51	0.44	0.32
LOC108980913	4.78	5.06	5.2	6.48	7.85	6.34	5	5.96	5.08	4.97	5.57	5.65	3.48	4.97	5.96	4.52	5.16	4.78
LOC108980914	3.17	7.14	3.03	26.26	26.76	24.2	20.82	10.47	13.92	11.34	8.21	12.61	8.95	13.35	19	17.54	14.44	14.18
LOC108980917	14.58	16.68	15.67	14.17	16.36	17.89	19.3	19.81	17.44	13.62	8.94	12.32	13.01	16.41	23.13	21.43	15.72	16.21
LOC108980918	0	0	0	0	0	0	0	0	0	0.03	0	0	0	0	0	0	0	0
LOC108980919	3.54	8.39	8.56	5.09	5.56	9.68	44.65	14.3	47.14	7.67	8.76	13.87	7.37	22.44	37.87	61.42	24.14	39.32
LOC108980925	6.43	3.35	6.72	7.48	7.48	11.36	3.52	7.42	3.92	12.06	9.71	8.89	10.11	8.19	4.41	2.94	4.91	5.57
LOC108980929	118.67	85.84	94.24	101.64	72.47	78.42	23.48	108.48	60.56	99.69	99.23	124.87	176.04	94.25	40.21	69.62	66.69	90.79
LOC108980931	0.16	0.16	0.29	0.37	0.54	0.23	0	0.28	0.05	0.15	0.32	0.35	0.35	0.13	0.24	0.18	0	0.02
LOC108980934	9.68	4.04	9.68	28.5	30.57	31.63	48.51	32.02	36.32	30.95	26.39	25.79	15.79	20.18	37.75	32.23	27.01	29.57
LOC108980936	57.97	64.16	47.98	42.11	33.52	48.41	123.12	43.52	94.59	56.83	35.07	39.34	34.78	46.61	92.12	43.9	58.96	57.79
LOC108980937	28.51	23.34	26.51	35.83	20.95	23.89	15.43	19.77	16.75	23.74	24.49	23.72	21.98	20.86	17.62	21.34	15.86	16.69
LOC108980938	17.7	18.46	19.11	25.46	26.04	20.34	19.88	20.62	20.3	18.12	15.24	15.69	14.2	13.91	21.84	19.02	20.47	19.03
LOC108980940	63.62	82.4	66.86	134.16	106.99	144.57	209.44	117.21	266.89	213.07	245.72	104.13	129.83	212.65	188.28	338.67	172.4	221.65
LOC108980942	40.66	32.58	42.02	18.46	14.18	44.3	31.67	18.17	35.18	13.85	20.72	13.23	11.7	12.71	27.78	123.66	20.86	24.72
LOC108980943	0.26	0.26	0.06	0.1	0.03	0.33	0.44	0.13	0.27	0.14	0.51	0.18	0.68	0.24	0.14	0.25	0.3	0.17
LOC108980944	2.49	3.61	2.51	1.67	2.13	1.93	3.2	4.17	2.68	2.94	2.74	2.97	2.23	3.21	2.89	1.87	2.6	2.04
LOC108980946	15.45	18.77	18.02	15.2	11.6	10.79	10.93	15.84	12.38	11.78	8.93	10.06	16.94	13.19	12	16.99	10.59	8.37
LOC108980947	0	0.04	0	0	0	0	0	0.15	0	0	0.04	0	0	0.11	0	0.07	0	0
LOC108980948	0	0	0	0	0	0	0.05	0	0	0	0	0	0	0	0	0	0	0
LOC108980949	18.81	12.6	16.19	8.28	6.77	6.79	1.89	18.85	3.49	12.89	24.41	13.38	36.07	19.13	3.48	10.27	4.27	17.54
LOC108980950	6.56	5.43	6.64	7.29	8.23	8.52	8.21	6.59	8.24	5.5	6.3	7	7.73	7.93	10.12	8.97	4.88	7.75
LOC108980952	2.55	3.53	2.82	4.89	7.1	0.15	2.19	4.31	1.39	0.27	2.8	1.64	7.43	2.36	6.05	1.86	6.67	9.02
LOC108980953	0	0	0	0	0	0	0	0	0	0	0	0	0.2	0	0	0	0.07	0.07
LOC108980954	1.74	1.08	1.41	6.59	4.69	4.4	5.81	4.65	5.62	2.72	1.87	2.44	3.31	2.97	5.57	5.32	7.07	3.22
LOC108980955	208.77	201.32	219.62	149.87	121.96	145.33	115.51	245.44	141.4	199.04	171.1	241.32	363.54	296.32	125.5	149.69	158.31	163.76
LOC108980956	0.3	1.07	0.44	0.35	0.91	0.97	0.21	0.83	0.68	1.34	0.25	0.14	2.04	0.05	3.33	0.2	4.81	0.57
LOC108980957	4.53	5.27	5.05	5.5	5.95	6.2	3.95	7.03	3.91	3.55	4.54	4.15	7.81	3.35	5.02	6.18	3.07	3.51
LOC108980959	0.33	0.13	0.31	0.17	0.44	0.21	0.52	0.5	0.37	0.56	0.45	0.66	0.35	0.16	0.41	0.33	0.47	0.33
LOC108980960	0	0.09	0	0.04	0	0.05	0.05	0.05	0	0.59	0.04	0	0.34	0.13	0.56	0.44	0.88	0.92
LOC108980961	0.28	0.15	0.48	0.09	0.16	0.14	0.17	0.38	0.11	0.11	0.25	0.12	0.12	0.09	0.09	0.2	0.15	0.13
LOC108980962	7.86	5.35	7.73	10.06	5.79	14.46	3.72	4.5	2.49	5.42	3.66	7	2.85	4.02	2.77	3.59	4.5	4.22
LOC108980963	11.14	17.68	13.38	9.54	10.1	8.66	14.08	21.89	12.7	17.57	18.62	17.13	15.31	22.62	12.86	14.54	11.54	9.54
LOC108980966	0	0.07	0.1	0.14	0.32	0.03	0.11	0.07	0.11	0	0.03	0.03	0.16	0	0.21	0.2	0	0.07
LOC108980968	39.99	41.29	37.43	39.47	40.3	34.57	26.2	36.98	29.27	27.03	29.17	37	21.37	30.98	26.35	25.03	21.78	24.5
LOC108980969	2.08	3.44	1.54	3.12	3.05	2	4.01	2.42	2.24	6.13	2.73	7.53	2.88	1.81	3.1	0.39	5.1	3.32
LOC108980972	0	0	0.03	0	0	0	0	0	0	0.12	0	0	0	0	0.03	0	0	0
LOC108980973	0	0.03	0.03	0.13	0.1	0.23	0.13	0.13	0.1	0.32	0.67	0.21	0	0.09	0.34	0.03	0.1	0.2
LOC108980976	12.7	35.84	20.34	5.1	3.16	16.14	4.92	21.24	5.4	132.55	156.86	247.47	24.24	109.87	11.15	4.75	9.87	21.01
LOC108980977	0.71	0.97	0.5	0.58	0.75	1.42	0.94	0.72	1.39	1.41	0.5	0.84	1.35	0.54	1.07	0.75	1.2	0.92
LOC108980979	26.59	12.79	11.43	3.99	6.04	9.02	11.13	11.92	3.03	5.13	9.83	4.23	7.49	4.08	9.16	12.3	4.42	5.67
LOC108980980	0.11	0.03	0.03	0.03	0.09	0.03	0.15	0.03	0.03	0	0.03	0.03	0.27	0.03	0.12	0.22	0	0.09
LOC108980981	18.17	19.12	17.41	18.27	16.8	15.14	15.11	15.9	16.19	23.25	23.26	20.64	17.91	20.23	16.55	17.98	19.35	17.96
LOC108980983	0.22	0.33	0.05	0.28	0.47	0.33	0.46	0.28	1.19	0.49	0.16	0.31	0.16	0.47	2.19	1.24	0.92	0
LOC108980984	6.44	4.25	6.23	4.41	2.51	1.27	33.37	4.2	9.1	21.94	14.87	6.99	21.85	8.17	23.77	12.48	33.84	28.52
LOC108980985	1.2	1.11	1.31	2.19	2.22	0.5	0.83	1.8	1.03	5.49	1.47	13.13	0.67	0.57	6.67	1.08	3.07	2.68
LOC108980986	0	0	0	0	0	0	0.05	0	0	0.05	0	0	0.13	0	0.05	0	0.05	0.05
LOC108980988	16.92	12.67	16.08	14.04	9.3	20.94	5.81	14.47	8.28	12.62	10.52	21.62	15.45	16.36	6.84	5.91	10.31	8.12
LOC108980990	129.06	133.99	114.91	305.06	377.32	271.53	278.25	123.64	238.78	145.17	141.28	152	202.95	139.3	287.95	156.35	211.8	245.16
LOC108980991	0	0	0	0	0	0	0	0	0	0	0	0	0.06	0	0	0	0.33	0
LOC108980992	0.06	0.06	0.06	0.09	0.1	0.27	1	1.17	1.79	5.01	2.41	0.56	3.39	0.71	5.35	0.18	4.12	1.33
LOC108980993	0.02	0.5	0.38	0.05	0.11	0.29	0.17	0.22	0.11	0.27	0.14	0.13	0.12	0.22	0.02	0.05	0.07	0.04
LOC108980994	2.48	1.59	1.83	2.17	0.84	2.17	1.82	2.51	2.33	2.36	0.96	2.2	2.43	2.11	2.47	1.71	3.85	1.79
LOC108980997	12.49	9.69	10.66	10.79	8.14	11.3	8.64	10.98	8.15	12.67	12.93	14.1	15.39	12.98	8.92	9.66	10.32	11.41
LOC108981001	25.32	36.98	27.09	21.38	18.2	17.32	30.18	29.47	27.83	27.84	26.3	31.33	46.33	33.38	28.92	37.75	24.69	30
LOC108981003	2.85	3.81	2.9	18.94	30.2	19.34	17.32	4.06	10.87	8.09	4.43	4.15	9.18	7.14	20.12	6.49	15.2	11.87
LOC108981006	0	0	0	0	0	0	0.09	0	0	0	0	0	0	0	0	0	0.04	0
LOC108981007	13.42	13.01	17.94	12.53	19.43	16.9	37.11	14.84	19.64	28.06	15.45	19.84	10.79	11.91	29.57	7.37	41.87	38.97
LOC108981008	0.15	1.12	0.68	0.26	0.31	1.6	0.19	0.23	0.15	0.45	0.07	0.21	0	0.17	0.12	0.22	0.27	0.04
LOC108981009	1.2	0.76	0.95	0.89	0.47	1.7	2.5	0.59	0.32	0.59	0.65	2.25	1.15	1.3	0.37	0.35	0.51	1.14
LOC108981011	2.94	3.96	2.98	1.58	2.38	2.67	3.24	3.8	2.85	4.66	3	3.73	7.38	3.96	4.07	2.49	2.31	2.75
LOC108981012	0	0	0	0	0	0	0.58	0	0	0	0	0	0	0	0	0	0	0
LOC108981013	0	0	0	4.55	10.85	0.31	90.72	2.3	68.17	0.72	0.19	0.04	1.59	1.2	55.37	4.35	12.44	4.94
LOC108981014	1.36	0.62	0.9	1.43	2.14	2.5	9.73	1.13	5.99	3.51	4.15	1.62	1.61	1.13	7.73	3.98	5.77	5.34
LOC108981015	0	0	0	0.07	0.01	0.03	0.04	0	0.01	0.01	0.07	0.05	0.01	0.04	0.05	0.04	0.12	0.08
LOC108981017	11.77	12.23	11.4	9.29	10.54	11.84	5.88	8.28	6.18	8.44	7.94	12.36	8.07	9.08	6.76	6.07	5.73	5.45
LOC108981018	13.63	12.97	13.19	25.78	22.62	18.21	22.12	16.37	13.77	15.29	18.02	16.92	18.86	15.7	17.88	15.51	16.91	15.05
LOC108981020	12.37	15.67	12.4	11.03	12.59	10.71	8.03	8.21	6.94	6.72	10.15	7.54	4.43	6.41	6.82	8.81	5.26	6.24
LOC108981022	170.96	103.39	168.62	81.39	72.81	78.41	54.12	79.18	53.91	81.91	88.74	180.09	54.55	64.19	102.07	94.81	76.61	91.78
LOC108981023	52.38	52.16	53.8	23.74	24.06	25.3	26.77	59.73	31.77	54.15	48.75	62.47	90.81	62.78	32.74	33.53	24.36	38.44
LOC108981024	42.12	60.29	45.91	24.44	22.06	15.89	23.24	26.52	23.5	24.58	22.14	39.25	24.28	29.18	23.3	19.4	19.82	19.45
LOC108981025	103.76	120.27	115.69	147.53	155.14	124.49	249.82	155.8	294.75	265.08	209.59	253.96	253.21	246.16	269.57	226.82	227.57	205.09
LOC108981026	27.12	80.6	27.88	53.37	68.41	52.08	73.76	47.43	82.5	27.34	26.16	34.38	55.07	52.4	83.44	71.64	61.63	70.05
LOC108981029	0	0	0	0	0	0	0.05	0	0	0	0.09	0.06	0	0	0.29	0	0.05	0.02
LOC108981030	1.51	0.19	1.34	0.27	0.27	0.02	0.27	1.35	0	0.35	0.21	0.44	0.53	1.8	0.02	0	0.37	0.15
LOC108981031	5.65	1.7	4.18	1.09	2.76	1.11	0.61	2.94	0.65	3.7	1.24	1.82	2.3	3.14	0.48	0.45	0.75	0.69
LOC108981034	3.56	1.79	2.12	2.42	5.57	2.45	1.52	1.99	2.25	2.04	1.59	2.66	2.33	2.82	2.45	2.22	2.36	2.92
LOC108981036	0.6	0.77	1	0.53	0.21	0.4	3.15	0.85	1.44	1.35	1.37	0.81	0.54	0.47	0.83	1.01	1.52	0.96
LOC108981038	14.67	16.99	15.39	19.51	14.44	14	25.29	16.12	20.44	13.97	14.27	10.71	15.54	13.68	20.42	16.06	17.9	17.23
LOC108981039	16.08	12.79	12.34	13.79	12.55	11.52	9.99	13.62	9.38	13.94	14.47	15.49	19.79	15.19	10.25	11.3	13.78	12.71
LOC108981040	1.61	2.84	2.58	1.65	2.47	3.13	2.43	4.09	1.74	2.65	2.72	3.51	2.47	3.11	2.01	3.31	2.64	1.86
LOC108981042	3.99	3.94	9.59	12.62	23.5	24.37	14.43	12.22	20.92	15.59	4.78	3.99	3.15	2.96	29.32	4.5	14.49	6.61
LOC108981043	5.62	6.36	4.9	2.1	3.58	0.77	0.33	3.73	1.51	0.63	1.62	4.78	4.95	2.41	2.13	1.93	2.65	1.84
LOC108981044	465.78	480.73	446.78	455.73	383.64	336.36	575.81	431.13	595.53	564.72	505.59	479.6	465.34	450.98	468.01	355.94	563.29	543.81
LOC108981046	0.37	0.67	0.5	1.92	8.29	1.53	12.67	0.95	6.2	2.76	1.05	0.73	1.59	0.59	9.21	3.76	5.08	4.76
LOC108981048	90.33	61.53	85.87	84	35.97	77.64	59.21	78.22	54.42	137.15	175.13	124.4	41.62	57.17	28.14	57.44	90.95	85.9
LOC108981049	0	0	0.03	0	0	0	0	0	0	0	0	0	0	0	0	0.05	0	0
LOC108981050	13.06	15.06	12.73	13.43	12.72	11.89	9.09	12.29	7.74	10.27	8.44	11.69	9.95	14.46	10.13	10.47	7.49	7.39
LOC108981051	6.93	6.64	7.08	11.43	11.47	11.7	10.34	7.72	8.25	10.62	11.64	11.25	6.64	6	10.36	7.33	10.3	8.07
LOC108981052	184.12	140.13	174.06	126.26	108.53	126.16	64.27	132.58	72.88	107.98	121.42	157.27	211.02	204.86	70.73	86.2	71.52	100.06
LOC108981053	12.67	9.75	11.89	13.52	19.57	16.53	13.82	19.52	20.25	16.46	16.37	19.43	18.61	19.6	27.68	18	19.69	12.63
LOC108981054	182.94	173.95	197.08	236.57	277.36	198.11	301.53	326.89	435.84	285.15	297.48	226.49	499.2	345.96	481.16	486.84	311	370.82
LOC108981058	29.34	28.67	31.68	26.76	32.43	34.83	31.41	32.44	32.3	32.17	30.89	28.86	37.47	27.93	29.49	47.71	27.11	36.83
LOC108981060	69.55	44.51	71.39	29.77	22.65	29.16	24.5	42.98	24.98	40.29	46.41	41.7	61.23	42.52	22.22	51.01	25.83	38.94
LOC108981062	0.27	0.48	0.27	0.14	0.22	0.21	0.14	0.28	0	0.08	0.27	0.13	0.33	0.26	0.07	0.07	0.36	0.21
LOC108981063	91.27	61.02	115.11	104.77	54.39	118.87	8.65	21.05	30.01	33.31	21.34	57.07	35.21	21.6	14.03	47.72	34.48	44.43
LOC108981067	68.19	82.71	69.24	96.35	84.33	90.36	104.51	102.28	122.74	86.81	81.59	74.29	88.06	87.63	101.63	78.94	107.79	94.51
LOC108981069	0.27	0	0.53	0.27	69.9	2.45	15.63	0.69	1.67	0.45	0.53	0.38	0.13	1.02	12.25	16.78	1.12	0.28
LOC108981071	47.12	55.01	51.65	37.68	35.58	37.95	51.81	62.59	49.99	56.98	47.12	40.43	91.7	57.54	40.04	47.75	42.41	56.86
LOC108981072	0.63	0.41	0.39	0.17	0.37	0.06	0.48	0.24	0.3	0.57	0.17	0.22	0.33	0.11	0.18	0.79	0.36	0.3
LOC108981073	0.04	0	0	0.11	0	0	0.04	0	0.04	0	0.03	0	0	0	0.11	0	0.04	0.07
LOC108981076	5.35	7.05	4.25	3.38	2.68	4.23	0.64	2.13	1.01	3.93	3.86	4.87	4.22	5.05	1.08	0.36	3.47	4.63
LOC108981078	7.31	5.96	6.68	5.17	2.92	10.12	1.11	5.99	1.29	4.03	3.85	4.13	7.21	6.69	1.57	1.8	4.93	4.27
LOC108981079	0	0	0.04	0	0	0	0	0	0	0	0	0	0	0	0	0	0	0
LOC108981080	0	0	0	0.04	0.05	0	0	0.32	0.23	0.1	0.4	0.04	0.26	0	0.09	0.31	0.47	0.42
LOC108981083	29.61	13.24	24.37	22.68	15.06	30.64	11.31	15.47	11.23	18	17.62	15.45	15.16	17.12	8.07	12.41	8.98	11.51
LOC108981084	132.67	122.09	122.34	32.6	16.42	23.29	31.98	41.58	34.76	78.86	26.65	112.4	49.29	54.77	20.16	63.57	64.57	41.68
LOC108981085	252.01	219.96	252.88	247.71	287.48	270.86	321.54	278.87	312.97	255.95	240.76	296.14	485.76	377.33	280	198.3	207.34	362.27
LOC108981086	18.47	18.89	19.19	22.23	18.36	25.42	17.65	18.64	15.31	19.15	22.46	23.88	17.58	20.48	14.42	10.15	15	13.71
LOC108981087	0	0	0	0.04	0.04	0.16	3.82	0	0.63	0.69	0.94	0	0	0.02	0.84	0.61	0.82	2.02
LOC108981088	0.32	0.19	0.25	0.32	0.74	2.3	0.2	0.32	0.46	2.29	0.43	0.77	0.12	0.12	0.13	0.06	0.33	1.63
LOC108981090	5.09	3.74	5.69	6.61	5.91	6.47	5.88	3.86	3.62	7.3	4.23	4.86	5.42	3.16	5.27	4.48	5.11	4.02
LOC108981094	48.87	44.88	50.14	34.79	61.18	82.2	25.07	23	27.14	79.65	63.14	60.07	219.75	124.12	33.58	41.9	16.22	39.21
LOC108981095	9.13	11.66	11.25	5.69	2.59	11.85	1.96	6.54	1.52	7.81	3.58	6.79	6.65	8.32	0.24	2.26	1.54	1.45
LOC108981096	5.64	7.13	5.33	6.13	17.39	16.55	10.55	13.38	14.19	10.54	6.08	6.68	7.26	9.86	14.34	10.63	8.24	5.15
LOC108981098	3.37	4.67	3.25	4.36	4.6	4.26	8.45	6.4	7.36	6.63	6.65	5.17	6.77	5.59	8.02	5.29	8.76	7.7
LOC108981100	59.43	59.83	56.11	149.11	266.18	162.26	118.79	69.04	154.31	70.57	84.69	51.49	59.61	60.79	158.97	199.39	127.11	101.67
LOC108981101	1.61	2.06	2.18	3.38	3.64	3.4	7.17	3.03	4.37	3.73	4.02	3.46	2.24	3.16	7	3.41	4.53	4.3
LOC108981102	0.33	0.2	0.12	0.22	0.19	0.22	2.07	0.52	1.18	1.34	1.41	0.63	0.73	1.03	0.84	0.41	2.18	2.12
LOC108981103	36.56	46.51	37.05	116.03	161.25	93.46	171.59	48.31	106.5	56.03	57.38	54.6	90.64	63.06	134.55	59.05	126.01	120.64
LOC108981104	0.1	0	0	0	0	0.05	0	0	0	0	0	0	0	0	0	0	0	0
LOC108981105	65.76	65.24	64.94	61.22	50.02	47.45	50.13	58.45	52.38	51.59	54.75	57.77	71.86	57.79	47.19	53.56	56.49	61.45
LOC108981106	0	0.12	0.23	0.3	0.06	0	0.13	0	0	0.07	0.12	0.68	0.06	0	0.13	0.06	0	0.12
LOC108981107	163.69	86.88	190.59	171.63	177.27	238.24	75.25	105.24	112.83	172.01	79.82	155.41	147.68	70.57	135.14	109.27	136.11	131.99
LOC108981109	0.64	0.53	1.11	0.66	1.05	1.88	0.24	0.79	0.35	1.26	0.18	1.43	0.13	0.8	0.04	0.2	0.16	0.1
LOC108981110	0	0	0	0	0.5	0.16	0.08	0.12	0	0.04	0	0	0.23	0.26	0.25	0.27	0.04	0
LOC108981111	0.4	0.34	0.18	0.09	0.26	0.19	0.19	0.06	0.06	0.34	0.27	0.47	0.51	0.23	0.61	0.49	0.06	0.06
LOC108981112	0	0.16	0.15	0.16	0.33	0.16	0.16	0	0	0.87	0	0.59	0.91	0.75	0.49	0.77	0.82	0.33
LOC108981113	2.78	4.5	6.51	9.04	13.79	10.95	24.17	14.72	15.53	8.66	8.04	7.56	9.25	12.07	25.65	30.62	9.24	12.48
LOC108981114	60.52	65.21	55.83	54.22	45.75	29.27	27.38	61.47	35.98	79.99	54.05	64.91	68.72	69.24	38.39	24.51	34	20.12
LOC108981115	0.91	1.91	1.18	2.08	1	1.34	2.56	1.86	0.9	1.91	1.3	1.28	2.21	1.71	1.78	0.81	3.07	7.83
LOC108981116	18.06	18.16	18.02	35.05	63.8	32.41	81.46	20.25	78.44	34.69	29.93	18.45	22.32	19.46	70.88	51.12	49.06	41.15
LOC108981117	8.02	10.49	10.56	8.94	7.03	11.11	13.19	16.99	14.99	20.31	23.78	17.81	19.1	17.58	20.2	19.37	28.39	14.45
LOC108981119	113.14	94.94	119.4	67.82	95.11	125.51	105.41	128.65	82.72	94.19	89.48	131.65	140.33	149.06	131.87	153.13	72.03	110.5
LOC108981121	16.09	7.63	12.75	4.24	3.59	6.33	0.3	0.67	0.59	1.11	0.14	0.34	1.93	1.43	0	0.56	0.83	1.34
LOC108981125	0.45	0.86	0.88	0.89	20.44	1.3	1.24	2.98	0.29	2.26	5.48	5.29	0.96	6.27	1.3	0.82	0.31	0.86
LOC108981127	18.67	18.12	26.06	7.88	7.44	10.25	3.61	10.84	5.54	12.23	8.96	28.46	11.1	13.41	6	2.02	4.93	3.91
LOC108981128	6.62	5.14	5.1	8.14	10.24	11.37	7.63	6.35	5.51	6.11	3.38	6.7	9	7.47	8.69	8.09	5.71	6.63
LOC108981130	30.51	15.61	6.99	7.06	10.07	0.74	63.94	23.28	7.79	6.83	15.06	33.05	13.56	3.57	48.83	4.89	48.35	4.52
LOC108981132	5.34	3.81	4.82	4.91	5.06	4.24	3.26	4.35	3.76	7.14	6.81	5.23	3.72	4.17	4.11	2.49	4.02	3.8
LOC108981133	0.19	0.88	1.13	0.48	2.05	0.88	0.71	0.79	1	0.32	0.38	1.27	1.3	1.55	0.5	0.66	0.6	0.4
LOC108981134	116.23	110.38	109.25	90.76	88.91	91.39	89.05	101.73	82.92	115.02	88.6	106.39	201.06	137.15	75.37	58.34	92.99	86.58
LOC108981135	0.26	0.69	0.54	0.56	4.62	0.95	4.11	1.1	1.59	3.86	1.13	1.33	2.34	1.17	8.4	4.4	13.11	20.11
LOC108981136	12.61	14.53	14.24	17.2	21.47	13.21	18	13.69	14.4	18.64	17.18	16.81	15.14	15.1	20.17	14.38	19.33	15.31
LOC108981137	2.59	3.08	1.5	0.92	0.63	1.13	4.69	3.17	1.52	9.12	2.7	7.69	7.48	7.24	2.46	3.53	7.24	6.52
LOC108981138	0.02	0	0.06	0	0.03	0	0.1	0.25	0.13	0.02	0.05	0.08	0	0.05	0.05	0.02	0.07	0
LOC108981140	41.41	23.29	34.05	14.4	10.45	16.77	5.06	12.14	4.13	4.88	2.39	4.76	9.51	6.13	3.45	12.73	11.66	13.1
LOC108981141	15.63	14.36	16.7	15.43	13.96	13.35	19.18	18.99	17.07	19.5	15.42	12.33	18.83	13.34	17.04	18.26	21.52	18.4
LOC108981143	6.56	4.09	5.97	4.96	6.42	4.82	6.32	6.54	7.66	9.04	6.21	10.88	5.7	6.87	10.32	6.23	8.84	7.81
LOC108981145	2.71	2.93	3.09	2.23	2.44	2.21	1.33	2.23	1.81	1.62	2.26	2.48	1.62	2.98	1.27	2.75	1.46	1.43
LOC108981146	30.85	22.24	25.42	23.43	20.72	27.99	19.31	22.92	21.47	31.93	37.69	37.07	18.39	26.01	16.55	14.13	23.72	23.71
LOC108981147	12.56	10.9	12.68	11.12	11.65	12.7	9.58	13.22	9.78	16.8	15.2	14.39	16.13	14.37	8.79	11.49	9.54	14.24
LOC108981148	10.45	10.32	10.52	14.55	17.7	15.77	44.6	15.3	23.64	24.5	16.65	16.36	36.22	19.69	30.69	18.52	24.69	29.98
LOC108981149	3.88	4.77	3.81	3.87	5.79	3.84	3.08	4.06	4.19	3.21	3.08	3.12	3.47	4.78	4.28	1.84	2.54	1.75
LOC108981151	50.51	45.02	53.16	51.41	36.06	41.16	19.19	42.37	25.96	61.4	48.1	69.65	29.91	43.67	23.67	19.12	28.15	20.04
LOC108981152	48.61	37.51	48.12	49.01	46.63	30.44	37.03	50.42	44.52	41.66	29.92	28.18	45.77	34.62	31.48	27.41	44.4	43.02
LOC108981153	0.05	0.07	0.14	0.02	0.05	0.17	1.6	0.1	0.32	0.86	0.07	0.04	0.32	0.18	1.55	0.51	1.3	1.29
LOC108981154	0.29	0.35	0.4	1.34	0.96	0.38	3.86	1.68	1.32	2.75	1.54	1.01	1.76	1.4	4.56	0.77	3.58	3.93
LOC108981155	29.36	31.92	29.4	53.82	49.93	43.61	40.18	29.85	39.61	30.73	34.05	31.87	24.7	27.53	43.81	30.75	39.23	34.11
LOC108981159	0	0.07	0.11	0	0.04	0.15	0	0.52	0.19	0.04	0.21	0.17	0.14	0.14	0.08	0	0	0
LOC108981160	0	0	0	0	0.15	0	1.36	0.15	0.22	0.64	0	0.07	0.83	0.14	0.91	0.14	0.83	0.97
LOC108981163	0	0	0.13	0.04	0.16	0	0.07	0	0	0.02	0	0	0	0	0.04	0	0	0
LOC108981165	10.34	8.9	8.86	11.06	8.78	6.67	8.85	9.87	10.49	6.71	6.23	6.7	7.17	7.42	5.32	5.33	7.37	6.32
LOC108981166	0.55	0.62	0.8	1.19	1.69	0.91	5.66	1.05	3.48	2.03	1.63	0.65	1.69	0.99	4.55	3.61	3.24	3
LOC108981167	4.21	7.8	3.99	13.3	12.32	7.82	11.6	7.79	11.09	7.49	7.99	5.24	9.14	6.24	14.54	7.73	8.22	8.71
LOC108981168	10.26	9.75	10.23	10.78	10.27	11.43	5.23	8.39	5.24	7.15	7.42	9.41	6.89	9.55	6.43	5.5	6.64	6.29
LOC108981170	0.72	0.84	0.45	0.41	0.76	1.19	3.3	5.76	14.59	19.93	8	4.57	15.08	6.93	32.72	3.46	30.95	9.38
LOC108981171	7.18	13.76	12.42	7.85	7.87	21.98	11.33	14.54	6.4	10.98	5.75	4.28	8.45	12.79	2.72	26.75	10.18	3.89
LOC108981172	12.51	18.1	13.47	19.7	19.59	15.52	24.32	15.2	19.4	13.29	15.8	15.2	19.57	14.65	20.59	24	24.24	27.22
LOC108981174	5.18	3.8	3.17	1.97	1.27	1.48	0.53	1.41	0.8	3.25	3.05	3.45	1.46	1.24	0.81	0.44	1	1.08
LOC108981175	53.56	40.95	50.4	50.73	44.06	45.78	32.97	35.15	34.46	35.49	44.58	45.3	21.8	34.28	31.6	39.03	37.1	33.41
LOC108981176	0.02	0.09	0.05	0.07	0.04	0.05	0	0.02	0	0.02	0.02	0.08	0.02	0.05	0	0	0	0
LOC108981177	0	0.02	0.1	0.06	0.25	0.02	0.05	0.05	0.01	0.03	0	0.17	0.11	0.18	0.06	0.06	0.01	0
LOC108981178	21.79	21.49	19.81	11.3	10.18	14.57	10.45	17.06	9.08	14.61	12.57	21.3	15.49	19.26	12.58	12.97	12.31	16.21
LOC108981179	0.44	0.49	0.48	4.77	9.73	5.32	5.83	1.21	5.43	4.98	3.29	3.49	2.28	4.09	11.06	3.79	3.09	2.85
LOC108981181	22.77	21.19	24.4	18.7	19.96	16.73	13.66	16.34	13.66	15.71	19.41	16.59	15.34	18.52	13.94	19.07	17.18	18.55
LOC108981184	5.25	7.07	5.47	3.37	2.66	2.05	5.05	10.17	5.88	6.78	10.22	7.63	11.09	11.75	3.83	5.15	3.47	5.07
LOC108981185	0.54	0.68	0.46	0.3	0.43	0.07	0.32	0.69	0.56	0.3	0.53	0.48	0.49	0.32	0.71	0.26	0.21	0.14
LOC108981186	29.73	36.56	31.9	28.67	32.08	26.85	38.26	40.2	41.49	44.09	41.74	41.55	31.62	39.77	38.9	26.67	42.36	39.15
LOC108981188	13.31	10.4	12.54	15.2	13.58	14.56	9.42	11.7	8.59	11.6	13.89	11.74	6.86	9.93	9.75	8.3	11.27	8.58
LOC108981189	7.51	9.98	10.82	15.77	24.37	12.9	28.77	11.51	18.25	6.95	8.83	6.41	8.41	11.38	19.67	14.57	6.97	8.67
LOC108981190	4.25	8.48	6.06	1.65	1.56	3.13	2.7	5.38	2.42	2.15	1.89	2.46	2.86	4.8	1.45	2.62	1.47	2.08
LOC108981191	1.72	2.06	1.93	2.09	1.65	2.44	3.02	4.3	2.27	4.37	4.42	2.52	3.5	2.38	3.14	5.57	3.24	3.27
LOC108981192	0.06	0.16	0.09	0.7	0.81	0.42	3.95	0.52	1.12	3.54	1.94	0.33	0.58	0.27	2.89	0.78	1.99	2.56
LOC108981193	1.83	1.9	3.93	2.14	3.6	9.29	2.33	8.38	5.25	1.03	0.61	0.84	2.32	4.08	2.15	1.92	2.54	1.41
LOC108981195	2.28	2.98	3.54	2.27	3.37	1.15	1.66	1.98	0.23	0.62	0.89	1.17	1.2	1.18	0.95	3.11	2.13	0.7
LOC108981196	12.17	12.82	13.23	7.86	8.64	8.85	3.24	9.99	4.39	6.12	7.85	10.55	4.74	10.43	4.07	4.25	4.36	4.84
LOC108981197	1.25	1.14	1.08	2.07	2.68	1.53	0.7	0.79	0.5	1.11	1.21	2.22	1.09	1.5	1.46	0.35	0.78	0.7
LOC108981198	0.08	0.21	0.04	0.16	0.09	0.08	1.12	0.25	0.38	1.36	0.52	0.15	0.32	0.12	0.86	0.2	1.2	0.93
LOC108981199	143.97	147.91	145.38	277.22	386.31	329.87	287.14	174.74	250.66	144.76	170.67	181.85	279.73	214.38	272.59	142.32	265.66	241.96
LOC108981200	21.52	21.28	24.01	16.99	16.19	13.67	12.33	21.73	13.42	15.67	17.66	17.16	11.15	17.2	13.44	15.85	14.03	12.9
LOC108981201	21.12	23.25	20.89	17.07	21.7	14.74	24.39	27.94	22.53	25.82	21.27	31.23	35.1	25.43	36.48	20.76	21.34	20.44
LOC108981202	15.95	12.01	14.74	9.83	12.54	6.51	4.57	10.62	5.32	11.66	14.5	10.62	8.34	9.7	4.44	5.33	6.69	5.18
LOC108981203	176.28	343.34	216.4	96.9	52.14	75.41	135.22	364.2	66.29	219.88	216.95	215.54	422.91	224.07	95.58	253.11	70.94	142.53
LOC108981205	3.81	8.55	2.97	2.26	1.45	0.83	0.67	7.08	1.04	1.86	1.94	1.85	13.29	9.15	1.65	0.67	2.66	2.63
LOC108981206	49.77	42.35	43.49	49.45	51.05	55.92	38.55	33.61	34.75	36.38	35.74	41.72	61.6	40.99	33.3	38.45	34.41	41.36
LOC108981207	25.83	28.17	23.33	29.25	32.37	25	24.56	28	25.74	26.9	25.62	27.65	45.15	32.01	25.94	26.38	26.52	24.37
LOC108981208	4.32	30.75	4.85	28.41	28.66	33.63	164.38	120.49	166.48	57.65	31.6	33.76	155.23	61.84	275.79	70.07	284.61	125.95
LOC108981211	0.11	0.2	0.2	0.27	0.09	0.11	0.12	0.76	0.21	0	0.24	0.27	0.58	0.19	0.05	0	0.02	0.05
LOC108981212	14.65	12.57	15.48	14.54	10.9	12.09	9.8	13.91	9.5	13.92	12.62	14.24	11.65	14.68	8.95	8.84	11.36	8.93
LOC108981213	0	0	0	0	0.04	0	0	0	0	0	0	0	0	0	0	0	0	0
LOC108981214	0.86	1.12	1.44	2.12	3.56	2.46	0.05	1.02	0.21	2.09	1.38	2.46	1.45	0.66	0.34	0.32	0.13	0.35
LOC108981215	10.3	17.14	17.72	75.2	83.16	118.68	35.26	17.86	44.28	5.65	10.14	5.38	12.26	7.35	119.8	17.65	62.75	21.71
LOC108981217	0.68	0.53	0.62	0.95	0.82	0.86	3.44	0.45	0.69	1.66	0.35	0.31	0.94	0.69	2.08	0.91	2.65	2.4
LOC108981220	26.61	29.71	51.15	15.43	16.73	60.35	29.95	60.14	30.88	28.45	16	36.35	35.07	51.3	42.59	72.63	65.72	39.82
LOC108981221	34.09	38.67	34.54	86.04	83.27	69.86	58.83	31.98	68.89	42.87	44.62	41.13	24.19	31.38	70.72	41.93	54.03	45.88
LOC108981222	45.51	48.06	85.35	15.17	26.68	124.14	58.12	95.11	54.46	48.75	25.73	59.1	54.76	93.81	73.15	127.86	54.74	41.72
LOC108981223	2.09	2.24	2.85	2.27	2.21	2.73	2.76	2.72	1.17	2.29	1.81	2.53	2.13	2.19	2.27	1.95	4.73	2.73
LOC108981224	0	0	0	0	0	0	0	0	0	0	0	0.04	0	0	0	0	0	0
LOC108981226	20.23	20.56	20.27	16.76	16.91	14.5	14.37	16.95	12.54	18.18	19.37	21.25	12.84	17.05	15.33	14.24	16.19	16.34
LOC108981227	22.2	52.3	25.19	11.88	23.35	5.49	9.74	17.52	9.69	11.08	3.63	11.96	16.11	14.31	15.59	21.3	21.34	4.95
LOC108981228	12.08	11.61	11.3	14.57	15.2	9.43	13.12	12.09	18.29	16.45	18.01	16.67	10.19	9.36	15.06	9.16	11.43	9.67
LOC108981229	56.7	50.33	51.2	65.35	61.23	77.1	30.6	35.91	35.2	41.17	48.05	59.77	43.51	45.32	32.85	41.94	42.05	38.92
LOC108981230	111.29	118.06	81.08	42.32	53.79	10.12	7.71	18.55	21.89	72.62	27.24	109.67	18.62	50.17	44.31	1.93	26.95	18.1
LOC108981231	3.97	5.29	4.7	6.27	9.72	4.76	12.03	4.41	9.2	10.04	8.43	8.03	8.99	6.16	9.96	7.81	8.22	5.83
LOC108981232	10.58	13.83	10.67	25.14	26.84	20.52	32.17	16.1	15.59	13.39	13.21	15.1	9.44	13.57	19.79	14.78	26.68	25.7
LOC108981233	30.3	47.02	21.11	2.22	4.76	0	0.94	1.02	3.36	3.53	12.47	35.9	0.18	0	5.43	0.14	3.59	2.92
LOC108981234	8.18	21.14	11.32	10.29	14.32	15.87	9.5	18.97	14.55	18.99	15.31	14.87	16.92	19.34	12.06	14.41	12.8	10.3
LOC108981236	11.96	17.8	14.89	17.76	13.63	18.07	19.48	17.47	22.21	18.11	17.59	21.32	22.44	19.6	20.19	19.9	13.5	19.19
LOC108981240	0	0	0	0.06	0	0	0.09	0	0.08	0.03	0.03	0	0.06	0	0.12	0.07	0	0
LOC108981241	1.13	0.23	0.44	0.37	0.56	0.45	0	0.31	0.39	0.49	0.29	0.63	0.07	0.14	0.08	0.51	0.16	0.08
LOC108981243	8.01	8.43	6.78	6.87	7.64	6.23	6.04	6.96	4.77	6.52	7.51	8.67	5.69	5.92	6.85	6.76	6.95	6.46
LOC108981244	48.24	42.88	39.92	58.46	24.82	35.9	3.03	19.67	13.18	39.85	42.07	31.27	20.1	17.24	36.76	122.27	28.63	31.42
LOC108981245	0.59	2.06	1.07	0.54	0.83	0.42	0	1.33	0.18	0.51	0.14	0.89	0.75	0.69	0.36	0	0.13	0.03
LOC108981248	0.02	0	0	5.04	5.7	10.16	7.26	0.12	9.29	1.56	3.75	0.02	0.11	0.02	9.03	5.71	2.31	0.73
LOC108981249	0	0	0	0	0.03	0	0	0	0	0	0	0	0	0	0	0	0	0
LOC108981252	0	0	0.02	0	0	0	0	0	0	0.02	0	0	0	0	0	0	0	0
LOC108981254	12.7	13.2	15.35	23.56	19.84	27.79	12.31	8.81	8.41	14.55	9.02	9.63	6.07	10.25	9.52	7.93	13.01	9.37
LOC108981255	13.61	13.52	14.43	9.47	7.36	10.16	6.03	9.59	5.26	9.88	8.74	11.04	14.91	12.76	6.7	7.82	7.54	7.31
LOC108981257	0	0	0	0	0	0	0	0	0	0	0	0.33	0	0	0	0	0	0
LOC108981264	27.95	33.51	26.81	18.62	30.24	8.49	3.16	18.58	9.99	9.17	11.12	15.03	14.14	16.5	13.67	6.88	6.95	4.24
LOC108981267	1.74	0.56	2.38	0.87	2.01	0.56	0.16	0.49	1.14	0.69	0.23	1.26	0.23	0.37	0.25	0.46	0.74	0
LOC108981268	4.88	2.98	4.46	2.15	2.83	2.41	0.14	1.65	0.67	1.45	1.02	1.9	1.52	1.66	0.54	1.29	0.57	0.35
LOC108981271	0	0	0.07	0.48	18.69	1.39	9.46	0.49	1.98	0.3	0	0.19	0.72	0.39	2.15	0.2	1.86	7.93
LOC108981272	8.71	9.03	8.92	8.47	8.83	8.53	8.28	8.26	7.21	9.64	8.64	10.44	7.37	8.69	8.13	6.53	10.08	10.35
LOC108981274	2.93	1.2	1.72	1.63	4.15	3.1	1.81	1.22	1.12	1.65	1.44	2.36	1.66	1.61	1.95	1.23	1.24	0.67
LOC108981276	0.37	0.59	0.24	0.71	1.06	0.46	5.07	0.55	1.67	14.25	4.16	4.45	6.58	4.94	12.14	6.43	29.52	45.75
LOC108981280	1.83	1.85	1.47	0.32	0.34	0.87	0.22	0.89	0.44	1.07	0.63	0.81	0	0.1	0.56	0	0	0
LOC108981281	12.75	14.14	13.4	8.28	9.49	7.85	8.68	12.76	9.18	11.64	9.78	10.45	9.06	11.46	8.91	8.66	8.75	7.22
LOC108981282	11.1	11.49	11.59	24.93	35.27	19.29	34.63	20.36	22.74	17.44	17.55	16.11	20.16	13.75	28.39	21.35	17.88	17.53
LOC108981288	3.5	3.21	3.44	1.84	5.89	1.57	8.28	6.83	2.81	3.43	2.82	4.27	4.62	4.02	7.38	5.42	5.27	3.3
LOC108981289	21.35	16.52	17.45	16.03	5.73	18.23	11.13	10.08	7.73	28.6	41.42	48.94	12.07	17.32	6.72	7.61	11.35	18.1
LOC108981290	21.78	22.8	27.07	42.2	69.37	32.03	74.67	38.71	70.14	43.87	44.46	35.92	35.04	30.56	80.56	45.3	42.79	41.78
LOC108981291	0.98	1.02	0.47	0.27	1.36	0.55	0.17	0.56	0.02	0.5	0.2	0.15	0.24	0.2	0.43	0.55	0.04	0.02
LOC108981292	0.07	0	0.02	0.05	0.7	0.02	4.41	0.26	1.26	0.37	0.08	0.03	0.21	0.11	2.99	2.38	0.44	0.93
LOC108981293	4.14	3.65	4.54	5.01	2.33	3.76	5.63	4.01	4.37	3.65	4.58	3.6	3.57	3.59	3.86	3.95	5.35	4.88
LOC108981294	88.06	66.93	85.4	69.65	47.04	72.1	77.16	73.84	72.72	82.23	79.45	95.4	66.43	72.34	67.61	92.88	70.62	69.5
LOC108981297	16.13	16.7	16.52	29.31	36.94	17.92	50.81	15.6	41.46	27.48	27.2	17.25	14.59	15.63	40.14	32.9	42.24	28.99
LOC108981298	1.14	1.15	0.86	0.55	0.23	1.25	0.75	1.06	0.4	0.95	0.87	0.5	1.04	1.32	0.21	0.7	0.58	0.36
LOC108981299	4.13	4.87	3.79	0.78	0.24	3.28	0.83	2.65	0.51	2.57	2.76	1.61	3.54	3.82	0.28	2.33	0.3	1.74
LOC108981302	0	0	0	0	2.33	0	4.04	0.04	0.86	0.5	0.29	0	0	0	12.41	0	0.39	0.77
LOC108981303	0	0	0	0.28	2.22	0	36.58	0.12	5.83	1.78	2.56	0.04	0.08	0.04	10.77	3.45	5.89	9.04
LOC108981304	38.82	49.44	43.58	38.25	40.84	26.43	44.62	45.47	48.27	49.33	36.77	40.59	51.31	46.87	44.8	42.9	47.69	40.44
LOC108981305	0.04	0.09	0.04	0.09	0.28	0.04	0.27	0	0.04	0.24	0.21	0.28	0.12	0.12	0.14	0.13	0	0.09
LOC108981306	0	0	0	0.03	0	0	0	0	0	0	0	0	0	0	0	0	0	0
LOC108981308	0.6	0.32	0.18	0.13	0.03	0.19	0.03	0.1	0.03	0.07	0.03	0.21	0.12	0.06	0.1	0	0.1	0
LOC108981310	0.2	0.41	0.13	0.18	0.38	0.17	4.47	0.34	0.72	2.75	0.27	0.25	0.78	0.6	2.81	0.83	4.59	4.07
LOC108981312	0	0	0.06	0.17	0	0.11	0.06	0.12	0	0	0	0	0	0	0.06	0.06	0.24	0.23
LOC108981314	1.68	1.58	1.67	1.5	1.59	1.6	1.93	2.45	1.53	2.11	2.14	2.57	2.39	2.76	1.86	1.67	1.31	1.35
LOC108981315	12.22	11.08	11.2	10.83	11.58	9.59	7.95	12.55	9.01	9.29	10.75	11.29	8.22	10.85	9.08	7.43	8.06	7.27
LOC108981316	17.47	18.05	19.31	17.93	15.3	17.27	15.68	16.8	14.84	16.92	24.88	17.68	14.01	14.77	13	17.89	16.74	17.03
LOC108981318	0.27	0.23	0.16	0.41	0.27	0.48	0.13	0.12	0.14	1.3	0.3	0.14	0.89	1.05	1.85	1.47	3.59	3.13
LOC108981319	9.51	8.59	9.88	13.37	12.11	12.33	7.62	10.5	7.56	14.55	14.97	12.79	11.62	10.84	9.43	6.1	8.8	9.21
LOC108981320	0	0	0	0	0.04	0.08	0	0	0	0	0.04	0	0.08	0.08	0	0	0	0.04
LOC108981321	32.66	29.91	30.77	26.96	21.04	27.09	12.75	45.56	18.97	25.42	16.17	23.43	27.86	29.69	12.96	18.53	22.59	20.89
LOC108981322	0.03	0.14	0	0	0	0	0.65	0.14	0.14	0.19	0	0	0	0	0.11	0	0	0.07
LOC108981323	38.52	25.98	35.39	46.8	44.78	55.25	15.49	20.99	24.53	32.75	33.73	38.26	29.7	24.75	21.04	21.02	22.62	22.06
LOC108981328	0	0	0	0.12	2.12	0.36	0.65	0.04	1.09	0	0	0.15	0	0	0.25	0	0.12	0
LOC108981329	0.3	0.54	0.15	0.13	0.27	0.08	0.4	0.13	0.23	0.31	0.52	0.26	0.53	0.48	0.4	0.1	0.13	0.13
LOC108981330	53.89	41.23	48.88	49.08	35.19	41.61	36.02	42.67	41.63	46.19	70.85	50.76	18.27	34.87	30.82	35.48	42.77	39.19
LOC108981331	0.02	0.06	0.04	0	0.04	0	0.02	0.02	0.04	0.17	0.02	0	0.04	0	0.08	0	0.1	0
LOC108981332	1.97	2.49	1.46	1.94	2.52	2.34	1.68	1.97	1.46	0.84	1.37	1.13	1.74	1.63	1.68	1.09	1.11	1.93
LOC108981333	16.69	18.8	17.02	25.08	20.9	15.99	41.12	20.26	35.53	30.85	27.01	28.31	32.33	24.92	39.12	20.95	39.09	30.87
LOC108981334	1.4	1.71	2.2	11.2	25.6	6.11	38.87	1.53	8.97	13.65	9.44	3.09	1.97	3.7	17.74	7.84	16.18	25.84
LOC108981335	0	0	0	0	0	0.02	0	0	0.05	0.03	0	0	0	0	0	0	0.03	0
LOC108981337	730.26	829.79	678.96	823.42	699.66	575.93	957.64	790.97	1064.6	1019.6	904.82	836.36	1035.89	828.3	876.12	779.24	1093.3	1131.07
LOC108981340	0	0	0	0	0	0	0	0	0	0.19	0	0	0	0	0	0.09	0	0.09
LOC108981341	161.29	207.21	161.67	86.49	38.11	65.38	62.26	158.26	95.9	217.52	286.08	184.87	170	218.12	37.19	153.25	121.6	212.74
LOC108981342	60.92	47.12	57.62	34.05	25.08	28.61	23.9	43.41	27.08	37.74	41.71	54.06	38.39	50.99	24.27	37.54	29.46	28.99
LOC108981343	7.34	8.52	6.09	10.11	9.95	7.82	14.95	9.22	10.57	10.59	7.39	7.38	10.62	11.86	13.24	7.82	11.2	11.38
LOC108981346	0	0.09	0	0	0	0	0	0	0	0	0	0	0	0	0	0	0	0
LOC108981347	27.21	24.03	23.35	22.23	13.62	28.44	29.41	29.42	35.55	52.5	34.21	28.61	47.15	37.94	33.32	35.87	74.91	55.32
LOC108981349	0.76	1.07	1.25	1.02	0.82	1.32	2.99	1.8	2.59	1.11	0.52	1.09	1.66	1.85	2.25	1.52	4.67	3.92
LOC108981351	0.05	0.22	0.05	0.05	0	0	0	0.06	0	0	0	0	0	0.1	0	0.11	0.06	0
LOC108981353	0	0	0.12	5.63	8.64	8.16	8.89	0.25	8.08	2.45	1.91	0.38	0	0.11	9.27	1.31	1.44	1.09
LOC108981354	0	0.04	0	0	0	0	0	0	0	0	0	0	0.04	0	0	0	0	0
LOC108981355	0	0	0	0	0	0	0.03	0	0.03	0	0	0	0	0	0	0.2	0.38	0.41
LOC108981356	0.03	0	0	0	0	0	0.02	0	0.02	0.04	0	0	0.03	0.03	0.04	0.03	0	0
LOC108981357	93.33	96.06	87.06	199.98	258.16	163.77	233.31	94.37	174.98	119.47	110.22	120.75	139.82	119.71	213.92	113.06	212.88	212.88
LOC108981358	0	0	0	0	0	0	0	0	0	0	0	0	0	0	0	0	0	0
LOC108981359	0.84	0.45	0.6	0.97	0.92	0.62	1.16	1.49	1.58	1.87	2.74	1.02	1.77	1.53	1.86	0.96	2.03	0.6
LOC108981360	12.27	9.8	12.09	11.37	12.26	8.99	10.14	10.49	11.93	13.43	11.04	14.94	13.56	11.9	13.38	8.09	11.76	13.39
LOC108981363	0.54	0.57	0.66	0.83	1.39	0.71	0.68	1.14	0.65	1.02	0.53	1.02	1.3	1.62	1.6	0.29	0.45	0.37
LOC108981364	0.08	0.21	0.08	0.12	0.24	0.27	0.26	0.27	0.23	0.4	0.44	0.21	0.29	0.25	0.28	0.2	0.19	0.11
LOC108981365	0.36	0.35	0.31	0.3	0.24	0.21	0.44	0.47	0.33	0.54	0.32	0.59	0.86	0.52	0.64	0.19	0.08	0.12
LOC108981366	13.95	8.4	14.94	10.19	8.95	9.45	3.89	10.11	5.41	12.17	16.3	15.24	18.53	12.84	6.01	7.69	4.85	8.75
LOC108981367	11.16	10.76	11.73	11.28	8.59	10.11	12	16.26	11.91	15.56	15.11	16.12	8.54	14.28	11.91	8.52	10.64	10.84
LOC108981368	75.59	76.68	70.89	18.19	21.14	15.58	13.43	40.24	11.42	18.79	22.97	31.85	61.18	44.66	13.7	35.82	20.52	27.09
LOC108981369	44.46	57.41	51.24	9.33	5.29	8.57	7.03	36.27	11.32	23.34	29.66	23.09	36.43	28.95	7.12	10.28	16.84	21.3
LOC108981370	2.74	2.51	1.79	2.61	2.6	2.28	1.51	2.66	1.09	1.54	2.09	2.29	2	3.39	2.65	1.48	1.36	1.43
LOC108981371	6.24	10.34	8.94	10.35	16.73	6.29	7.84	7.6	8.03	4.88	7.52	6.63	10.45	7.53	11.61	7.33	4.94	6.18
LOC108981372	0.1	0	0	0.31	0.18	0	2.33	0	0.04	0.04	0.24	0.07	0.1	0.23	0.11	1.5	0	0.04
LOC108981375	7.47	5.81	7.99	7.8	8.42	7.01	7.34	10.88	5.53	8.92	8.44	8.5	14.24	9.76	7.24	5.12	8.58	6.88
LOC108981376	0.67	1.12	0.41	0.32	0.84	0.35	0.61	0.71	0.31	0.43	0.27	0.78	0.36	0.77	0.34	0.7	0.19	0.22
LOC108981378	22.84	21.46	22.26	23.95	26.32	15.16	30.75	26.77	30.35	35.78	33.4	22.35	28.47	22.28	32.06	23.25	29.99	32.03
LOC108981379	1.42	1.15	1.27	2.14	1.24	2	0.55	1.57	0.72	1.65	1.45	1.49	1.39	1.61	0.7	0.44	0.7	0.63
LOC108981384	31.45	30.57	31.96	42.9	46.55	41.42	29.2	28.01	34.39	31.62	30.71	30.5	20.02	25.65	38.68	31.56	30.1	33.38
LOC108981385	16.96	18.24	19.91	13.76	12.1	16.75	10.9	18.81	11.99	17.29	10.65	15.39	17.02	22.39	11.95	9.81	15.61	12.33
LOC108981386	7.99	7.35	9.46	18.63	16.39	17.55	12.9	6.47	6.71	7.94	9.33	10.07	7.83	6.46	8.85	8.76	9.29	8.12
LOC108981387	0.07	0.17	0.03	1.56	5.51	3.92	6.76	0.32	3.36	1.18	1.26	0.46	0.1	0.2	3.22	4.04	1.19	1.04
LOC108981388	0	0	0	0.11	0	0	0.08	0.11	0.12	0.2	0	0.03	0.39	0.11	0.08	0.11	0.23	0.23
LOC108981389	0	0	0	0	0	0	0	0	0	0	0	0	0	0	0.04	0	0	0
LOC108981392	8.31	11.28	8.54	7.59	10.63	13.06	8.91	5.22	6.66	7.15	4.67	4.73	6.71	5.1	4.16	11.11	5.63	6.16
LOC108981394	0.07	0.74	0.15	0.02	0	0.22	0	0.02	0.05	0	0.02	0.02	0.38	0.15	0.05	0.02	0.05	0.05
LOC108981395	4.54	3.17	5.18	4.23	5.13	2.99	1.45	4.72	1.56	3.66	2.79	4.37	2.44	2.68	2.9	2.25	2.08	2.06
LOC108981396	60.85	60.34	48.47	194.07	262.27	166.98	206.95	70.91	154.17	69.76	69.15	76.08	124.43	86.55	222.33	91.31	184.81	170.25
LOC108981397	0	0	0	0	0	0.19	0.1	0	0	0	0	0	0	0	0	0	0	0
LOC108981398	27.74	25.37	26.77	34.29	40.02	34.02	25.87	28	27.04	23.92	22.81	24.05	23.03	23.85	25.5	23.76	20.98	24.45
LOC108981399	16.83	17.99	15.11	19.32	14.22	13.43	7.01	13.01	8.2	20.21	28.88	23.11	11.72	12.61	10.38	9.64	8.43	7.88
LOC108981400	0.09	0	0	0.22	0.08	0.2	0	0.02	0.1	0.09	0.09	0.06	0.12	0.07	0.05	0.09	0	0
LOC108981402	27.45	23.88	33.93	9.3	9.09	16.71	5.47	16.24	4.7	13.28	13.04	27	18.89	18.82	5.11	4.99	6.92	8.6
LOC108981403	0.46	265.54	0.66	1.74	10.12	2.58	169.28	103.09	82.54	9.21	2.59	0.86	2.91	2.06	32.72	49.89	13.74	33.38
LOC108981406	24.03	20.94	26.32	22.47	29.09	20.03	13.32	19.79	14.1	21.86	22.82	31	16.78	21.66	15.45	14.62	14.7	15.08
LOC108981407	36.36	36.19	37.53	37.62	33.77	41.01	22.92	30.65	23.03	35.85	35.58	45.3	37.78	28.64	19.87	26.03	20.9	23.43
LOC108981408	24.86	34.26	27.06	32.75	28.73	28	71.97	24.58	69.92	69.78	60.82	71.07	37.28	46.51	95.9	50.17	98.6	72.85
LOC108981409	50.43	62.33	56.94	48.91	42.67	38.72	51.43	52.64	50.35	53.28	58.08	53.87	79.88	55.4	55.39	45.6	62.07	65.17
LOC108981410	24.03	24.74	23.55	39.23	38.56	41.51	22.71	21.12	16.56	20.35	25.06	25.61	26.46	22.65	22.66	17.48	21.18	20.87
LOC108981411	0.18	1.78	1.06	0	0	0.06	0	0.06	0	0.07	0.06	0	0	0.23	0	0	0	0
LOC108981416	7.45	5.42	7.28	7.75	6.85	7.23	6.17	6.82	5.14	5.85	8.08	8.06	3.71	5.69	6.05	5.7	5.32	5.21
LOC108981417	34.34	32.74	39.24	31.02	29.35	17.82	25.71	37.34	37.97	42.06	47.25	38.4	35.26	37.36	33.57	40.44	33.27	36.81
LOC108981418	52.94	53.36	53.92	99.6	65.96	86.71	104.79	58.52	106.31	127.08	135.68	108.03	39.71	59.81	91.35	72.96	107.91	100.23
LOC108981419	0.37	0.67	0.4	0.48	1.06	0.71	1.01	0.53	0.61	1.27	0.58	0.66	1.39	0.81	2.56	0.95	2.83	4.17
LOC108981421	101.56	51.57	83.43	7.53	6.86	4.19	0.15	25.42	1.33	29.61	86.37	99.14	60.74	55.39	3.63	2.46	1.19	9.65
LOC108981422	15.95	22.38	18.12	25.06	24.85	19.97	46.52	24.32	31.82	26.58	29.43	21.36	25.91	23.43	39.99	22.49	31.7	26.82
LOC108981424	0.03	0.21	0.07	0.03	0.04	0	0	0.04	0	0	0	0.13	1.02	0.26	0	0	0	0.11
LOC108981425	9.54	14.02	7.64	3.34	4.5	5.85	8.6	2.91	0.93	12.31	14.27	11.12	11.48	11.55	12.89	17.9	8.85	14.2
LOC108981426	0	0	0	0	0	0	0.07	0.03	0	0.21	0	0	0	0.21	0.2	0.25	0.2	0
LOC108981427	0	0	0	0	0	0	0	0	0	0	0	0	0	0	0	0	0	0.13
LOC108981428	0.54	1.21	1.19	1.15	0.98	0.77	0.54	0.88	0.83	0.43	1.32	1.12	0.89	0.74	1	0.79	0.1	0.55
LOC108981429	9.49	8.62	10.6	10.32	9.17	8.73	4.62	9.99	4.46	10.61	10.01	11.56	13.58	11.93	5.55	5.73	7.13	8.4
LOC108981430	17.68	25.58	12.69	7.31	11.67	6.44	1.74	6.78	6.23	7.44	19.11	8.16	15.67	11.02	9.07	43.18	4.66	6.91
LOC108981431	6.86	10.32	6.07	6.05	6.58	7.1	17.85	16.58	14.38	16.09	10.66	18.61	18.14	16.27	17.64	9.92	12.73	17.19
LOC108981432	17.26	15.62	19.75	38.67	28.37	33.39	16.47	22.15	18.98	35.39	47.83	42.13	12.1	19.01	22.27	15.44	19	19.72
LOC108981433	128.99	120.32	134.14	122.91	110.3	107.14	76.95	140.79	142.21	144.13	183.47	135.89	175.99	116.98	113.27	145.23	91.82	133.45
LOC108981434	4.39	3.6	3.88	3.73	6.07	4.49	3.6	3.9	2.14	4.68	3.59	4.83	4.16	4.26	4.49	3.25	2.99	2.76
LOC108981435	31.16	31.84	32.22	28.18	26.13	24.14	18.82	26.18	22.09	26.87	28.54	37.6	52.66	37.86	20.16	24.07	23.41	26.6
LOC108981437	0	0.03	0	0.03	8.37	1.36	1.13	0.13	0.1	0.47	0	0.03	0	0.03	1.3	0.39	0.07	0
LOC108981438	0.06	0.42	0.75	0.48	1.22	0.39	0.27	1.28	0.82	0.07	0.25	0.57	0.06	0.27	0.17	0.44	0.3	0
LOC108981441	3.52	3.67	3.44	4.96	4.91	3.89	2.84	4.31	2.66	3.37	2.87	4.31	2.5	3.57	3.86	2.71	3.47	3.41
LOC108981442	12.4	14.28	10.96	28.39	67.93	43.23	105.26	18.31	60.08	10.85	13.64	6.78	10.83	18.41	36.25	23.34	18.8	24.48
LOC108981443	0	0.03	0.09	0	0.03	0	0.06	0.06	0.06	0.03	0	0	0	0	0	0	0	0
LOC108981444	31.38	27.35	29.07	22.12	16.63	22.44	19.42	24.67	25.05	24.91	27.51	27.91	16.13	24.5	20.29	18.09	23.62	24.08
LOC108981445	31.21	14.24	21.6	10.35	20.03	51.81	51.39	33.89	26.41	46.38	38.38	48.67	37.35	44.18	26.15	89.22	29.35	29.12
LOC108981446	38.35	23.26	35.35	19.04	14.57	18.73	9.03	25.57	12.25	26.29	25.4	30.44	19.97	36.66	10.93	15.6	18.27	24.91
LOC108981447	14.36	10.06	11.69	31.85	84.17	48.22	96.68	18.22	77.27	25.22	13.05	15.86	7.55	10.97	53.25	23.9	21.85	17.72
LOC108981448	41	43.7	39.76	37.37	40.06	41.37	21.56	50.72	33.82	24.44	24.23	32.74	28.34	35.16	35.33	20.85	32.03	29.4
LOC108981449	4.27	4.42	4.22	5.4	5.64	4.77	4.45	4.3	4.12	3.56	4.11	4.14	5.11	3.67	7.23	4.62	3.89	5.81
LOC108981450	0.52	0.73	0.57	0.41	0.53	1.01	0.89	0.74	0.55	0.73	0.43	0.94	0.78	1.17	0.5	0.38	0.69	0.49
LOC108981451	0	0	0	0.99	0.98	0.54	5.22	0.75	11.69	2.99	3.22	0	0.22	0.22	23.18	5.78	2.73	0.68
LOC108981452	1	0.83	0.8	2.11	1.68	1.3	2.81	1.02	0.85	2.58	1.21	0.6	2.25	1.05	1.83	1.03	1.28	0.91
LOC108981453	0.73	1.41	1.62	10.67	7.74	8.52	3.39	3.14	1.85	5.91	4.17	2.74	3.31	3.26	4.64	1.82	3.94	4.04
LOC108981454	17.78	16.72	17.88	28.4	19.27	18.2	9.28	14.91	10.46	20.93	11.72	13.73	18.64	19.29	14.69	7.67	20.13	14.05
LOC108981455	34.81	30.93	36.98	42.89	31.77	38.53	20.52	34.77	24.45	21.58	22.98	22.85	19.47	23.35	18.77	37.49	26.58	29.59
LOC108981456	12.82	9.06	11.44	13.38	16.87	14.87	8.81	11.84	7.73	13.43	13.86	19.76	14.1	16.22	9.8	7.25	6.75	6.68
LOC108981457	28.15	32.19	22.04	25.95	24.74	24.43	33.18	13.4	33.33	27.96	20.27	20.13	7.24	9.81	21.69	22	21.42	17.91
LOC108981458	3.92	4.5	4.17	3.82	5.08	5.41	5.95	3.81	5.22	4.81	4.77	3.38	2.54	2.94	4.61	4.61	4.93	4.53
LOC108981459	21.77	21.9	18.16	32.39	37.55	26.88	28.38	26.65	35.11	29.03	32	23.12	30.87	25.44	38.64	30.79	29.2	26
LOC108981460	102.84	85.53	92.53	182.27	200.27	181.71	143.56	77.78	111.74	82.82	82.45	108.02	159.03	98.21	128.55	85.92	114.91	152.81
LOC108981462	0.11	0.04	0.12	0.06	0.08	0.23	1.47	0.05	0.12	0.56	0.42	0.26	0.12	0.22	0.43	0.07	0.47	0.28
LOC108981463	1.19	1.07	2.51	2.31	2.45	0.67	2.55	2.17	1.84	2.83	0.52	1.24	5.19	3.37	1.31	0.84	7.64	6.2
LOC108981464	11.64	17.04	15.49	13.84	16.45	16.24	11.44	16.47	12.3	12.61	9.99	14.03	19.09	17.04	13.78	8.8	10.65	11.7
LOC108981465	0.46	0.64	0.32	0.92	2.95	1.32	5.81	1.52	3.13	0.98	1.98	0.79	0.88	1.11	4.45	3.05	1.25	2.21
LOC108981466	11.94	12.03	12.17	13.82	10.72	12.23	19.3	15.23	11.04	21.68	19.69	21.02	25.94	19.99	13.96	12.87	10.54	14.21
LOC108981467	0.74	0.47	0.45	0.18	0.1	0.47	0.29	0.57	0.48	0.71	0.63	0.78	1.15	0.87	0.29	0.18	0.87	0.57
LOC108981470	10.63	9.07	10.13	13.93	4.01	19.56	6.92	4.11	6.54	51.2	86.47	51.54	5.81	15.72	5.59	8.1	15.24	22.28
LOC108981471	24.75	24.35	27.74	27.24	24.58	22.01	18.47	21.68	18.31	23.1	20.36	26.07	24.75	22.73	20.65	17.71	20.92	20.1
LOC108981472	2.52	11.05	3.13	8.62	2.8	5.99	10.76	26.41	4.58	3.54	1.2	3.33	8.59	4.68	19.77	3.53	7.45	1.59
LOC108981473	103.32	89.07	94.18	141.01	156.26	124.87	103.94	85.53	105.98	100.06	112.62	114.29	83.56	96.84	116.86	99.79	103.84	95.51
LOC108981474	4.05	3.21	3.2	4.15	3.8	5.01	4.89	2.46	2.81	4.71	3.62	3.16	2.38	2.42	3.46	2.51	2.39	3.72
LOC108981475	163.34	171.86	152.84	150.56	126.83	121.71	163.07	126.68	180.6	154.69	157.13	141.1	120.53	141.55	152.99	131.74	189.42	168.02
LOC108981476	5.23	5.07	5.26	5.71	5.78	6.5	4.68	5.89	5.59	5.72	5	8.54	8.25	6.46	5.34	3.92	5.22	4.55
LOC108981477	56.26	59.68	69.42	63.41	65.76	53.43	60.62	66.76	68.11	81.18	71.82	81.98	111.56	81.11	75.43	65.98	52.42	65.08
LOC108981478	0.31	0.58	0.39	0.4	0.38	0.18	2.2	1.07	0.69	2.05	0.31	0.38	1.15	1.22	2.64	1.01	4.24	3.44
LOC108981482	0.15	0.11	0.22	3.71	5.23	8.29	32.19	1.87	13.51	2.61	10.78	0.21	0.53	0.32	21.16	16.58	5.41	5.78
LOC108981485	67.87	49.58	57.82	98.21	112.23	102.06	72.65	73.29	81.16	46.61	27.49	31.73	58.9	65.96	87.98	49.42	39.9	47.1
LOC108981487	12.56	14.5	14.95	22.7	20.7	13.82	18.73	22.61	18.51	9.14	12.92	12.13	10	12.62	17.84	13.01	12.45	14.07
LOC108981488	8.41	7.19	7.98	6.27	6.28	6.11	5.95	8.67	5.64	6.99	5.56	6.55	8.79	5.53	6.63	5.4	6.3	6.27
LOC108981490	0	0	0	0	0.04	0	0.1	0	0	0	0	0	0	0	0.02	0	0	0
LOC108981492	194.86	179.4	194.14	191.42	178.77	138.19	69.6	159.59	141.1	173.7	158.66	192.3	261.25	197.74	149.17	71.76	127.63	104.67
LOC108981493	22.74	20.43	22.17	29.46	27.67	26.75	18.55	19.89	17.28	22.93	22.36	22.01	20.34	18.88	25.15	19.61	22.84	18.18
LOC108981494	1.73	2.24	1.35	3.59	4.77	1.75	3.76	2.13	3.93	8.45	6.72	7.02	5.05	3.99	4.12	0.68	4.4	4.21
LOC108981495	4.49	7.22	4.75	22.32	86.99	9.6	0.42	5.98	3.8	13.32	5.12	21.61	0.77	6.95	21.86	0.98	3.35	0.62
LOC108981497	7.98	7.38	9.53	15.02	16.56	8.63	11.35	16.14	17.87	11.27	7.29	10.45	10.75	11.25	17.78	4.97	14.45	7.97
LOC108981498	2.81	2.09	2.22	1.32	1.52	1.24	1.52	2.11	0.82	1.9	2.37	1.63	2.23	2.43	1.31	1.21	0.85	1.22
LOC108981499	0.57	0	0.06	0	247.24	2.58	0.07	0.13	0.59	0.49	0	0.18	0.06	0.12	0.47	0.12	0.2	0.26
LOC108981501	0.13	0.14	0	0	0.28	0.14	2.65	0.27	0	0.15	0	0.38	1.03	0.63	1.54	0	0.98	1.1
LOC108981502	14.74	15.08	15.08	21.52	25.54	19.28	21.86	17.87	19.51	17.68	16.17	15.54	12.85	17.67	21.96	18.74	20.06	17.16
LOC108981503	0.3	2.07	2.17	0.48	0.7	2.31	1.38	0.8	0.75	3.38	1.42	0.68	2.2	1.54	0.69	0.59	2.01	0.99
LOC108981504	10.27	8.45	11.05	11.21	12.73	12.14	8.85	11.61	10.71	14.35	15.14	19.15	10.05	12.92	8.45	12.01	8.89	10.76
LOC108981505	28.54	30.12	29.18	13.83	13.35	17.32	9.15	25.78	10.95	15.68	18.79	23.05	37.36	29.55	9.86	15.72	10.7	15.15
LOC108981506	10.54	8.59	9.55	6.4	8.12	6.13	8.15	14.51	9.87	21.59	16.37	19.61	12.01	13.91	8.94	6.13	10.18	11.41
LOC108981510	72.56	65.79	75.55	59.72	52.12	57.93	34.66	75.97	47.45	64.96	61.18	60.69	92.92	77.95	45.71	52.9	43.62	44.6
LOC108981512	7.27	8.3	5.17	12.05	10.95	2.53	3.31	5.08	10.28	9.78	2.95	4.96	1.12	0.63	12.39	2.06	9.06	3.21
LOC108981513	0.02	0.05	0	0.05	0.13	0	0.49	0.1	0.13	0.33	0.05	0.12	0.21	0.14	0.03	0.1	0.21	0.08
LOC108981515	0.33	0	0.11	0.37	0.58	0.22	0.31	0.04	0.08	0.4	0.14	0.14	0.14	0	0.19	0.18	0.27	0.15
LOC108981516	13.8	11.53	10.4	3.87	5.43	9.75	16.99	11.42	11.66	18.14	16.36	13.76	8.15	10.75	13.48	21.22	6.93	7.75
LOC108981517	0	0	0	0	0	0	0	0	0	0	0	0.02	0	0	0	0	0	0
LOC108981519	4.98	0.75	7.38	4.14	8	35.72	17.2	3.69	20.4	7.44	2.77	0.92	0.53	1.55	40.61	21.61	3.39	1.36
LOC108981522	12.43	11.62	11.41	8.48	14.23	11.13	5.51	14.07	9.35	8.18	6.01	10.39	14.73	13.01	9.63	15.25	8.16	6.91
LOC108981523	9.58	10.86	11.01	12.07	10.92	11.14	8.2	10.66	8.93	9.42	10.84	8.53	11.78	9.06	10.52	10.29	10.88	9.06
LOC108981524	36.59	54.97	40.34	31.26	26.86	24.46	16.96	42.67	29.11	29.76	29.28	29.03	35.44	33.04	25.55	33.52	30.56	29.97
LOC108981525	3.19	5.25	3.29	12.25	16.02	13.05	10.66	6.45	5.43	5.58	4.53	6.84	6.4	6.57	11	5.45	7.73	6.44
LOC108981527	0.03	0.03	0.03	0.14	0.03	0.17	0.48	0.08	0.14	0.12	0.29	0.13	0.03	0.13	0.09	0.08	0.06	0
LOC108981528	7.18	6.15	6.83	7.4	7.01	7.49	4.73	5.92	4.27	5.42	7.52	6.1	5.94	4.43	4.13	5.01	4.95	5.21
LOC108981529	0.08	0.31	0.3	8.32	8.51	7.5	23.47	4.31	25.92	2.43	1.95	0.36	0.82	0.47	23.13	2.92	3.36	1.74
LOC108981530	0.15	0	0	0.44	0	0.15	0.08	0	0.23	0	0.22	0.42	0.28	0.07	0	0	0.08	0
LOC108981531	39.57	26.67	33.64	48.79	49.01	43.21	38.61	24.27	35.31	31.82	32.27	28.46	22.26	23.47	36.68	27.17	30.49	29.39
LOC108981532	22.81	18.1	21.39	39.6	34.17	41.91	27.55	23.18	30.36	18.95	20.85	16.21	16.98	20.59	34.46	38.79	21.98	26.43
LOC108981536	0.63	0.85	0.88	0.67	1.21	0.1	0	1.17	0.2	0.41	0.29	1.38	1.24	1.21	0.16	0	0.14	0
LOC108981537	2.16	3.19	2.43	6.83	5.48	4.67	13.34	5.28	5.66	6.68	6.58	4.34	5.4	5.61	10.4	4.29	6.84	5.44
LOC108981539	0.18	0.37	0.24	0.31	0.32	0.12	0.32	0.44	0.13	0.13	0.36	0.17	0.23	0.17	0.06	0.6	0.19	0.69
LOC108981541	7.72	8.61	7.85	7.76	5.73	6.63	10.18	7.51	7.82	10.29	9.73	10.02	7.67	8.47	8.45	8.29	7.97	7.09
LOC108981542	1.74	7.86	2.29	2.91	6.59	0.06	0.35	4.15	2.08	1.17	2.2	3.32	6.08	5.24	1.52	1.15	0.12	0.64
LOC108981543	0.84	0	1.2	7.02	11.24	18.06	0.88	3.86	3.24	4.18	1.69	0.83	0.38	0.29	17.35	2.82	2.12	7.25
LOC108981544	7.79	9.34	5.78	21.68	14.93	15.31	26.08	12.37	26.19	23.56	6.58	16.01	8.93	12.92	25.73	13.66	39.13	20.33
LOC108981545	8.22	7.53	8.99	6.88	5.6	2.53	2.82	4.14	4.05	6.53	4.49	7.37	5.31	4.91	3.13	3.36	3.58	2.78
LOC108981549	5.59	7.95	5.02	5.15	6.57	4.37	10.84	5.16	6.47	6.13	4.45	6.41	8.89	7.7	6.4	7.24	8.57	8.48
LOC108981554	0	0	0	0	0	0	0	0	0	0	0	0	0.03	0.03	0	0	0	0
LOC108981555	6.49	8.46	7.42	4.79	5.87	3.2	1.01	14.9	3.97	4.01	10.39	6.72	4.26	7.64	1.83	1.5	1.43	3.82
LOC108981561	5.92	15.74	7.2	6.6	5.69	9.3	9.06	9.85	11.5	12.09	12.71	16.19	12.4	11.84	11.51	6.07	12.16	10.31
LOC108981562	25.05	27.42	22.78	46.05	25.83	51.25	24.88	36.46	34.02	42.88	38.62	49.77	25.41	31.47	32.11	22.63	30.36	26.11
LOC108981563	2.14	2.94	4.06	0.52	3.21	4.74	3.32	3.35	4.1	1.42	1	3.76	0.77	3.84	1.07	3.06	1.54	3.43
LOC108981566	12	12.65	12.82	11.45	9.58	12.19	10.39	14.18	8.67	14.09	16.43	13	18.76	12.89	8.9	9.06	9.42	14.36
LOC108981568	0.59	0.87	1.15	0.88	1.07	0.52	1.1	0.96	0.86	0.81	0.46	0.86	1.06	0.98	0.57	0.7	0.92	0.46
LOC108981570	1.23	0.85	1.69	2.51	10.89	3.91	1.78	2.22	2.2	2.78	5.75	1.37	0.75	1.41	2.5	3.75	1.49	3.35
LOC108981575	0.78	1.57	1.96	3.2	2.03	2.98	6.75	2.29	2.88	2.73	2.94	1.51	2.48	2.93	3.08	3.85	2.26	2.99
LOC108981576	0	0	0	0.56	0.32	0.82	0	0	0	0	0	0	0	0	0	0	0	0.05
LOC108981578	0	0	0	0.11	0.06	0.11	0.06	0.06	0.06	0.31	0	0.1	0.27	0.31	0.17	0	0.23	0
LOC108981580	4.17	2.76	5.09	3.17	2.37	3.32	7.2	5.19	2.55	8.13	5.7	4.94	6.87	6.76	4.95	3.5	2.71	6.26
LOC108981581	9.29	8.62	8.93	9.53	9.24	10.57	6.53	7.22	6.73	6.58	6.63	8.62	8.24	6.94	8.25	5.68	6.71	9.51
LOC108981582	19.38	23.99	17.31	11.35	10.39	11.36	6.73	20.24	9.08	12.44	12.05	11.94	15.76	18.08	8.01	10.96	9.44	11.74
LOC108981583	14.74	9.92	14.83	12.68	17.5	34.16	12.89	14.55	14.59	18.95	30.23	13.7	8.73	10.81	22.5	41.27	13.49	15.07
LOC108981584	10.08	13.97	10.07	27.87	31.2	21.03	34.83	16.24	24.88	16.88	17.27	16.05	23.7	17.6	31.89	13.22	28.56	25.54
LOC108981586	9.92	13.36	12.29	11.89	12.28	9.25	13.81	13.23	14.06	14.24	16.09	10.95	13.04	13.25	11.08	12.3	14.46	11.43
LOC108981587	12.32	7.98	11.84	21.51	14.27	26.78	12.66	18.47	13.73	9.68	8.26	5.64	9.51	11.25	11.6	9.61	19.49	12.02
LOC108981588	4.17	4.39	4.58	5.81	5.72	4.24	4.87	6.13	4.35	5.39	5.52	4.96	3.46	5.83	4.51	4.23	4.2	3.65
LOC108981589	5.28	7.14	6.43	8.53	8.49	7.69	9.33	9.32	8.26	7.49	5.96	5.7	14.34	8.95	11.35	6.86	7.79	7.71
LOC108981590	0	0.03	0	0	0	0	0	0	0	0	0	0	0	0	0	0	0	0
LOC108981593	0	0	0	0.33	0	0	0	0	0	0	0	0	0	0.31	0	0	0	0
LOC108981594	0.13	0.07	0.03	0.03	0.07	0.37	0.97	0.34	0.65	1.16	0.1	0.06	0.73	0.75	0.38	0.06	2.65	1.67
LOC108981597	0	0.01	0	0	0	0	0.17	0	0	0.03	0.01	0	0	0.05	0.1	0.06	0.16	0.04
LOC108981601	0.06	0.13	0.4	0.31	0.17	0.11	0.05	0.13	0.1	0.31	0.59	0.28	0.09	0.19	0.08	0.06	0.1	0.03
LOC108981602	0.27	0.02	0.26	0.21	0.56	0.16	0.38	0.41	0.13	0.12	0.15	0.26	0.21	0.26	0.18	0.08	0.16	0.22
LOC108981605	0	0	0	0	0	0	0	0	0	0	0	0	0	0	0	0.05	0	0
LOC108981606	0.45	0.55	0	0	0.48	0.09	0.19	0	0	0.4	0.36	0	0	0.51	0.19	0	0	0.09
LOC108981607	52.75	58.61	50.26	111.18	137.12	93.52	111.66	58.69	98.24	58.05	67.93	66.16	65.89	58.26	96.76	63.88	68.18	85.55
LOC108981608	28.4	27.81	32.73	24.13	26.98	26.46	19.01	34.22	23.38	27.1	22.2	34.28	40.69	34.14	22.1	20.66	19.63	26.5
LOC108981609	34.85	39.21	33.46	36.69	37.12	30.3	34.01	30.8	30.84	39.24	31.82	37.48	79.33	45.47	38.01	35.28	34.8	39.06
LOC108981610	33.65	27.63	33.98	61.74	64.53	48.76	57.46	42.78	51.49	58.86	63.71	54.11	38.42	42.84	59.36	50.53	69.79	62.98
LOC108981611	12.53	13.08	13.75	11.83	13.96	11.53	10.82	13.37	8.73	11.81	12.49	12.2	11.15	11.56	10.6	11.95	9.87	9.76
LOC108981612	9.69	7.75	8.91	9.66	10.36	11.19	6.98	8.12	6.48	6.59	7.4	10.63	11.85	10.49	8.9	6.52	7.2	6.75
LOC108981613	33.93	37.72	38	48.95	56.46	38.88	74.44	42.96	64.58	45.75	46.12	39.18	69.15	47.28	65.93	46.33	62.45	74.7
LOC108981614	6.46	4.49	4.7	4.32	7.12	4.25	4.45	4.22	2.66	3.7	5.1	4.18	3.7	3.88	2.83	4.24	2.85	4.27
LOC108981615	2.85	11.42	7	0.82	0.29	6.39	2.87	2.4	1.23	3.33	1.71	2.37	2.37	2.77	0.77	1.21	0.91	0.8
LOC108981618	1.01	1.89	1.11	1.09	0.71	1.02	7.91	2	2.53	5.95	2.06	2.66	5.66	4.24	5.32	2.01	5.84	5.3
LOC108981619	21.02	24.79	20.34	33.89	32.19	32.97	39.49	28.8	39.36	30.28	38.9	32.98	16.57	24.81	30.19	24.58	28.42	25.89
LOC108981620	0	0	0.05	0.08	0	0	0.06	0.44	0.69	1.71	0.5	0.68	3.25	0.58	6.12	0.16	8.32	1
LOC108981622	0.16	0.11	0.17	0.36	1.66	0.39	0.33	0.33	0.29	0.33	0.81	0.19	0.17	0.27	0.38	0.4	0.2	0.39
LOC108981623	0.12	0.06	0.15	0.12	2.7	0.2	0.99	0.22	0.61	0.33	0.17	0.1	0.15	0.04	0.34	0.52	0.5	0.18
LOC108981625	1.45	1.98	1.95	4.09	3.49	3.77	6.99	1.15	0.87	3.62	3.82	1.81	2.54	2.96	1.84	1.69	5.14	4.09
LOC108981626	21.66	14.99	20.43	20.51	18.84	17.1	11.91	15.97	11.83	14.89	15.2	19.55	19.42	14.08	18.2	11.01	13.57	15.55
LOC108981628	5.19	5.32	6.25	3.71	3.07	4.38	3.54	5.37	2.18	3.03	4.41	4.22	3.73	6.02	3.17	3.37	1.84	2.55
LOC108981631	0	0	0	0.03	0.03	0	0	0	0.13	0	0	0	0	0	0	0	0	0
LOC108981633	0	0	0	0	0	0	0	0	0	0	0.21	0	0	0	0	0	0	0
LOC108981635	0	0	0	0	0	0	0	0	0	0	0	0	0	0	0	0.03	0	0
LOC108981638	0	0	0	0	0.13	0	0.07	0.03	0.1	0.03	0	0.03	0.03	0.03	0.07	0.06	0	0.03
LOC108981641	0	0	0	0	0	0	0	0	0.02	0	0	0	0	0	0	0	0	0
LOC108981643	0	0	0	0	0	0	0	0	0	0.4	0	0	0	0.11	0	0	0.25	0
LOC108981644	0	0	0	0	0	0	0	0	0	0	0	0	0	0	0.59	0	0	0
LOC108981645	0.79	1.1	0.98	2.71	2.32	3.5	5.01	8.65	11.58	16.76	4.24	5.37	10.77	5.48	39.96	12.32	72.06	14.48
LOC108981646	9	13.55	10.94	12.24	14.07	13.88	9.6	11.02	11.47	7.53	8.73	10.72	9.28	9.03	11.14	11.66	6.14	6.82
LOC108981647	51.73	60.42	54.1	28.56	26.85	15.67	2.61	50.92	7.34	26.3	8.33	57.87	52.04	71.71	6.33	3	20.67	9.53
LOC108981648	4.71	9.32	5.47	9.38	7.62	4.98	10.56	4.68	6.25	8.51	6.03	5.82	3.63	4.17	7.82	5.02	9.63	7.19
LOC108981649	19.39	20.22	19.2	14.7	14.89	11.85	17.74	22.59	18.85	18.98	19.59	16.92	22.37	20.5	17.1	19.17	20.19	20.34
LOC108981654	0	0	0	0	0	0.07	0	0	0	0	0	0.13	0	0	0	0	0	0
LOC108981655	0.05	0.09	0.18	0.99	0.53	0.32	0.61	0.28	0.19	0.59	0.04	0.25	0.22	0.26	0.28	0.13	0.75	0.28
LOC108981656	0	0	0.22	0	0	0.22	0.87	0.28	0	0.06	0	0	0	0	0.12	0.49	0.75	0.74
LOC108981657	0	0.25	0	0	0	0	0	0	0	0	0	0	0	0	0	0	0	0
LOC108981658	2.86	4.5	6.78	2.37	8.55	7.45	14.17	5.1	4.54	4	1.14	3.39	1.41	7.94	6.1	4.09	3	3.52
LOC108981659	21.41	18.7	19.27	10.23	2.89	13.22	17.18	7.99	10.94	10.03	10.02	12.22	7.57	7.24	3.83	5.3	8.37	18.4
LOC108981660	9.36	10.08	9.37	8.38	7.3	6.89	18.32	10.01	12.88	14.82	13.51	14.22	9	12.6	12.9	13.23	15.85	13.25
LOC108981661	1.64	2.67	1.02	0.54	0.37	1.46	0.53	1.56	0.32	1.5	0.65	1.06	1.23	1.73	0.2	0.42	0.53	0.56
LOC108981662	0.69	0.48	0.88	0.47	1.69	1.49	0.94	0.93	0.86	1.07	0.37	0.65	0.43	1.12	0.55	1.44	0.5	0.34
LOC108981663	2.18	1.63	1.43	0.98	5.58	0.92	0.07	2.45	0.14	0.85	0.28	1.12	1.01	0.73	0.59	0	0	0
LOC108981666	0.1	0.3	0.29	0.1	0.42	0.2	0.92	0.71	0.41	0.54	0.67	0.09	0.47	0.65	0.1	0	0.1	0.2
LOC108981667	0.31	0.17	0.34	0.23	1.74	1.67	1.25	1.39	0.53	0.67	0.61	1.08	0.21	0.58	0.66	1.78	0.49	0.47
LOC108981670	0.56	0.5	1.06	0.59	0.53	0.44	0.42	0.26	0.32	0.52	0.31	0.32	0.33	0.24	0.49	0.67	0.81	0.35
LOC108981672	3.42	2.08	2.97	2.06	2.57	1.45	2.34	4.33	2.59	4.54	4.23	2.28	2.07	4.24	3.09	1.76	2.71	2.68
LOC108981673	3.51	4.64	2.5	7	8.11	5.35	9.52	5.19	3.74	5.24	5.4	5.2	6.53	6.12	10.89	2.23	5.35	5.96
LOC108981675	33.73	42.99	34.78	39.03	45.52	47.72	41.73	38.39	42.36	47.84	33.39	43.14	79.4	44.16	47.2	31.74	56.43	52.58
LOC108981677	17.26	17.11	21.32	20.96	20.35	18.01	15.7	16.61	17.69	24.53	21.43	22.37	18.96	20.75	18.22	13.32	23.14	20.17
LOC108981678	108.87	116.78	104.31	198.99	224.27	192.37	171.7	128.85	132.49	77.05	105.66	128.87	191.71	131.09	157.16	78.69	161.15	144.05
LOC108981679	13.7	12.52	11.63	8.19	15.06	6.51	42.82	15.7	19.32	17.74	15.9	14.35	19	15.27	22.75	17.75	15.61	20.97
LOC108981680	0.74	1.06	0.13	0.61	0.25	0.68	0.88	1.18	0.77	2.93	1.26	0.98	1.75	0.89	0.85	0.2	1.3	1.29
LOC108981681	0.76	1.46	0.8	0.33	0.14	0.72	0.67	0.87	0.14	1.03	0.65	0.31	0.53	0.42	0.65	0.24	0.88	1.05
LOC108981686	0	0	0	0.04	0	0.27	0.12	0	0.04	0	0	0	0	0	0.24	0	0	0
LOC108981687	0	0.03	0	0	0.03	0	0	0	0	0	0.37	0.06	0.06	0	0	0	0	0
LOC108981688	12.84	12.36	14.37	9.42	8.26	10.49	7.89	14.28	8.91	10.41	11.75	14.32	10.78	13.94	8.89	8.72	8.57	7.85
LOC108981694	21.65	18.6	20.21	26.66	23.39	21.33	20.87	19.2	20.94	24.47	30.46	24.39	9.91	17.02	22.67	18.54	23.32	22.33
LOC108981696	3.55	3.1	2.8	1.41	1.67	3.79	4.07	2.98	1.35	2.23	1.51	2.22	2.92	3.19	2.34	3.09	1.36	1.47
LOC108981703	10.25	10.75	10.62	16.06	11.1	10.52	13.32	12	11.07	23.61	24.72	20.04	10.19	12.49	12.54	11.08	17.79	16.51
LOC108981706	73.82	67.52	73.38	68.26	69.94	70	107.88	104.33	94.3	96.54	95.35	129.16	102.94	88.29	127.93	58.08	84.93	83.91
LOC108981709	21.97	31.07	25.81	16.31	14.76	21.15	15.72	26.09	14.43	19.2	18.31	16.08	40.86	25.24	12.11	29.25	18.4	20.2
LOC108981711	9.19	21.91	8.92	17.03	5.62	3.41	1.18	6.78	4.64	10.97	2.68	6.8	6.79	4.25	5.37	4.41	1.68	2.49
LOC108981712	0.03	0.13	0.07	0.17	0.06	0.04	0.33	0.01	0.26	0.02	0.11	0.21	0	0.24	0.41	0.55	0.07	0.11
LOC108981718	0	0	0	0	0.05	0.07	0.44	0.1	0.05	0	0.02	0.04	0	0	0.1	0.09	0	0.12
LOC108981720	5.5	1.4	5.64	8.55	13.94	6.53	3.49	5.51	11.49	11.49	3.73	5.44	6.24	8.55	10.53	2.1	6.57	3.27
LOC108981722	0	0	0	0	0	0	0	0	0	0	0	0	0	0	0.05	0	0	0
LOC108981724	0.16	0	0	0	0	0	0	0	0	0.17	0	0	0.15	0.07	0	0	0	0
LOC108981730	0.63	0.92	0.7	1.35	1.34	0.44	0.11	0.9	0.99	0.91	0.97	0.83	0.63	0.86	1.41	0.27	0.37	0.06
LOC108981736	0	0	0	0	0	0	0	0	0	0	0	0	0	0.07	0	0	0	0
LOC108981737	28.76	20.49	25.34	51.2	35.46	31.32	18.02	24.83	25.2	42.48	46.97	52.83	26.48	33.01	24.18	37.32	30.02	32.46
LOC108981741	8.12	6.48	8.34	11.4	16.16	11.54	5.18	5.37	4.64	8.44	5.13	7.73	5.36	5.81	5.39	3.95	8.13	5.8
LOC108981743	1.98	2.89	2.13	0.94	0.55	1.05	1.14	1.5	0.7	0.69	0.56	0.83	3.65	2.76	0.22	0.87	0.87	0.64
LOC108981744	0.05	0	0.1	0	0	0.05	1.29	0.03	0.13	0.03	0	0	0.05	0.02	0.4	0.38	0.29	0.9
LOC108981745	0.26	0.99	0.29	0	0.05	0	7.38	0.61	1.01	1.64	0.33	0.04	1.96	0.72	4.22	1.04	7.01	4.88
LOC108981746	13.22	15.77	9.92	28.02	13.96	17.31	13.6	13.65	19.8	27.04	18.5	30.5	10.64	14.12	13.87	8.94	22.9	18.98
LOC108981747	23.21	23.95	20.96	30.21	28.28	24.65	24.14	26.24	26.14	28.34	28.8	27.02	13.7	23.99	28.88	22.71	28.58	23.37
LOC108981748	3.89	3.39	3.4	2.34	2.17	1.88	1.5	4.31	2	5.42	4.04	3.53	4.12	4.14	1.89	1.67	1.45	1.66
LOC108981749	0.18	0.15	0.32	0.05	0.03	0.1	0.03	0.13	0.08	0.06	0.02	0.05	0.37	0.1	0.34	0.02	0.69	0.37
LOC108981750	0.03	0.08	0.05	0	0	0	0.03	0.19	0.17	0.42	0	0.03	0.13	0.03	0.28	0.45	1.58	0.5
LOC108981751	1.22	0.7	1.62	12.16	14.85	3.12	6.52	24.98	44.93	38.98	163.11	26.08	39.26	15.62	76.93	51.92	65.52	72.77
LOC108981752	2.05	5.81	2	2.05	1.66	2.47	8.87	10.23	6.55	8.8	4.02	3.3	13.21	7.1	5.91	2.97	4.98	6.44
LOC108981753	0.26	0.32	0.31	0.38	0.07	1.03	1.53	0.72	1.05	0.91	0.31	0.54	0.8	0.36	0.87	0.06	1.26	0.92
LOC108981754	0	0	0	0	0	0	0	0	0	0	0	0.27	0	0	0	0	0	0
LOC108981755	0.06	0.12	0	0	0.13	0.06	0.11	0	0.04	0.05	0.04	0.06	0	0.02	0.02	0.08	0.02	0
LOC108981756	3.96	5.43	3.82	1.9	1.63	3.51	1.32	2.19	1.5	2.99	1.9	2.97	3.47	3.55	0.64	2.47	1.43	2.57
LOC108981757	17.33	16.29	17.18	21.26	20.71	17.4	14.57	16.23	15.44	17.79	17.47	14.41	14.95	13.8	14.7	12.12	14.12	13.33
LOC108981758	84.91	97.94	86.03	82.95	90.84	84.78	87.23	90.04	87.88	84.77	79.39	94.79	163.27	112.56	90.83	87.91	79.52	108.52
LOC108981759	26.37	22.06	31.49	27.17	16.92	16.75	14.39	16.93	12.83	20.32	18.63	18.22	25.88	18.24	12.79	16.78	21.77	22.07
LOC108981760	0.71	1.42	0.86	0.47	1.68	0.36	0.49	0.96	1.63	1.61	1.56	1.87	1.07	0.72	3.12	0.17	0.67	0
LOC108981761	1.29	1.38	1.4	1.42	1.61	1.48	1.97	1.75	1.24	1.96	1.78	2.13	1.36	2.44	1.74	1.34	1.68	1.83
LOC108981764	0.14	0.11	0.18	0.65	3.02	2.55	0.19	0.19	0.15	1.11	1.31	0.54	0.59	0.55	0.38	0.42	0.79	1.27
LOC108981767	7.27	5.95	6.42	3.52	3.68	4.37	3.26	5.57	2.53	5.99	4.15	7.89	3.53	5.1	3.37	1.98	3.15	3.17
LOC108981769	0	0	0	0.09	0	0.04	0.21	0.02	0.09	0.24	0.04	0.02	0	0	0.07	0	0.14	0.39
LOC108981770	17.34	13.55	21.17	14.46	16.45	23.51	20.1	18.32	18.29	19.5	19.29	13.49	8.5	16.66	17.19	21.62	11.87	18.64
LOC108981771	8.85	11.43	8.4	24.64	26.22	22.42	13.93	9.04	16.91	7.93	11.33	9.62	6.48	9.76	15.35	10.66	13.99	13.32
LOC108981773	0	0	0	0	0	0	0	0	0	0	0	0	0	0	0.05	0	0	0
LOC108981774	0	0	0.06	0	0	0	0	0	0	0	0	0	0	0	0	0	0	0
LOC108981775	0.02	0.06	0.04	0.04	0.04	0	0.63	0.08	0.06	0.09	0.08	0.11	0.02	0.27	0.06	0.06	0.06	0.17
LOC108981778	1.18	1.6	0.91	3.45	1.37	3.43	5.81	1.43	4.65	6.05	3.74	4.64	1.99	3.1	5.03	2.24	9.69	6.79
LOC108981781	0	0	0	0	0.09	0	0.12	0	0.03	0	0	0	0	0	0.03	0	0	0
LOC108981789	7.49	6.65	8.19	9.4	6.72	7.05	6.09	6.82	6.38	7.52	8.15	7.19	4.66	7.7	5.2	5.28	5.41	5.83
LOC108981790	1.56	1.57	1.56	1.98	1.94	2.66	1.89	2.04	1.38	2.35	1.85	2.59	1.25	1.9	2.34	1.22	1.64	1.14
LOC108981791	133.49	138.49	89.91	12.96	69.55	199.48	179.09	174.93	52.48	185.71	178.4	238.98	75.27	194.7	106.84	202.81	87.35	68.66
LOC108981793	15.06	16.57	16.43	16.44	21.62	14.67	21.93	15.3	18.37	18.16	21.35	13.33	14.59	11.26	18.45	15.81	25.18	20.32
LOC108981795	15.49	13.54	19.6	33.55	33.39	51.76	33.81	34.34	46.65	22.98	17.96	15.87	26.56	28.28	54.42	32.11	35.64	26.4
LOC108981796	64.78	58.47	64.65	146.82	126.63	146.66	167.08	81.92	163.69	96.36	47.43	55.69	65.35	87.04	147.17	57.12	178.19	155.85
LOC108981797	167.16	154.2	157.92	343.82	374.51	273.91	298.44	164.83	274.66	177.37	178.73	178.8	212.81	187.89	303.8	178.62	279.89	285.75
LOC108981798	13.18	14.22	15.24	18.3	13.55	14.81	10.42	15.75	14.03	12.96	16.93	17.97	11.28	12.94	15.25	10.85	15.15	14.53
LOC108981799	104.71	92.1	90.09	13.54	67.84	258.44	234.55	210.77	111.76	228.35	266.7	251.96	75.96	220.68	128.68	270.4	113.46	99.84
LOC108981800	7.49	6.06	7.23	10.45	9.61	13.55	7.64	17.64	9.41	9.88	3.51	8.82	8.39	14.33	7.98	12.1	6.06	4.99
LOC108981803	313.04	375.04	391.52	298.73	240.14	189.86	205.14	377.89	276.5	329.66	382.06	353.87	425.35	373.5	266.71	238.55	335.5	358.13
LOC108981804	11.61	10.89	13.69	14.48	9.29	9.62	4.64	10.62	5.38	12.28	15.48	14.6	10.6	12.86	5.77	5.92	7.83	9.72
LOC108981807	14.21	9.25	11.83	17.58	12.37	10.84	9.2	13.76	9.83	17.51	11.35	14.23	10.05	7.04	11.03	8.83	14.33	16.56
LOC108981814	22.32	18.02	24.18	26.04	25.02	16.21	14.82	29.38	13.39	23.54	20.58	22.59	14.98	28.21	20.86	16.51	25.16	16.93
LOC108981816	3.42	1.76	4.2	3.04	4.99	3.75	6.38	5.22	3.36	6.06	6.13	3.93	3.61	3.7	4.62	7.03	3.04	4.26
LOC108981819	2.45	5.45	3.82	2.29	1.99	2.05	4.08	6.19	3.16	5.59	6.75	2.85	3.73	4.69	3.1	5.46	5.64	4.39
LOC108981822	39.4	25.38	40.76	55.98	53.65	73.34	63.88	87.24	63.26	79.35	85.96	54.71	34.5	46.43	47.83	99.72	56.17	58.41
LOC108981824	4.47	3.99	3.67	5.2	8.66	1.13	0.45	2.5	1.95	1.64	5.15	3.45	2.26	2.07	1.82	2.02	0.92	1.05
LOC108981827	16.38	21.84	16.29	22.88	25.51	19.35	26.02	20.99	23.11	15.75	17.59	14.78	14.35	17.12	26.92	15.76	21.92	21.34
LOC108981828	0.12	0.29	0.73	0.58	0	0.18	0	0.3	0	0.57	10.73	0.92	0.11	0.55	0.36	1.64	0.9	2.98
LOC108981830	36.75	28.45	31.06	25.51	24.13	24.07	18.65	29.96	17.51	24.07	28.34	30.52	28.53	32.28	18.29	19.98	18.43	21.41
LOC108981831	3.98	4.78	3.44	4.95	5.56	2.69	3.69	6.96	4.96	4.73	4.22	3.97	6.88	9.15	5.32	4.75	3.42	3.15
LOC108981832	0.56	0.07	0.51	0.16	0.17	0.63	0.14	0.47	0.2	0.68	0.06	0.52	0.22	0.31	0.27	0.1	0.03	0
LOC108981833	0.07	0.1	0.03	0.03	0	0	0.11	0.14	0.28	0.26	0.03	0.06	0.62	0.29	0.46	0.87	0.21	0.25
LOC108981834	26.79	27.07	28.86	23.88	21.78	20.38	39.19	44.71	40.5	38.17	44.65	31.11	33.5	38.89	31.97	34.61	30.72	27.59
LOC108981839	138.12	46.94	105.41	238.88	36.65	162.43	49.94	101.68	83.7	314.74	1186.1	362.27	92.47	86.13	27.34	216.4	124.45	430.17
LOC108981845	19.07	12.64	14.63	18.76	8.77	18.82	4.35	15.31	6.74	14.68	37.39	35.75	17.6	16.44	10.68	10.68	11.1	28.64
LOC108981850	0.27	0.19	0.22	3.89	1.9	6.06	6.05	1.02	5.86	15.32	14.08	2.54	3.37	2.05	2.83	6.84	7.79	9.68
LOC108981851	1.01	0.45	1.47	1.68	5.71	1.99	3.34	1.1	0.93	1.67	0.39	1	1.62	1.01	1.58	2.53	1.99	1.85
LOC108981852	3.62	3.72	4.43	4.72	6.37	4.66	5.05	4.18	4.74	4.63	7.29	5.54	2.41	3.85	6.17	4.86	4.03	3.5
LOC108981853	0.79	0.84	0.79	1.39	1.04	1.13	1.1	0.84	1.06	0.73	0.82	1.57	1.13	1.4	1.3	0.55	0.98	0.88
LOC108981854	1.39	1.24	1.87	1.88	1.34	1.74	2.82	1.93	3.46	2.16	1.77	1	2.59	1.58	2.05	2.84	3.84	2.45
LOC108981855	0.4	0.86	0.77	0.68	0	0.29	0	0	0.18	0.44	0.39	0.8	0.16	0.16	0	0	0	0
LOC108981856	11.75	13.08	11.21	17.86	19.18	13.18	18.48	12.83	15.01	16.29	13.89	13.29	13.3	12.76	22.79	13.44	16.86	15.64
LOC108981857	19.48	29.62	27.07	27.04	30.41	23.43	27.94	28.73	27.97	23.08	23.96	18.51	26.72	23.02	27.3	23.13	29.58	28.12
LOC108981858	0.11	0.2	0.12	0.17	0.86	0.25	0.23	0.22	0.21	0.14	0.04	0.2	0.32	0.37	0.26	0.26	0.25	0.15
LOC108981859	0.29	0.23	0.1	0.41	0.59	0.87	0.11	0.27	0.19	0.11	0.12	0.35	0.35	0.06	0.45	0.2	0.36	0.25
LOC108981860	32.09	28.57	32.31	31.45	28.72	26.26	31.28	32.86	32.35	26.72	31.83	28.97	22.52	29.45	32.32	25.83	29.63	28.66
LOC108981863	14.61	21.64	17.19	24.34	24.5	20.77	44.44	19.83	32.82	21.31	22.42	15.12	19.19	20.7	34.39	19.56	39.41	37.95
LOC108981873	2.59	2.45	2.29	5.38	3.78	1.15	0.16	0.55	1.25	1.75	1.71	10.05	4.15	6.67	0.55	0.89	0.87	0.39
LOC108981875	3.59	4.99	4.25	5.03	5.66	5.31	4.31	5.71	5.1	4.78	4.19	4.35	2.63	5.32	5.46	5.31	5.78	5.62
LOC108981877	2.16	2.26	0.7	1.43	2.57	1.18	1.41	1.01	1.39	1.48	0.88	2.44	0.95	1.87	1.22	1.85	3.18	2.5
LOC108981879	0	0	0	0	0.32	0.12	0.13	0.18	0	0	0	0.11	0	0	0.06	0	0	0
LOC108981885	14.28	10.34	14.75	22.06	21.28	21.08	9.83	8.76	10.22	12	14.27	16.81	7.1	9.5	12.57	8.05	10.64	9.1
LOC108981886	0.29	0.31	0.32	0.45	0.79	0.59	0.63	0.43	0.57	0.56	0.36	0.84	0.4	0.38	0.53	0.76	0.44	0.41
LOC108981887	0.78	0.32	0.47	1.31	0.96	1.04	0.33	0.82	0.24	0.55	0.52	0.87	0.87	0.85	0.61	0.3	0.37	0.31
LOC108981888	0.44	0.27	0.09	0.04	0.23	0	0	0.46	0.14	0.05	0	0.08	0.42	0.46	0	0	0	0
LOC108981889	106.42	106.63	104.65	86.28	96.84	73.63	74.76	84.36	71.14	78.71	57.99	106.97	201.6	147.31	71.88	79.03	63.27	86.03
LOC108981891	0.86	1.25	0.55	1.04	1.11	1.25	1.09	0.73	0.59	1.2	1.12	1.29	1.37	0.63	0.84	0.33	0.54	0.54
LOC108981892	4.13	3.94	4.87	8.67	9.02	9.53	6.27	4.15	7.47	5.89	6.33	3.09	9.13	6.88	7.88	7.18	9.46	11.44
LOC108981893	22.81	49.21	27.46	11.19	24.56	44.1	62.77	44.3	20.02	73.83	146.84	118.56	32.43	61.85	33.04	106.66	28.28	20.36
LOC108981895	34.9	41.76	37.09	28.85	33.63	33.12	35.85	41.58	36.67	52.59	43.29	54.13	108.52	58.63	35.79	35.07	34.71	49.99
LOC108981901	1.62	1.65	1.41	1.29	0.92	1.29	1.32	1.35	0.67	1.46	0.69	1.39	1.1	0.69	1.39	2.52	1.21	0.51
LOC108981904	35.73	42.18	38.86	33.37	31.29	22.73	32.29	41.85	35.33	41.11	38.06	42.61	48.77	46.75	38.62	20.57	35.77	35.36
LOC108981906	0.08	0.88	0.16	0.3	0.17	0.16	1.3	0.84	0.48	0.06	0.51	0.28	0.73	0.59	0.77	1.52	0.68	0.84
LOC108981907	0	0.12	0	0	0	0	0.25	0	0	0	0	0	0	0	0	0	0	0
LOC108981909	6.64	8.46	7.09	8.16	16.28	19.08	13.98	13.71	12.5	16.56	15.9	18.18	26.45	14.84	10.91	17.38	8.46	15.48
LOC108981914	8.26	6.11	8.85	5.83	5.13	7.38	3.53	7.9	3.14	7.88	9.1	9.56	3.91	6.24	3.18	5.16	3.79	4.49
LOC108981915	45.09	53.22	55.23	26.5	34.02	36.83	30.06	59.33	27.58	30.31	31.12	27.61	45.79	45.45	26.92	46.55	20.32	26.4
LOC108981916	0.84	1.15	0.93	1.08	0.69	1.73	1.32	1.07	0.84	0.65	0.52	0.32	0.53	0.77	0.47	1.66	1.02	0.29
LOC108981918	15.03	19.04	16.18	9.58	7.39	7.27	10.79	20.6	10.69	13.22	14.82	12.8	18.61	19.35	9.07	10.83	13.49	12.68
LOC108981924	22.78	22.98	20.53	114.66	115.14	100.33	152.05	265.3	213.37	118.36	44.79	96.07	277.04	203.06	147.44	156.7	217.98	167.91
LOC108981927	9.31	9.82	9.82	9.17	8.69	8.18	5.27	8.84	5.11	7.14	6.5	9.47	6.61	7.81	6.06	5.42	4.38	5.09
LOC108981928	23.07	8.83	16.66	16.62	12.28	6.29	8.4	18.58	8.52	10.51	11.59	30.74	21.27	17.64	13.56	4.47	6.26	7.25
LOC108981929	0	0	0	0	0	0.06	0.11	0	0	0	0.16	0	0.11	0.1	0.06	0	0.11	0.28
LOC108981930	0.22	0	0.11	0.11	0.58	0.77	1.36	0	0.67	0.96	0.11	0	0	0	0.34	0.96	0	0
LOC108981936	0.59	0.7	0.54	0.77	0.97	0.62	1.64	0.8	0.63	0.99	0.94	0.82	0.86	0.58	1.38	0.8	0.91	0.92
LOC108981938	10.2	14.14	11.07	30.73	29.8	34.94	14.32	13.26	16.53	13.95	9.94	17	11.95	15.43	20.95	12.11	17.91	15.73
LOC108981939	12.26	13.43	13.27	24.84	29.11	30.03	25.86	16.51	24.76	22.59	27.68	15.94	16.54	17.92	34.46	19.99	24.46	25.61
LOC108981940	8.83	9.5	9.25	8.03	6.78	6.89	23.83	9.76	14.23	24.73	13.22	11.9	5.26	10.65	19.59	6.62	28.28	21.16
LOC108981941	8.08	8.38	8.36	7.79	8.43	7.75	9.44	9.05	8.89	9.71	9.86	10.44	9.52	10.27	8.75	10.55	8.98	8.18
LOC108981942	18.28	27.03	19.34	30.37	28.71	21.59	51.47	27.7	47.62	42.84	39.78	33.75	20.56	26.05	48.92	28.78	52.9	41.94
LOC108981943	0.83	0.79	0.82	1	0.9	1.04	0.67	0.92	0.61	0.71	0.82	0.77	0.51	0.82	0.57	0.63	0.99	0.91
LOC108981944	41.12	24.11	39.69	14.91	34.15	8.14	3.27	14.89	12.92	17.06	12.79	22.12	29.98	26.41	9.66	6.46	8.5	2.22
LOC108981945	17.48	18.38	16.7	30.33	25.78	21.6	24.29	18.58	29.48	21.82	23.5	17.71	13.42	15.47	26.69	25.93	23.07	23.3
LOC108981946	63.57	56.87	60.98	61.53	67.01	53.6	62.17	47.74	64.19	53.45	59.48	61.54	76.32	63.23	62.66	43.85	53.9	59.23
LOC108981947	11.47	9.03	17.38	22.05	20.57	24.21	30.89	15.51	27.03	17.34	15.55	14.63	12.19	15.16	28.12	17.01	18.93	27.15
LOC108981948	14.04	9.14	14.43	8.06	10.02	4.66	16.25	7.11	9.46	5.39	8.94	5.42	8.41	6.97	21.38	15.14	5.59	13.26
LOC108981949	11.16	12.71	10.55	9.12	13.44	6.97	19.81	17.26	13.97	16.78	14.68	13.28	21.87	15.74	15.08	16.75	12.37	13.08
LOC108981952	0	0	0.15	0.03	0.06	0.03	0	0	0.06	0.07	0.03	0	0.03	0	0	0.06	0	0
LOC108981953	0.01	0	0.04	0	0.02	0.01	0	0	0	0.06	0.1	0.11	0.01	0	0	0	0	0
LOC108981954	0.06	0.04	0.02	0	0	0.02	0	0	0.04	0.02	0.2	0.07	0	0	0.06	0	0	0
LOC108981955	1.58	0.16	0.67	1.58	2.57	0.91	0.77	0.87	1.85	1.86	8.07	0.99	1.87	0.1	2.15	4.13	0.11	1.3
LOC108981956	116.74	113.18	114.92	119.14	103.21	114.23	126.52	132.12	141.74	134.52	159.18	148.52	284	159.49	132.23	133.69	146.09	199.62
LOC108981957	11.44	12.24	12.8	10.87	9.36	11.53	8.01	9.43	9.18	9.59	11.76	11.89	5.72	9.23	9.27	10.03	8.33	8.63
LOC108981958	2.1	2.07	1.93	4.47	9.63	3.3	6.31	2.17	5.24	4.34	1.78	3.07	2.74	3.12	9.09	2.67	7.36	6.53
LOC108981959	28.42	35.26	33.53	26.59	28.65	24.32	35.95	44.84	37.41	42.3	41.77	42.34	65.03	45.56	43.05	36.71	29.64	32.1
LOC108981960	3.88	3.1	3.69	6.19	6.38	7.8	5.68	5.53	7.45	7.43	5.39	8.15	4.39	5.03	5.56	4.03	6.49	6.92
LOC108981962	0	0	0.19	0.07	0	0	0	0	0	0	0	0.06	0	0.06	0	0	0	0
LOC108981965	0.58	0.73	0.41	0.72	0.32	0.73	1.15	0.77	0.46	0.63	1.01	0.82	0.62	0.5	0.57	0.56	0.55	0.59
LOC108981971	0.36	0.73	0.74	1.27	2.62	0.77	1.18	1.12	0.86	1.44	0.89	1.19	1.19	0.41	1.86	1	1.1	0.94
LOC108981972	6.62	6.47	5.75	5.78	4.28	7.19	10.9	11.09	7.57	7.05	4.08	6.13	12.52	10.9	9.77	11.34	10.4	10.17
LOC108981974	0.1	0	0	0	0	0	0	0	0	0	0.09	0	0	0	0	0	0.05	0.05
LOC108981975	0	0	0.05	0	0.05	0	0.11	0	0	0.39	0.05	0.1	0.24	0.05	0.05	0.1	0.05	0.05
LOC108981981	36.8	31.87	35.8	55.88	62.24	46.57	28.24	23.11	26.12	26.66	34.01	32.49	17.05	26.54	33.89	25.38	37.47	34.15
LOC108981985	23.9	23.54	40.96	40.16	43.48	67.71	57.32	36.5	59.65	30.62	22.68	30.41	22.59	41.31	83.44	50.92	45.17	57.82
LOC108981986	8.75	10.07	8.37	10.39	10.8	8.35	7.05	11.57	8.6	8.18	7.68	8.84	12.87	12.22	9.97	6.15	10.4	8.96
LOC108981988	13.84	17.89	19.02	14.56	8.9	16.62	8.53	13.99	7.85	10.98	8.13	11.54	9.64	13.96	7.08	8.02	10.43	7.35
LOC108981991	4.62	6.47	3.26	5.39	3.2	6.11	10.71	4.87	7.76	9.25	6.1	6.8	15.27	9.1	8.85	4.11	11.31	12.55
LOC108981996	9.45	9.03	9.36	7.53	9.42	9.16	5.31	9.93	5.53	9.86	15.88	11.46	10.02	12.21	4.35	9.97	3.91	6.06
LOC108981998	1.67	0.8	2.18	0.79	1.18	1.3	3.85	1.49	1.33	1.46	2.67	1.29	0.63	1.05	0.95	1.01	0.7	1.51
LOC108981999	9.05	4.11	15.42	11.98	11.99	27.73	9.54	14.12	14.73	11.44	11.82	6.28	6.13	8.68	20.23	21.81	8.82	9.39
LOC108982000	29.85	25.16	30.02	24.49	31.78	29.52	27.58	18.4	24.48	19.73	22.48	16.07	12.75	16.61	26.27	28.98	21.49	22.6
LOC108982002	0	2.85	0	0	0	0.04	2.15	0	0	0	0	0	0	0	0	0.04	0	0
LOC108982003	0.27	0.16	0.62	0.26	0.62	0.75	0.66	2.5	0.77	1.81	2.29	1.29	1.88	2.5	0.28	0.31	0.22	0.98
LOC108982005	0.47	0.7	0.79	0.41	0.8	0.57	0.59	0.87	0.42	0.59	0.58	0.71	0.45	0.83	0.65	0.8	0.36	0.52
LOC108982006	0	0	0	0	0.04	0	0	0	0	0	0.03	0	0	0	0	0	0	0.04
LOC108982009	0	0	0	0	0	0	0	0	0	0	0	0	0	0	0	0.05	0	0
LOC108982010	0.05	0.19	0	0	0.06	0.11	0.17	0.06	0.06	0.27	0.05	0.13	0.24	0.26	0.28	0.43	0.28	0.08
LOC108982011	0	0	0	0	0	0	0.14	0	0	0	0	0	0	0	0	0	0	0
LOC108982012	1.44	1.45	2.75	6.42	12.31	17.22	2.14	2.94	1.76	6.94	2.01	1.56	6.17	1.1	29.26	21.02	22.96	10.82
LOC108982013	1.82	1.27	2.03	2.55	3.59	3.48	0.92	2.48	1.49	2.04	1.46	3.49	5.35	2.41	3.88	1.41	1.6	2.92
LOC108982015	23.66	15.99	19.69	12.95	12.87	10.22	18.81	14.6	14.91	26.71	22.23	23.71	21.73	18.67	13.35	12.81	11.62	12.08
LOC108982016	14.27	16.61	17.54	19.51	12.92	15.33	23.03	15.13	18.09	18.28	22.29	15.5	19.72	14.52	18.53	18.93	17.04	23.87
LOC108982017	3.3	2.11	2.82	2.38	3.93	1.19	2.37	3.03	2.9	3.36	1.73	2.83	4.14	2.18	3.78	1.2	1.96	0.85
LOC108982018	5.54	9.16	9.16	10.62	7.6	9.9	9.34	11.06	7.01	9.42	6.09	10.19	9.76	9.77	6.87	4.09	7.87	5.31
LOC108982019	2.59	2.19	2.55	1.19	1.78	0.75	12.1	2.82	2.96	8.15	1.29	3.23	5.54	6	7.65	1.28	25.74	34.47
LOC108982020	234.29	107.92	228.44	172.88	160.94	185.19	65.21	167.41	102.48	101.93	158.28	120.57	106.17	103.67	98.44	136.36	75.54	97.87
LOC108982021	4.74	4.66	4.2	5.83	6.82	5.58	4.03	2.39	3.5	2.95	3.24	2.68	2.65	2.77	5.52	3.7	2.8	2.94
LOC108982022	12.14	13	11.82	11.43	12.79	15.59	10.56	14.2	11.94	13.55	11.74	14.12	18.52	16.75	13.92	8.6	9.63	10.92
LOC108982023	7.96	6.72	9.8	12.32	10.47	10.64	10.09	9.05	8.07	12.73	12.71	10.58	7.63	7.39	9.9	9.71	10.49	8.77
LOC108982025	0.85	1.08	1.6	2.46	2.21	1.6	5.16	0.92	1.7	2.58	1.99	1.43	0.91	1.07	2.86	0.87	4.01	1.53
LOC108982026	27.28	23.51	23.34	30.24	21.87	28.12	15.03	23.07	15.82	25.78	26.93	34.24	20.11	22.68	17.14	13.74	15.08	19.26
LOC108982027	14.57	18.62	16.63	24.77	22.28	18.75	26.64	24.39	22.63	21.38	19.37	16.63	11.91	16.16	22.9	27.26	23.17	19.97
LOC108982028	23.46	24.26	30.53	17.53	54.5	69.82	100.69	69.85	75.52	35.15	30.99	55.54	35.53	67.93	139.01	160.01	58.57	61.25
LOC108982029	1.75	2	1.95	2.33	3.02	1.37	5.4	1.71	2.58	2.32	0.97	1.64	2.81	1.91	6.55	1.35	2.99	3.51
LOC108982030	0	0.04	0.04	0	0.09	0	0	0	0	0	0	0.23	0	0	0	0.04	0	0
LOC108982031	53.76	62.12	52.54	67.63	51.22	56.48	64.55	66.5	68.25	63.15	57.58	62.62	63.48	68.53	64.61	70.65	64.22	81.06
LOC108982032	28.7	28.85	25.5	22.59	18.48	19.79	16.06	28.28	18.98	25.24	26.63	27.29	29.62	26.4	17.89	19.54	21.72	19.66
LOC108982034	4.05	2.74	4.56	5.43	8.03	9.32	8.36	5.55	8.32	7.76	9.3	5.27	3.88	6.25	14.67	4.59	10.03	10.4
LOC108982040	0	0	0	0	0.03	0	0.03	0	0.03	0	0.14	0.05	0	0.03	0	0	0	0
LOC108982042	19.63	18.51	18.36	18.54	19.08	17.3	14.93	18.08	13.61	17	14.73	18.76	13.33	18.37	13.99	11.03	14.66	13.19
LOC108982043	9.92	12.24	10.82	6.89	4.19	10.9	5.57	7.6	4.2	10.06	8.45	8.8	6.89	9.88	3.48	6.78	6.12	5.94
LOC108982044	13.28	29.25	12	11.41	11.2	12.11	10.23	12.9	12	7.21	7.81	9.94	8.12	10.46	10.21	15.31	11.25	8.88
LOC108982045	0.43	0.57	0.59	0.43	0.71	0.28	0.18	0.54	0.26	0.58	1.31	0.79	1.52	1.13	0.37	0.83	0.31	0.42
LOC108982048	21.13	21.41	22.94	19.26	18.42	18.77	16.13	19.85	13.98	15.56	18.38	16.44	19.79	16.98	14.37	16.46	12.77	15.11
LOC108982049	3.3	3.62	3.83	2.28	2.53	2.96	1.59	3.26	1.24	1.87	2.2	3.44	1.86	2.3	1.85	1.57	0.9	1.45
LOC108982051	0.08	0.04	0.08	0.12	0.7	0.46	0.27	0.23	0.16	0.26	0.04	0.28	0.17	1	0.38	0.25	0.42	0.8
LOC108982052	5.53	5.21	3.03	10.07	6.11	6.61	21.59	9.88	22.03	21.9	13.29	9.13	8.75	9.22	24.4	15.14	31.95	22.68
LOC108982053	13.64	12.34	15.61	23.62	30.01	23.85	25.41	17.9	21.65	18.52	22.81	17.77	29.55	17.21	25.71	16.95	13.64	21.95
LOC108982054	0.25	0.05	0.05	0.03	0.06	0	0.11	0	0.06	0.12	0.24	0.08	0.03	0.03	0.06	0.03	0	0
LOC108982055	21.03	16.12	22.08	18.62	15.8	19.14	10.8	18.13	11.13	14.83	16.7	17.11	10.23	16.46	10.94	13.01	12.23	13.41
LOC108982056	45.14	28.4	49.06	32.86	47.61	65.77	14.51	31.23	17.78	18.14	19.01	25.27	28.19	35.25	18.82	31.65	16.64	24.96
LOC108982057	0.21	0.25	0.41	2.31	3.52	4.09	5.98	0.78	1.48	4.35	1.61	0.32	2.87	3.78	5.93	4.12	10.44	16.19
LOC108982058	1.67	1.36	1.64	2.02	1.34	2.84	4.51	3.08	3.91	2.41	2.84	2.43	1.8	2.1	4.26	2.8	3.85	2.82
LOC108982059	54.56	51.06	52.24	96.26	103.57	80.83	68.81	45.31	62.06	53.27	60.6	55.83	53.02	48.07	73.28	41.34	67.11	64.21
LOC108982060	11.41	14.77	10.33	15.59	15.61	11.35	24.14	20.64	23.22	27.59	20.73	17.27	19.03	14.5	21.57	14.74	32.8	22.95
LOC108982063	40.96	18.53	32.98	25.69	25.19	13.47	10.35	18.28	15.72	16.85	17.74	15.11	15.16	14.78	15.36	30.29	21.55	12.15
LOC108982064	1.54	1.45	2	1.38	1.47	1.04	1.87	2.32	1.06	1.41	1.56	1.83	1.92	1.84	2.2	1.36	1.82	1.69
LOC108982066	8.63	19.42	5.64	7.54	5.59	2.19	0.96	10.85	1.74	6.41	0.94	6.82	8.69	10.59	2.64	0.47	3.09	1.32
LOC108982068	22.5	11.31	17.12	21.33	9.43	13.02	8.18	15.57	8.63	22.55	42.4	21.54	7.76	10.27	7.11	20.06	8.53	13.4
LOC108982072	37.23	40.71	35.87	45.16	52.43	50.43	39.34	37.65	39.45	39.09	37.35	40.78	36.78	42.48	43.68	35.45	38.24	41.76
LOC108982074	26.37	8.73	32.69	20.08	73.62	21.56	28.39	56.22	24.15	25.72	22.16	33.3	49.42	37.26	27.4	30.18	21.65	28.38
LOC108982076	6.59	10.66	11.44	2.38	1.78	8.07	2.63	8.05	1.23	7.85	4.81	5.26	15.91	10.97	0.73	2.26	1.02	2.89
LOC108982077	1.21	0.86	1.77	3.02	27.81	12.33	3.79	7.4	8.94	9.86	0.79	4.35	1.98	2.14	11.99	0.59	4.62	3.17
LOC108982082	0	0	0	0	0	0.11	0	0	0	0	0	0	0	0	0	0	0	0
LOC108982083	12.4	9.22	12.52	13.7	12.47	11.85	7.84	8.96	8.61	10.83	10.16	10.04	6.01	9.13	8.92	7.59	10.1	8.05
LOC108982084	12.25	9.71	12.87	7.67	6.15	10.5	3.12	8.77	2.96	6.77	7.05	9.34	5.91	6.65	1.75	7.73	2.87	3.51
LOC108982085	13.07	14.88	13.86	8.69	7.46	10.15	17.19	17.85	14.69	20.24	16.18	13.65	13.32	19.78	14.8	11.89	11.51	12.04
LOC108982086	0.11	3.5	0.05	0	0.47	0	0.12	0.52	0.06	0.18	0	0	0.16	0.11	1.52	0.66	0.58	0
LOC108982087	1.7	2.34	1.76	2.04	2.3	1.75	2.59	2.59	2.69	1.61	2.04	2.23	1.35	1.81	2.86	2.04	2	1.69
LOC108982088	0.31	0.82	0.65	0.21	0.63	0.12	0.82	1.52	0.15	0.45	0.51	0.78	0.92	0.52	0.77	0.96	0.65	0.76
LOC108982089	0.21	0	0.28	0.21	0.15	0.14	0.07	0.22	0.44	0.08	0.28	0.33	0.75	0.61	0.07	0	0.37	0.07
LOC108982090	1.21	0.96	1.23	1.25	0.87	1.54	1.36	1.59	0.95	0.87	1.36	1.84	2	1.71	0.95	1.07	0.99	0.72
LOC108982092	0	0	0.05	0.28	0.35	0.19	0.63	0.24	0.38	0.26	0	0	0.18	0.44	0.1	0.41	0.39	0.43
LOC108982093	79.88	70.84	79.2	40.4	18.29	59.87	8.93	35.03	17.58	41.45	96.52	81.34	72.25	46.55	8.57	35.91	15.18	37.08
LOC108982094	0.28	0.09	0.23	0.05	0.15	0	0	0.05	0.05	0	0.27	0.17	0.8	0.26	0	0	0.15	0.14
LOC108982096	70.22	88.04	69.86	41.73	26.69	35.65	33.64	112.67	41.3	93.73	97.26	125.3	75.31	116.52	40.66	58.9	43.97	46.99
LOC108982097	35.05	33.79	35.2	32.35	21.36	23.2	22.95	25.07	13.77	35.97	46.18	52.17	28.21	38.48	18.34	15.13	17.52	17.95
LOC108982098	0	0.02	0	0.05	0.08	0.03	0.05	0	0	0	0	0	0.02	0	0.18	0.05	0	0
LOC108982099	355.24	391.41	295.09	195.57	60.44	147.84	37.09	57.61	118.95	95.16	95.06	204.52	83.78	72.03	20.44	41.97	40.6	137.19
LOC108982100	32.6	44.79	46.82	11.28	6.79	45.43	8.21	15.97	6.04	30.87	13.06	15.11	13.79	25.9	1.76	10.15	6.65	7.28
LOC108982101	0.45	0.23	0.6	0.79	0.6	0.46	0.44	0.81	0.25	0.57	1.08	0.82	0.17	0.61	0.47	0.36	0.4	0.3
LOC108982102	12.52	17.62	17.34	13.48	15.95	11.01	16.24	18.41	12.94	19.48	19.85	20.36	22.92	20.9	14.98	17.16	12.97	17.95
LOC108982103	91.34	41.95	70.53	43.31	27.76	53.33	5.81	23.51	4.51	4.05	12.97	7.65	91.92	19.74	1.39	53	12.23	74.86
LOC108982104	53.05	58.57	59.18	23.71	27.52	18.52	21.39	45.5	24.76	26.57	46.48	31.81	63.12	51.51	24.61	56.86	30.43	42.76
LOC108982106	7.17	3.97	5.82	7.29	7.74	8.53	5.45	6.73	8.51	6.99	9.43	5.47	7.62	5.54	10.82	7.93	4.69	5.97
LOC108982107	0.26	0.33	0.3	0.65	1.35	0.64	3.98	0.28	0.57	1.58	0.58	0.12	0.52	0.55	2.72	1.09	3.6	2.59
LOC108982108	0.27	0.21	0.26	0.18	1.01	0.06	0.68	1.38	0.89	0.72	1.17	0.31	1	0.42	1.03	1.55	0.59	0.31
LOC108982110	0.04	0.33	0.57	0.83	1.52	2.65	9.9	1.81	4.58	0.79	0.82	0.95	0.04	0.68	7.65	3.9	3.44	1.84
LOC108982111	3.17	4.03	2.32	2	2.24	1.91	3.65	2.17	2.18	2.69	3.1	2.24	3.62	1.99	2.72	1.69	1.56	2.23
LOC108982112	15.26	9.71	14.1	10.08	8.43	3.91	3.54	7.89	6.93	9.67	10.32	10.22	5.51	7.74	3.61	1.94	5.08	4.04
LOC108982113	0.61	0.2	0.89	0.57	0.35	0.27	0.55	0.67	0.56	0.36	0.86	1.19	0.63	1.03	0.14	0.45	0.64	0.25
LOC108982114	34.57	30.5	38.78	28.7	23.16	22.41	42.09	33.84	25.74	35.09	35.32	22.71	26.32	29.45	26.71	28.46	26.01	28.81
LOC108982116	2.64	6.08	3.29	5.03	4.19	5.54	9.79	7.33	5.96	2.37	2.44	3.24	7.24	5.86	8.32	9.04	5.74	4.14
LOC108982117	149.78	93.78	130.36	94.5	76.25	97.79	48.85	79.29	61.43	84.92	97.04	104.4	91.49	95.92	58.75	74.5	69.51	82.37
LOC108982118	1.96	3.2	1.88	1.34	2.66	1.43	3.13	2.23	2.49	1.66	1.84	1.86	1.41	1.36	2.45	2.99	1.4	1.59
LOC108982119	8.98	7.78	9.23	8.15	9.55	8.44	7.5	6.98	6.8	5.63	6.78	6.42	5.85	6.6	8.29	6.97	6.22	7.1
LOC108982120	82.16	71.05	80.19	92.38	75.55	48.39	168.48	76.19	130.96	67.62	103.82	45.91	46.91	55.75	124.27	103.04	48.53	64.96
LOC108982123	0	0	0	0.16	0	0	0	0	0	0	0	0	0	0	0	0	0	0
LOC108982126	0.91	0.67	1.05	1.21	1.75	1.49	1.59	1.51	0.82	1.35	1.66	2.1	1.65	1.95	1.67	0.81	0.69	0.51
LOC108982127	0.18	0.32	0.42	0.36	0.11	0.22	0.19	0.37	0.15	0.67	0.14	0.2	0.03	0.34	0.04	0.14	0.04	0.04
LOC108982128	0	0	0	0	0	0	0	0.06	0	0	0	0	0.06	0.03	0	0	0	0
LOC108982129	77.51	91.4	75.96	159.07	206.02	143.61	159.34	76.73	117.47	59.99	79.22	86.16	130.74	90.61	157.22	80.37	107.76	119.36
LOC108982131	0.46	0.99	0.74	0.31	0.78	1.93	0.37	0.54	0.38	0.21	0.06	0.67	0.06	0.4	0.09	0.37	0.12	0.02
LOC108982132	3.53	2.89	4.82	1.73	1.07	1.75	9.4	4.29	2.34	8.27	6.91	4.26	6.47	3.44	3.11	4.44	2.86	3.94
LOC108982133	0	0	0	0.15	0.1	0.09	0.26	0.25	1.97	0.27	0.57	0.03	0.32	0.44	2.28	1.18	0.55	0.03
LOC108982134	1.98	0.84	1.88	0.78	0.83	0.11	0.49	1.23	0.7	0.63	0.61	2.4	0.75	1.13	0.05	0.1	0.6	0.16
LOC108982135	0	0	0	0	0	0	0.03	0	0	0.03	0	0	0	0	0	0	0.03	0.03
LOC108982136	0	0.12	0.05	0.09	0.15	0.12	0.05	0	0.02	0.13	0.12	0.07	0.39	0.02	0.1	0.05	0	0.1
LOC108982137	120.29	71.28	107.49	54.59	42.74	51.65	29.76	103.17	33.57	61.76	52.15	82.38	92.68	121.1	29.82	39.23	40.9	36.81
LOC108982140	1.13	0.86	0.47	0.8	1.02	0.22	0.06	1.37	0.44	0.47	0.37	0.9	1.23	1.21	0.39	0.26	0.5	0.28
LOC108982143	42.49	48.2	38.41	14.44	11.33	13.71	3.11	18.59	3.38	1.95	2.83	2.93	18.47	16.69	3.5	4.2	3.33	3.37
LOC108982144	0.96	2.36	1.48	3.55	8.16	3.28	5.5	3.97	6.34	5.12	5.34	1.61	3.33	2.32	7.39	12.65	6.49	3.92
LOC108982145	0.94	2.34	1.65	0.8	0.85	1.44	1.91	1.56	1.29	2.6	1.53	1.17	1.41	1.52	0.88	0.17	0.42	0.74
LOC108982146	4.94	5.27	5.15	5.51	6.54	6.39	5.78	5.54	4.23	3.98	4.38	4.86	7.22	5.75	5.76	3.25	3.77	4.36
LOC108982148	0.02	0.15	0.1	0.06	0.09	0.06	0.02	0.09	0.02	0.02	0.08	0.08	0.04	0.02	0.02	0.08	0.04	0
LOC108982152	19.67	22.31	18.99	21.42	22.09	20.85	14.45	22.2	18.42	16.65	17.54	19.51	12.2	16.19	19.4	18.75	14.92	13.24
LOC108982153	0	0	0	0	0.15	0	0	0	0	0	0	0	0	0	0	0	0	0
LOC108982154	2.81	2.57	3.23	6.77	8.23	1.16	0.68	6.94	1.74	1.26	1.44	1.64	2.11	2.02	2.7	0.42	3.24	2.09
LOC108982155	1	1.44	1.85	1.33	2.36	1.58	0.79	1.46	0.29	1.36	0.7	0.8	2.09	0.76	0.94	0.98	0.99	0.73
LOC108982156	32.42	40.6	37.53	26.14	25.15	20.62	26.96	41.49	28.85	30.38	30.51	31.59	31.44	35.56	28.27	31.68	31.05	28.01
LOC108982159	0.35	0.44	0.5	0.2	0.08	0.32	0.16	0.36	0.04	0.56	0.42	0.63	0.11	0.63	0.08	0	0.16	0.32
LOC108982160	0	0	0	0	0	0.03	0.03	0	0	0	0	0	0	0	0	0.06	0.03	0
LOC108982164	0	0	0.04	0.13	0.07	0.06	0.04	0.04	0.06	0	0.02	0	0.02	0.04	0.09	0.02	0.04	0.04
LOC108982165	2.28	3.38	2.56	6.01	4.69	2.76	11.71	2.91	4.31	7.69	4.2	2.49	3.59	3.38	10.28	5.51	8.28	9.56
LOC108982166	0.67	0.34	0.49	0.84	0.3	0.48	0.15	0.69	0.52	0.55	0.55	0.79	1.07	0.95	0.61	0.38	0.9	0.52
LOC108982168	2.8	3.26	4.16	6.18	4.43	2.42	1.5	4.93	2.61	4.22	4.28	6.63	6.32	5.35	1.5	0.73	2.27	2.88
LOC108982171	2.72	3.63	3.75	4.01	3.43	3.57	2.4	3.53	2.5	3.1	3.49	2.64	3.39	2.69	2.06	2.51	2.93	3.37
LOC108982172	1.95	1.78	1.86	2	2.86	1.87	1.61	1.93	1.19	2.34	1.58	2.51	3.03	1.15	1.87	1.34	2.37	1.91
LOC108982174	12.44	14.35	10.19	11.22	6.03	10.54	8.21	16.3	8.55	25.02	28.73	45.39	14.09	22.45	7.89	4.72	13.17	9.77
LOC108982177	7.32	5.09	6.95	15.63	14.13	14.79	18.86	9.74	24.19	10.54	11.17	7.63	6.34	7.79	18.68	15.11	11.01	11.08
LOC108982178	17.84	15.23	18.18	21.14	19.52	16.56	19.06	19.82	16.46	22.18	18.9	20.15	19.34	18.8	19.43	19.82	18.65	17.99
LOC108982179	60.38	45.69	48.18	48.2	26.59	46.12	63.73	56.77	44.86	146.08	266.57	83.09	62.21	83.26	35.93	79.45	61.62	61.19
LOC108982180	0.42	1.79	0.97	0.18	0.86	0.95	0.79	1.34	0.83	1.12	0.28	0.54	0.4	0.76	0.3	1.07	0.22	0.11
LOC108982181	2.36	5.18	3.07	2.73	5	0.04	0.35	3.5	2.78	1.48	1.61	4.63	3.39	4.06	1.8	0.74	0.57	0.82
LOC108982182	0.19	0.38	0.18	0.27	0.37	0.11	0.06	0.38	0.33	1.87	0.34	0.25	2.12	1.96	3.92	2.27	6.88	6.7
LOC108982185	42.38	44.87	41.98	69.5	68.19	60.46	58.64	43.24	44.77	39.07	44.79	51.51	71.98	48.45	55.23	38.98	47.56	64.98
LOC108982186	0.16	0.53	0.21	0.24	0.28	0.05	0.5	0.43	0.46	7.71	0.62	0.3	3.82	3.61	15.36	6.82	17.72	17.16
LOC108982188	0	0	0.09	0	0	0	0	0	0.1	0	0	0	0	0	0	0	0	0
LOC108982189	0.14	0	0	1.26	3.05	4	0.56	0.14	1.81	1.83	1.06	0.08	0	0	0.94	0.35	0.75	0.28
LOC108982192	0	0.1	0	0.03	0	0	0	0.04	0.25	0	0.03	0.1	0	0	0.32	0	0.07	0
LOC108982194	0	0.04	0	0	0	0	0	0	0	0	0	0	0	0	0	0	0	0
LOC108982197	0	0.09	0.3	0.36	0.19	0.68	0.28	0.23	0.05	0.84	0.13	0.8	1.12	1.69	5.56	0.96	4.19	5.81
LOC108982198	0	0	0	0	0	0	1.46	0	0.36	0.14	0.09	0	0	0	0	0	0.07	0
LOC108982200	3.8	3.01	3.22	2.95	3.74	2.88	3.16	4.33	3.59	3.86	3.04	5.34	3.07	3.95	4.37	1.19	2.92	2.36
LOC108982201	0.4	1.6	1.01	0.93	0.47	1.62	5.29	1.63	2.22	3.21	2.7	2.28	0.77	3.17	2.14	5.26	3.26	2.85
LOC108982202	0.2	0.25	0.02	0.02	0.07	0	0.02	0	0.07	0	0.13	0.11	0.02	0.04	0	0	0	0
LOC108982204	1827.08	1561.91	2070.53	614.92	397.01	407.51	54.12	741.24	353.97	425.85	1163.02	738.31	685.95	1195.84	175.01	475.16	583.84	1443.47
LOC108982205	0.26	0.41	0.25	0.46	0.5	0.04	1.12	0.42	0.27	0.87	0.32	0.23	0.15	0.51	2.05	0.46	3.08	2.77
LOC108982206	5.31	4.82	4.12	3.27	2.17	2.17	2.59	5.25	2.95	3.89	3.6	4.89	3.51	5.4	2.92	1.15	2.26	0.95
LOC108982207	9.32	10.89	9.11	11.13	10.47	9.18	8.96	11.48	8.6	9.23	9.51	10.8	11.25	10.14	9.11	7.23	7.57	9.65
LOC108982208	9.63	11.19	20.05	2.35	19.94	61.69	30.37	39.67	14.49	17.78	16.57	35.89	10.99	40.18	20.34	52.06	25.28	28.13
LOC108982211	0	0	0.04	0	0.1	0.06	0.14	0.02	0.08	0.02	0	0.02	0	0.02	0.02	0	0	0.04
LOC108982213	18.59	10.85	15.73	8.35	6.96	10.02	6.31	7.42	4.91	8.32	10.37	11.19	7.65	9.6	4.28	6.78	5.38	9.16
LOC108982214	21.42	23.23	20.35	42.57	53.94	44.36	23.67	20.32	24.53	20.32	18.79	24.36	22.91	25.48	33.45	22.42	23.57	26.13
LOC108982215	29.43	26.56	27.63	34.28	27.43	31.79	26.62	27.59	23.96	27.07	38.58	33.82	17.03	24.27	22.67	24.91	24.24	24.26
LOC108982217	0	0	0	0	0	0	0.03	0.03	0	0	0.16	0	0	0.05	0	0.08	0	0
LOC108982218	13.92	13.35	16.02	16.52	16.45	12.95	8.4	14.61	9.78	13.06	12.5	14.9	16.79	13.8	10.85	9.12	14.25	13.95
LOC108982220	0.63	0.46	0.19	0.26	0.46	0.15	0.15	0.27	0.32	0.16	0.43	0.38	0.65	0.32	0.38	0.5	0.43	0.25
LOC108982222	0.5	1.81	1.42	0.84	2.67	1.07	2.45	1.72	0.87	0.8	0.33	0.89	1.61	1.59	1.11	1.75	0.47	0.23
LOC108982228	2.78	4.92	2.89	5.62	6.83	4.73	5.58	4.74	3.86	4.14	2.98	4.33	3.06	3.1	5.99	3.47	4.02	2.65
LOC108982231	23.9	18.2	23.42	37.49	37.1	30.12	35	18.53	30.11	24.23	24.14	21.34	15.51	21.39	24.56	22.89	31.94	30.69
LOC108982233	0.62	1.47	0.41	0.24	0.75	0.36	2.15	1.3	1.05	0.63	0.74	0.58	1.32	1.42	1.22	1.24	1.61	1.21
LOC108982234	14.99	12.96	16.39	11.59	13.97	12.29	7.82	11.37	7.5	8.78	9.77	11.43	6.65	9.64	8.97	10.09	7.3	8.63
LOC108982235	9.42	12.48	10.82	11.43	12.69	12.48	7.83	10.41	8.64	8.15	9	10.48	9.68	10.85	8.03	8.46	6.12	8
LOC108982237	0	0	0	0	0	0	0	0	0	0	0	0	0	0	0	0	0	0
LOC108982238	22.13	27.4	18	64.69	75.27	62.18	65.02	32.95	49.44	27.72	24.88	27.89	34.44	30	55.6	28.51	43.57	41.53
LOC108982239	6.35	7.68	5.48	8.92	11.39	7.55	10.63	9.19	9.25	9.8	7.78	8.37	9.3	8.77	10.64	7.55	8.47	8.9
LOC108982240	4.54	5.8	4.57	8.45	5.79	2.62	1.73	7.32	2.49	9.05	7.76	15.25	5.26	6.8	6.19	1.86	3.79	3.23
LOC108982241	0	0	0	0	0.23	0.07	0.03	0	0	0	0	0.09	0	0	0	0	0	0.15
LOC108982245	0	0	0	0	0.05	0.05	0	0.05	0	0	0	0	0	0.05	0.1	0.1	0	0
LOC108982246	9	11.13	11.53	17.11	17	13.53	9.94	10.79	9.14	8.02	7.58	10.74	7.26	9.92	10.47	9.14	8.56	6.46
LOC108982247	2.83	2.2	2.75	3.44	5.54	5.35	7.86	4.45	4.92	4.5	2.44	4.74	2.98	3.63	6.45	2.29	5.38	4.79
LOC108982248	7.88	10.23	5.52	12.25	11.87	9.1	15.61	11.43	13.74	16.14	18.78	9.85	16.86	9.57	17.17	9.51	13.96	11.91
LOC108982249	0.33	0.45	0.05	0.17	0.12	0.11	0.35	0.85	0.46	0.12	0.33	0.31	0.58	0.47	0.23	0.11	0	1.08
LOC108982250	29.47	26.93	27.56	56.46	58.41	40.89	71.25	37.01	66.7	57.35	52.06	44.36	37.31	36.63	75.62	47.63	76.96	66.98
LOC108982251	20.33	22.97	19.93	22.11	19.29	21.52	24.68	18.11	23.99	21.93	24.07	26.44	22.02	19.16	21.18	19.39	27.13	24.86
LOC108982252	2.08	1.43	0.96	0.87	0.64	1.71	6.95	3.31	2.93	19.5	31.26	21.92	9.52	9.38	9.45	4.38	12.9	18.95
LOC108982254	1.81	2.68	1.92	2.52	3.11	2.67	2.56	2.97	2.2	2.24	1.26	2.86	2.13	3.92	3.21	1.5	1.7	1.84
LOC108982257	17.26	13.09	14.57	20.01	14.07	15.92	7.87	10.51	11.51	14.99	11.72	15.75	8.83	9.48	10.04	10.91	18.94	10.7
LOC108982261	4563.47	3047.58	3947.2	2120.33	1356.3	2586.63	387.02	3361.38	771.96	1377.87	1392.47	3978.2	2821.64	3932.78	671.43	695.39	715.19	1225.77
LOC108982262	0.04	0.18	0	0.04	0.09	0.31	0	0.04	0.05	0.1	0.04	0.04	0.04	0.16	0	0	0.05	0
LOC108982263	0.47	0.08	0.46	0.31	0.5	0.16	0	0	0	0.43	0.23	0.15	0.67	0.37	0.08	0	0	0
LOC108982264	0	0	0	0	0	0	0.07	0	0	0	0	0	0	0	0	0	0	0
LOC108982265	43.19	34	41.56	33.06	29.78	34.08	28.84	40.79	32.3	36.83	41.02	46.78	37.91	46.16	21.18	23.33	24.79	32.01
LOC108982267	0	0.2	0	0.13	0	0	0.14	0.07	0.07	0.15	0.13	0.25	0.06	0	0.14	0	0.21	0.07
LOC108982268	3.16	4.59	4.01	4.15	2.05	1.18	2.88	2.13	2.99	6.54	1.48	1.68	1.5	1.24	2.67	1.7	6.25	7.01
LOC108982269	2.47	1.19	4.67	18.41	31.99	23.92	11.02	11.81	17.52	9.69	5.53	6.62	3.78	5.91	22.34	12.28	10.95	9.98
LOC108982270	11.38	11.65	12.11	39.1	51.67	44.48	22.67	12.25	23.44	15.45	12.76	16.55	16.55	15.76	31.54	13.29	18.94	19.82
LOC108982271	0.65	1.22	0.93	0.94	0.77	0.61	0.31	0.98	0.97	1.01	1.53	0.86	0.92	0.48	0.76	2.3	0.55	0.42
LOC108982273	0	0	0	0	0	0	0	0.01	0	0	0	0	0	0	0	0	0	0
LOC108982275	5.54	7.7	6.67	7.62	8.79	7.96	9.53	7.29	8.99	7.87	4.72	9.03	9.51	7.27	10.35	7.3	6.32	9.23
LOC108982276	1.24	0.6	2.07	2.52	12.47	15.59	14.81	6.1	3.88	1.09	2.57	2.18	0.85	1.49	7.84	3.68	9.53	20.34
LOC108982277	0.46	0.76	0.71	0.07	0.52	1.2	1.48	0.91	0.44	0.65	0.71	1.08	0.6	0.72	0.34	1.45	0.34	0.1
LOC108982278	0.45	0.68	0.93	1.12	1.31	0.85	0.7	1.21	1.1	1.11	1.04	1.74	1.67	1.48	0.58	0.22	0.41	0.75
LOC108982280	0	0	0	0	0	0	0	0	0	0	0	0.06	0	0	0	0	0	0
LOC108982281	34.56	28.92	36.15	46.48	39.5	36.57	21.08	22.32	23.78	29.19	34.82	37.8	21.15	29.75	27.99	24.61	30.73	27.6
LOC108982283	2.65	2.57	2.45	5.31	8.43	5.5	3.05	3.16	2.4	3.66	2.44	2.8	3.61	3.93	4.83	2.65	2.59	2.53
LOC108982284	12.79	10.79	11.87	11.9	13.78	11.79	5.42	9.15	6.31	11.22	11.48	10.65	5.59	8.84	7.23	8.53	7.98	8.14
LOC108982285	19.62	14.44	19.36	16.66	11.88	18.05	11.01	12.79	11.47	14.86	25.35	19.97	13.14	17.2	9.07	18.41	11.87	14.85
LOC108982286	66.72	63.67	58.5	88.9	71.74	72.86	73.3	58.78	82.3	80.92	89.36	82.81	53.12	56.85	65.61	56.67	71.09	71.3
LOC108982288	4.11	2.69	7.31	20.22	13.6	63.01	15.07	10.18	35.16	27.77	10.14	19.01	3.68	9.36	21.24	12.68	15.38	4.34
LOC108982289	10.46	10.78	11.61	11.82	10.71	11.04	11.15	8.65	11.26	10	8.22	8.54	11.82	8.68	11	11.22	10.18	9.62
LOC108982291	18.42	15.2	16.94	19.26	16.13	18.57	11.66	16.65	11.9	18.11	17.94	19.38	13.86	19.38	13.02	13.53	12.32	12.14
LOC108982292	21.33	4.47	6.45	0.38	1.29	4.3	1.13	3.37	0.5	1.3	0.92	0.56	2.11	1.05	0.26	8.14	0.58	0.32
LOC108982293	4.62	5.35	7.09	11.25	6.82	5.64	1.7	2.96	4.44	4.93	2.49	4.29	5.16	2.53	5.3	6.92	3.11	6.53
LOC108982294	0.04	0.08	0.03	0.09	0.2	0.25	2.65	0.07	0.52	0.8	0.21	0.26	0.27	0.17	1.68	0.17	1.95	1.48
LOC108982295	0.04	0.08	0.04	0	0.27	0.04	1.01	0.04	0.26	0.09	0.21	0.16	0.36	0.12	0.66	0.53	0.65	0.69
LOC108982296	0	0	0	0	0	0.03	0	0	0.07	0	0.03	0	0.09	0.06	0.1	0	0.07	0
LOC108982299	0.08	0.18	0.18	0.05	0.3	0	0.03	0.12	0.09	2.72	0.13	0.17	2.77	3.97	8.13	7.51	10.07	13.45
LOC108982300	16.15	16.78	16.16	16.53	13.02	15.67	11.14	16.62	12.76	17.08	17.46	16.74	10.59	15.25	13.69	16.91	13.46	13.17
LOC108982301	7.31	7.18	8.55	15.65	12.43	11.95	31.2	11.4	24.29	21.92	20.4	13.86	7.26	11.12	22.79	14.55	20.34	18.91
LOC108982302	5.76	6.8	5.36	3.03	3.11	4.11	2.49	5.24	2.21	3.41	3.26	6.2	4.35	6.67	2.87	1.84	2.19	1.46
LOC108982303	50.39	45.84	51.54	46.7	60.14	51.27	52.6	56.77	67.85	57.31	51.39	44.56	89.62	68.14	64.77	54.56	47.72	55.82
[truncated: 29,126 more rows]
