# Supplementary material for: Transcriptomic and coexpression network analyses revealed the regulatory mechanism of Cydia pomonella infestation on the synthesis of phytohormones in walnut husks
Source: PeerJ. 2024 Sep 23;12:e18130. doi: 10.7717/peerj.18130 (PMC11426320; doi:10.7717/peerj.18130)
Supplement: Supplemental Information 10 [file peerj-12-18130-s010.xlsx]

## Sheet: Sheet1
Table S8 Number of genes in each module
Module	Gene number
black	629
blue	1782
brown	1371
cyan	184
green	741
greenyellow	444
magenta	609
midnightblue	95
pink	614
purple	585
red	710
salmon	209
tan	256
turquoise	2440
yellow	961
grey	32
