# Supplementary material for: Transcriptomic and coexpression network analyses revealed the regulatory mechanism of Cydia pomonella infestation on the synthesis of phytohormones in walnut husks
Source: PeerJ. 2024 Sep 23;12:e18130. doi: 10.7717/peerj.18130 (PMC11426320; doi:10.7717/peerj.18130)
Supplement: Supplemental Information 11 [file peerj-12-18130-s011.xlsx]

## Sheet: Sheet1
Table S9 List of genes related to ‘MAPK signaling pathway’ from the MEturquoise module
GeneID	NR
LOC109018060	PREDICTED: calmodulin-like protein 11 isoform X1 [Juglans regia]
LOC109018782	PREDICTED: calmodulin-like protein 11 isoform X1 [Juglans regia]
novel.1429	putative calcium binding protein cml10 [Quercus suber]
LOC109002939	PREDICTED: catalase isozyme 1 [Juglans regia]
LOC108998009	PREDICTED: probable LRR receptor-like serine/threonine-protein kinase At1g56140 isoform X1 [Juglans regia]
LOC108998363	PREDICTED: G-type lectin S-receptor-like serine/threonine-protein kinase SD2-5 [Juglans regia]
LOC109001258	PREDICTED: cysteine-rich receptor-like protein kinase 2 [Juglans regia]
LOC109001730	PREDICTED: probable LRR receptor-like serine/threonine-protein kinase At1g56140 isoform X1 [Juglans regia]
LOC109002052	PREDICTED: G-type lectin S-receptor-like serine/threonine-protein kinase SD2-2 [Juglans regia]
LOC109003451	PREDICTED: receptor like protein kinase S.2 [Juglans regia]
LOC109006273	PREDICTED: probable receptor-like protein kinase At5g20050 [Juglans regia]
LOC109009770	PREDICTED: probable receptor-like protein kinase At5g20050 [Juglans regia]
LOC109011453	PREDICTED: rust resistance kinase Lr10-like [Juglans regia]
LOC109020671	PREDICTED: probable leucine-rich repeat receptor-like serine/threonine-protein kinase At3g14840 [Juglans regia]
LOC109020672	PREDICTED: probable LRR receptor-like serine/threonine-protein kinase At1g07650 isoform X1 [Juglans regia]
LOC108983170	PREDICTED: rust resistance kinase Lr10-like isoform X1 [Juglans regia]
LOC108987404	PREDICTED: probable leucine-rich repeat receptor-like protein kinase At5g63930 [Juglans regia]
LOC108988018	PREDICTED: LEAF RUST 10 DISEASE-RESISTANCE LOCUS RECEPTOR-LIKE PROTEIN KINASE-like 2.4 [Juglans regia]
LOC108980557	PREDICTED: probable inactive receptor kinase At4g23740 [Juglans regia]
LOC108996397	PREDICTED: G-type lectin S-receptor-like serine/threonine-protein kinase LECRK1 [Juglans regia]
LOC108996958	PREDICTED: G-type lectin S-receptor-like serine/threonine-protein kinase LECRK1 [Juglans regia]
LOC108996996	PREDICTED: G-type lectin S-receptor-like serine/threonine-protein kinase LECRK1 [Juglans regia]
LOC108999109	PREDICTED: MDIS1-interacting receptor like kinase 2-like isoform X1 [Juglans regia]
LOC108999137	PREDICTED: uncharacterized protein At4g06744-like [Juglans regia]
LOC108984879	PREDICTED: probable leucine-rich repeat receptor-like protein kinase At1g35710 [Juglans regia]
LOC108979764	PREDICTED: uncharacterized protein At4g06744-like [Juglans regia]
LOC108989444	PREDICTED: leucine-rich repeat extensin-like protein 6, partial [Juglans regia]
LOC108995994	PREDICTED: MDIS1-interacting receptor like kinase 2-like [Juglans regia]
LOC108995995	PREDICTED: MDIS1-interacting receptor like kinase 2-like [Juglans regia]
LOC109014468	PREDICTED: transcription factor EGL1-like isoform X1 [Juglans regia]
LOC108986123	PREDICTED: transcription factor MYC3-like [Juglans regia]
LOC108993751	PREDICTED: transcription factor MYC2-like [Juglans regia]
LOC108993752	PREDICTED: transcription factor MYC4-like [Juglans regia]
LOC108999092	PREDICTED: probable WRKY transcription factor 61 [Juglans regia]
LOC109003208	PREDICTED: probable WRKY transcription factor 75 [Juglans regia]
LOC109012564	PREDICTED: probable WRKY transcription factor 31 [Juglans regia]
LOC109013426	PREDICTED: probable WRKY transcription factor 9 [Juglans regia]
LOC108984287	PREDICTED: probable WRKY transcription factor 31 [Juglans regia]
LOC108987036	PREDICTED: probable WRKY transcription factor 75 isoform X1 [Juglans regia]
LOC108987784	PREDICTED: WRKY transcription factor WRKY24-like [Juglans regia]
LOC108998106	PREDICTED: WRKY transcription factor 22-like [Juglans regia]
LOC109006404	PREDICTED: WRKY transcription factor 22-like [Juglans regia]
LOC109010041	PREDICTED: probable WRKY transcription factor 65 [Juglans regia]
LOC108983872	PREDICTED: probable WRKY transcription factor 29 isoform X1 [Juglans regia]
LOC108997461	PREDICTED: respiratory burst oxidase homolog protein D [Juglans regia]
LOC108997479	PREDICTED: respiratory burst oxidase homolog protein A-like [Juglans regia]
LOC108991133	PREDICTED: pathogenesis-related protein PR-1-like [Juglans regia]
LOC108992380	PREDICTED: pathogenesis-related protein 1-like [Juglans regia]
LOC108982305	PREDICTED: abscisic acid receptor PYL4 [Juglans regia]
LOC108991765	PREDICTED: abscisic acid receptor PYL4-like [Juglans regia]
LOC109008983	PREDICTED: protein phosphatase 2C 77 [Juglans regia]
LOC108981795	PREDICTED: serine/threonine-protein kinase SAPK2-like [Juglans regia]
LOC109012760	PREDICTED: serine/threonine-protein kinase SAPK7 isoform X1 [Juglans regia]
LOC109007220	PREDICTED: ethylene receptor 2-like [Juglans regia]
LOC108983523	PREDICTED: ethylene receptor 2-like [Juglans regia]
LOC108993629	PREDICTED: protein EIN4 [Juglans regia]
LOC109005059	PREDICTED: mitogen-activated protein kinase homolog D5-like [Juglans regia]
LOC109007057	PREDICTED: ethylene-responsive transcription factor 1B [Juglans regia]
LOC108994448	PREDICTED: ethylene-responsive transcription factor 1B-like [Juglans regia]
LOC109007821	PREDICTED: putative leucine-rich repeat receptor-like serine/threonine-protein kinase At2g19230 [Juglans regia]
LOC108984187	PREDICTED: putative leucine-rich repeat receptor-like serine/threonine-protein kinase At2g14440 [Juglans regia]
LOC109002303	PREDICTED: basic endochitinase C-like [Juglans regia]
LOC109002304	PREDICTED: basic endochitinase C-like [Juglans regia]
LOC109005051	PREDICTED: chitinase-like protein 1 [Juglans regia]
LOC109013643	PREDICTED: chitinase-like protein 1 [Juglans regia]
LOC109020302	PREDICTED: chitinase 10-like [Juglans regia]
LOC108995213	PREDICTED: barwin-like [Juglans regia]
novel.1696	PREDICTED: basic endochitinase C like [Juglans regia]
LOC108996864	PREDICTED: transcription factor RF2b-like [Juglans regia]
LOC109002418	PREDICTED: transcription factor RF2b-like [Juglans regia]
LOC109009957	PREDICTED: transcription factor bHLH96-like [Juglans regia]
LOC109004185	PREDICTED: mitogen-activated protein kinase homolog MMK2-like [Juglans regia]
LOC108997283	PREDICTED: LEAF RUST 10 DISEASE-RESISTANCE LOCUS RECEPTOR-LIKE PROTEIN KINASE-like 2.1 [Juglans regia]
LOC108999068	PREDICTED: G-type lectin S-receptor-like serine/threonine-protein kinase At1g11330 [Juglans regia]
LOC108981087	PREDICTED: G-type lectin S-receptor-like serine/threonine-protein kinase At1g11330 isoform X1 [Juglans regia]
LOC109000270	PREDICTED: G-type lectin S-receptor-like serine/threonine-protein kinase At4g03230 isoform X1 [Juglans regia]
LOC109006267	PREDICTED: receptor-like serine/threonine-protein kinase SD1-8 isoform X1 [Juglans regia]
LOC109008043	PREDICTED: LEAF RUST 10 DISEASE-RESISTANCE LOCUS RECEPTOR-LIKE PROTEIN KINASE-like 2.3 [Juglans regia]
LOC109008064	PREDICTED: mitogen-activated protein kinase kinase kinase 2-like isoform X1 [Juglans regia]
LOC109011125	PREDICTED: G-type lectin S-receptor-like serine/threonine-protein kinase CES101 isoform X1 [Juglans regia]
LOC108979089	PREDICTED: cysteine-rich receptor-like protein kinase 2 [Juglans regia]
LOC109020109	PREDICTED: cysteine-rich receptor-like protein kinase 2 [Juglans regia]
LOC109022027	PREDICTED: G-type lectin S-receptor-like serine/threonine-protein kinase At1g11330 [Juglans regia]
LOC108985198	PREDICTED: G-type lectin S-receptor-like serine/threonine-protein kinase At4g27290 isoform X1 [Juglans regia]
LOC108986975	PREDICTED: receptor-like serine/threonine-protein kinase SD1-8 [Juglans regia]
LOC109009089	PREDICTED: mitogen-activated protein kinase kinase kinase YODA-like [Juglans regia]
LOC108983203	PREDICTED: mitogen-activated protein kinase kinase kinase A-like [Juglans regia]
LOC108998664	PREDICTED: LRR receptor-like serine/threonine-protein kinase ERL1 [Juglans regia]
LOC109012495	PREDICTED: receptor protein kinase-like protein ZAR1 [Juglans regia]
LOC109021033	PREDICTED: uncharacterized protein At4g06744-like [Juglans regia]
LOC108990023	PREDICTED: leucine-rich repeat receptor-like protein kinase PXC2 [Juglans regia]
LOC109009680	PREDICTED: protein REVERSION-TO-ETHYLENE SENSITIVITY1 [Juglans regia]
LOC108997341	PREDICTED: 1-aminocyclopropane-1-carboxylate synthase-like [Juglans regia]
LOC109006403	PREDICTED: 1-aminocyclopropane-1-carboxylate synthase [Juglans regia]
