# Supplementary material for: Transcriptomic and coexpression network analyses revealed the regulatory mechanism of Cydia pomonella infestation on the synthesis of phytohormones in walnut husks
Source: PeerJ. 2024 Sep 23;12:e18130. doi: 10.7717/peerj.18130 (PMC11426320; doi:10.7717/peerj.18130)
Supplement: Supplemental Information 14 [file peerj-12-18130-s014.xlsx]

## Sheet: Proportion of damage
Proportion of damage to the walnut husk and kernel
Time of C. pomonella feeding (h)	Number of C. pomonella	Number of damage walnut husk	Number of damage walnut kernel
12	16	16	0
	16	16	0
	16	16	0
24	16	16	0
	16	16	0
	16	16	0
36	16	16	0
	16	16	0
	16	16	0
48	16	15	1
	16	16	0
	16	16	0
72	16	7	9
	16	5	11
	16	4	12

## Sheet: growth and development 
Effects of walnut fruit on the growth and development of the C. pomonella larvae
kernel				husk
Larval body length/mm	larval head capsule width/mm	larval body weight/g	larval developmental duration/d	Larval body length/mm	larval head capsule width/mm	larval body weight/g	larval developmental duration/d
14.61	1.68	0.038	19	9.64	1.13	0.024	29
14.51	1.63	0.031	20	9.31	1.11	0.029	28
13.64	1.53	0.031	19	9.31	1.17	0.025	30
14.56	1.62	0.039	17	9.42	1.03	0.027	29
14.89	1.59	0.035	16	8.65	1.08	0.019	29
15.54	1.68	0.039	18	9.94	1.18	0.027	28
15.24	1.63	0.038	17	8.52	1.13	0.025	29
15.49	1.61	0.044	16	9.12	1.11	0.031	28
14.38	1.53	0.037	19	10.52	1.09	0.034	29
15.69	1.61	0.033	16	9.94	1.05	0.024	28
15.87	1.58	0.044	16	9.75	1.09	0.025	28
14.12	1.67	0.048	17	9.16	1.17	0.026	28
15.58	1.66	0.049	18	9.62	1.13	0.026	29
15.56	1.64	0.041	19	10.93	1.09	0.028	29
14.46	1.66	0.042	19	9.682	1.13	0.022	30
15.79	1.58	0.037	18	10.89	1.03	0.024	29
14.48	1.69	0.043	18	9.85	1.14	0.031	29
15.19	1.6	0.038	19	9.98	1.13	0.028	28
15.47	1.65	0.034	18	10.97	1.16	0.026	28
16.18	1.54	0.041	17	9.97	1.14	0.032	29
16.1	1.62	0.036	17	9.77	1.04	0.025	28
14.73	1.6	0.037	18	9.82	1.14	0.025	27
15.97	1.61	0.036	17	9.97	1.04	0.024	28
15.55	1.64	0.029	18	10.01	1.14	0.024	28
16.09	1.66	0.036	17	10.36	1.03	0.028	29
14.11	1.61	0.032	16	9.02	1.14	0.026	27
15.48	1.6	0.033	17	10.69	1.14	0.027	28
14.13	1.6	0.033	19	10.81	1.13	0.024	28
15.01	1.64	0.032	17	10.69	1.03	0.021	30
14.88	1.62	0.034	18	9.02	1.07	0.023	29

## Sheet: phytohormone content
Content of the main phytohormonesin walnut husk at different time points after C. pomonella infestation
	ABA	JA	SA	JA-ILE	JA-Val	MEJA
0h	10.8293	12.9892	22.0578	3.79998	0.172909	0.122754
	15.1841	14.7273	18.5728	1.88115	0.151762	0.143357
	13.9839	12.9482	21.0281	1.97973	0.188038	0.121575
12h	13.0084	56.8563	43.4363	14.7429	1.00947	0.351649
	14.8828	73.6092	52.0013	12.1683	1.07233	0.506869
	10.717	64.1996	44.5485	12.5318	1.07566	0.243424
24h	13.5149	60.1865	79.5717	6.9485	0.573153	0.722167
	13.6944	59.9915	80.5982	6.72292	0.671569	0.811128
	16.9236	73.6105	85.1231	8.81267	0.47223	0.602759
36h	28.9007	40.2354	73.3799	12.7664	1.02808	0.857801
	28.767	62.3211	77.9375	12.2229	0.709395	1.14311
	25.515	48.5712	70.6694	14.1949	0.964837	0.628532
48h	48.7899	133.168	77.3604	13.9596	1.27086	1.87364
	47.0205	125.552	74.7901	16.7583	1.27851	1.20257
	47.5652	118.913	81.1877	14.6037	1.31486	2.24513
72h	30.7794	217.463	69.5331	25.9634	2.60339	1.60276
	33.6063	189.546	67.5282	28.5498	1.92627	1.21922
	32.5545	192.851	72.0861	31.874	2.02575	1.15228

## Sheet: FPKM of 18 hub genes 
FPKM of 18 hub genes
	LOC108979694	LOC108991021	LOC109019220	LOC108990221	LOC108984287	LOC109019370	LOC109003208	LOC108990159	LOC109017731	LOC109007532	LOC108982947	LOC109020090	LOC108998614	LOC109013840	LOC108988687	LOC108990250	LOC108980184	LOC108996080
0h-1_fpkm	0.02	0	0.07	0	0.24	0	0	10.19	2.46	0.68	7.68	5.46	1.09	6.47	0.52	0.06	22.7	4.52
0h-2_fpkm	0.09	0	0	0.2	0.07	0	0	12.01	3.26	0.47	4.61	5.43	5.22	8.21	0.29	0	20.56	4.34
0h-3_fpkm	0	0	0.07	0.04	0.32	0	0.17	8.51	2.51	1.02	6.18	5.99	4.29	11.22	0.56	0.36	25.7	4.9
12h-1_fpkm	1.08	7.18	6.08	5.99	3.48	0.53	13.03	4.05	5.49	0.3	4.98	3.96	0.44	3.67	2.12	0.62	16.36	0.94
12h-2_fpkm	4.63	38.26	11.01	26.19	12.91	2.73	23.21	4.18	8.91	0.22	2.84	3.18	3.15	13.94	2	7.64	55.16	4.63
12h-3_fpkm	0.33	4.4	8.85	3.11	2.86	0.09	11.04	4.25	6.9	0.64	4.48	4.5	6.93	39.45	3.59	5.98	68.69	12.94
24h-1_fpkm	19.11	222.43	101.11	77.65	69.37	160.84	85.61	4.94	8.29	0.63	4.04	2.21	34.54	53.74	9.72	12.16	106.28	10.8
24h-2_fpkm	1.33	19.36	0.28	1.72	3.16	13.07	9.74	14.04	7.21	3.6	12.2	8.8	21.14	15.07	3	3.67	52.89	8.12
24h-3_fpkm	4.56	134.16	55	35.98	35.37	125.81	56.44	7.55	6.79	0.72	3.69	3.86	23.83	37.64	4.85	15.58	50.89	4.11
36h-1_fpkm	4.14	47.95	14.96	7.19	11.65	18.3	8.28	12.55	20.31	3.63	19.34	4	4.54	7.06	4.79	5.09	49.16	9.58
36h-2_fpkm	0.35	34.55	1.54	4.01	5.26	0.87	6.94	7.03	12.36	1.89	17.07	3.86	4.37	6.54	3.74	1.21	47.36	5.97
36h-3_fpkm	0.15	2.38	0.45	0.07	0.61	0.08	0.7	10.29	24.54	1.95	21.61	6.62	13.22	13.39	1.05	0.58	38.86	13.53
48h-1_fpkm	1.1	22.94	1.57	2.28	2.32	9.56	2.26	26.94	38.68	10.59	16.76	10.53	13.12	4.7	1.76	2.13	23.05	5.33
48h-2_fpkm	1.04	38.21	0.65	1.21	4.82	6.64	1.57	17.51	26.26	10.11	17.99	9.67	26.1	13.05	2.82	3.78	39.74	11.03
48h-3_fpkm	11.16	184.26	56.31	34.91	54.93	91.95	85.81	8.86	20.86	2.7	7.52	2.09	11.6	48.42	9.27	17.96	82.14	7.89
72h-1_fpkm	4.31	84.42	12.59	9.84	40.11	28.33	47.47	6.62	3.07	0.07	2.29	0.94	102.65	72.66	11.88	19.81	147.27	40.87
72h-2_fpkm	13.3	94.45	41.25	29.17	30.44	107.92	27.85	9.27	3.88	0.18	2.36	1.78	6.85	11.54	4.87	7.58	40.37	2.77
72h-3_fpkm	12.34	71.85	43.57	17.9	18.95	67.89	22.64	8.01	4.48	0.1	3.91	1.41	8.93	21.62	3.1	3.88	45.86	2.81
The first row (from B2 to S2) indicates gene ID. The first column (from A3 to A20) indicates 6 sequencing husk (each contains 3 independent biological repeats, resulting in a total of 18 samples) in this study.

## Sheet: Raw qPCR data of 18 hub genes
Raw qPCR data of 18 hub genes
	LOC108979694	LOC108991021	LOC109019220	LOC108990221	LOC108984287	LOC109019370	LOC109003208	LOC108990159	LOC109017731	LOC109007532	LOC108982947	LOC109020090	LOC108998614	LOC109013840	LOC108988687	LOC108990250	LOC108980184	LOC108996080
0h-1_qPCR	0.00694903	0.200173	0.0243216	0.0916124	0.0833884	0.0924857	0.11537	6.17575	1.0168	0.281067	2.24604	4.47779	0.450534	2.67427	0.214934	0.0248	9.38268	1.86827
0h-2_qPCR	0.0117133	0.091249	0.0731869	0.0932433	0.0168881	0.176349	0.201832	8.98736	1.36328	0.196547	1.92783	3.90287	2.18293	3.4333	0.121274	0.134346	8.59789	1.81492
0h-3_qPCR	0.198723	0.191422	0.0275561	0.0157463	0.125971	0.127026	0.0578974	3.48969	0.849177	0.345084	1.56226	5.18255	1.45138	3.79592	0.189458	0.121794	8.69476	1.65776
12h-1_qPCR	0.951144	2.22156	2.97274	2.04003	1.18519	0.178649	4.65007	2.24737	2.71102	0.148143	1.64624	3.86316	0.217277	1.81228	1.04688	0.306163	8.07874	0.464182
12h-2_qPCR	1.1414	12.8965	2.71421	24.791	3.1826	1.45948	18.2174	3.28085	2.75994	0.0681468	0.879713	2.58889	0.975738	4.31803	0.619516	2.36655	24.754	1.43418
12h-3_qPCR	0.0730437	2.35227	3.51491	2.04896	0.633045	0.0586247	3.9696	2.38612	1.86695	0.173167	1.21217	2.65352	1.87507	10.6741	0.971357	1.61803	25.4798	3.50121
24h-1_qPCR	16.7841	144.888	33.15	62.116	53.7364	64.1147	41.3304	2.61097	2.11681	0.160868	1.0316	1.15328	8.81963	13.7223	2.48196	3.105	36.4439	2.75773
24h-2_qPCR	0.620893	7.71736	0.130714	0.802959	1.4752	6.53043	2.63533	9.32874	2.40112	1.79752	4.06293	4.39393	10.5554	7.52461	1.49793	1.83247	26.4085	4.0544
24h-3_qPCR	3.65728	67.0331	21.6512	29.3775	24.8985	56.5503	17.6148	5.27009	1.97026	0.208923	1.07073	2.66898	6.91477	10.922	1.40733	4.52086	14.7668	1.1926
36h-1_qPCR	0.90223	21.553	2.67686	4.52591	2.53888	6.23248	4.07456	7.15942	6.17029	0.845842	5.8756	3.09698	1.05789	1.64508	1.11614	1.18604	21.4525	2.23228
36h-2_qPCR	0.0904238	11.7668	0.397865	2.14363	1.35894	0.310481	1.73219	4.98473	3.91412	0.598519	5.40567	3.33392	1.38388	2.07106	1.18437	0.383179	14.9978	1.89056
36h-3_qPCR	0.0257729	0.849361	0.0773187	0.0120274	0.10481	0.0351794	0.248188	5.08386	6.82286	0.750944	3.86118	4.14597	5.09101	5.15648	0.404354	0.223358	14.965	5.21039
48h-1_qPCR	0.340351	5.36726	0.485773	1.85071	0.717831	3.43745	0.454635	18.1537	15.298	4.18837	6.62862	9.33155	5.18899	1.85886	0.696084	0.84242	9.11633	2.10803
48h-2_qPCR	0.350557	13.739	0.219098	0.40786	1.6247	2.16191	0.494285	11.8856	7.46871	2.87543	5.11661	8.66486	7.4232	3.7116	0.802047	1.07508	11.3026	3.13709
48h-3_qPCR	5.96622	59.993	19.6166	18.6632	29.366	24.8787	31.1131	5.03982	7.5187	0.973178	2.71048	1.77961	4.18106	17.4523	3.34124	6.47344	29.6062	2.84384
72h-1_qPCR	2.80747	22.8414	8.20094	6.40963	26.1271	8.84171	12.1522	2.30443	1.47111	0.0335433	0.741856	0.450439	49.1889	34.818	5.69278	9.49276	70.5704	19.5845
72h-2_qPCR	5.3017	29.4776	16.4432	11.6279	12.1341	53.1071	16.2125	3.39641	1.82461	0.0846467	0.754841	1.58014	3.22128	5.42679	2.29016	3.56457	18.9844	1.30262
72h-3_qPCR	6.16568	35.3571	21.7698	8.94374	9.46837	16.945	5.28771	2.24988	1.31634	0.0293826	1.14886	1.00472	2.62386	6.35251	0.91086	1.14004	21.803	1.16919
The first row (from B2 to S2) indicates gene ID. The first column (from A3to A20) indicates 6 sequencing husk (each contains 3 independent biological repeats, resulting in a total of 18 samples) in this study.
