# Supplementary material for: Transcriptomic and coexpression network analyses revealed the regulatory mechanism of Cydia pomonella infestation on the synthesis of phytohormones in walnut husks
Source: PeerJ. 2024 Sep 23;12:e18130. doi: 10.7717/peerj.18130 (PMC11426320; doi:10.7717/peerj.18130)
Supplement: Supplemental Information 15 [file peerj-12-18130-s015.xlsx]

## Sheet: Sheet1
ITEM TO CHECK	IMPORTANCE	CHECKLIST
EXPERIMENTAL DESIGN		NA
Definition of experimental and control groups	E	0h,12h,24h,36h,48h,72h
Number within each group	E	3
Assay carried out by core lab or investigator's lab?	D	NA
Acknowledgement of authors' contributions	D	NA
SAMPLE		NA
Description	E	hard-core stage
Volume/mass of sample processed	D	3 cm2 area each repetition
Microdissection or macrodissection	E	NA
Processing procedure	E	immediately frozen in liquid nitrogen and stored at -80℃
If frozen - how and how quickly?	E	immediately frozen in liquid nitrogen
If fixed - with what, how quickly?	E	NA
Sample storage conditions and duration (especially for FFPE samples)	E	-80℃ (< 6 months)
NUCLEIC ACID EXTRACTION		NA
Procedure and/or instrumentation	E	following the manufacturers guide
Name of kit and details of any modifications	E	TRIzol reagent
Source of additional reagents used	D	NA
Details of DNase or RNAse treatment	E	DNase
Contamination assessment (DNA or RNA)	E	RNA
Nucleic acid quantification	E	good
Instrument and method	E	nucleic acid protein concentration analyzer
Purity (A260/A280)	D	1.9
Yield	D	NA
RNA integrity method/instrument	E	agarose gel electrophoresis
RIN/RQI or Cq of 3' and 5' transcripts	E	RQI 10
Electrophoresis traces	D	NA
Inhibition testing (Cq dilutions, spike or other)	E	10-fold dilution
REVERSE TRANSCRIPTION		NA
Complete reaction conditions	E	20μl
Amount of RNA and reaction volume	E	1μg
Priming oligonucleotide (if using GSP) and concentration	E	Oligo (dT)23VN (50 µM); 1μl
Reverse transcriptase and concentration	E	4×Hifair® Ⅲ SuperMix; 5μl
Temperature and time	E	25℃ 5min; 55℃ 15min; 85℃ 5min
Manufacturer of reagents and catalogue numbers	D	NA
Cqs with and without RT	D*	NA
Storage conditions of cDNA	D	NA
qPCR TARGET INFORMATION		NA
If multiplex, efficiency and LOD of each assay.	E	no multiplex
Sequence accession number	E	LOC109020090 (NC_049903.1), LOC108990159 (NC_049909.1), LOC108982947 (NC_049916.1), LOC109017731 (NC_049905.1), LOC109007532 (NC_049916.1); LOC108991021 (NC_049908.1), LOC108979694 (NC_049908.1), LOC108990221 (NC_049904.1), LOC109019220 (NC_049916.1), LOC109019370 (NC_049907.1), LOC108984287 (NC_049901.1), LOC109003208 (NC_049913.1); LOC108998614 (NC_049901.1), LOC109013840 (NC_049908.1), LOC1089…
Location of amplicon	D	NA
Amplicon length	E	100-300bp
In silico specificity screen (BLAST, etc)	E	genebank
Pseudogenes, retropseudogenes or other homologs?	D	NA
Sequence alignment	D	NA
Secondary structure analysis of amplicon	D	NA
Location of each primer by exon or intron (if applicable)	E	cross-intron
What splice variants are targeted?	E	no secondary structure
qPCR OLIGONUCLEOTIDES		NA
Primer sequences	E	please see Table S2
RTPrimerDB Identification Number	D	NA
Probe sequences	D**	NA
Location and identity of any modifications	E	no
Manufacturer of oligonucleotides	D	NA
Purification method	D	NA
qPCR PROTOCOL		NA
Complete reaction conditions	E	20μl
Reaction volume and amount of cDNA/DNA	E	2μl cDNA
Primer, (probe), Mg++ and dNTP concentrations	E	primer 0.5μl; Hieff® qPCR SYBR Green Master Mix 10 μl
Polymerase identity and concentration	E	Hieff® qPCR SYBR Green Master Mix 10 μl
Buffer/kit identity and manufacturer	E	Hieff® qPCR SYBR Green Master Mix(Low Rox Plus); YEASEN
Exact chemical constitution of the buffer	D	NA
Additives (SYBR Green I, DMSO, etc.)	E	SYBR Green
Manufacturer of plates/tubes and catalog number	D	NA
Complete thermocycling parameters	E	95 °C 10 s[40], 60 °C for 30 s[40],
Reaction setup (manual/robotic)	D	NA
Manufacturer of qPCR instrument	E	Applied Biosystems
qPCR VALIDATION		NA
Evidence of optimisation (from gradients)	D	NA
Specificity (gel, sequence, melt, or digest)	E	melt 80-85℃
For SYBR Green I, Cq of the NTC	E	NA
Standard curves with slope and y-intercept	E	NA
PCR efficiency calculated from slope	E	0.95
Confidence interval for PCR efficiency or standard error	D	NA
r2 of standard curve	E	NA
Linear dynamic range	E	NA
Cq variation at lower limit	E	NA
Confidence intervals throughout range	D	NA
Evidence for limit of detection	E	NA
If multiplex, efficiency and LOD of each assay.	E	NA
DATA ANALYSIS		NA
qPCR analysis program (source, version)	E	7500 Software V2.3
Cq method determination	E	NA
Outlier identification and disposition	E	NA
Results of NTCs	E	NA
Justification of number and choice of reference genes	E	18S rRNA
Description of normalisation method	E	2−ΔΔCt method
Number and concordance of biological replicates	D	NA
Number and stage (RT or qPCR) of technical replicates	E	3 technical replicates
Repeatability (intra-assay variation)	E	< 0.3
Reproducibility (inter-assay variation, %CV)	D	NA
Power analysis	D	NA
Statistical methods for result significance	E	T-test
Software (source, version)	E	spps,excel
Cq or raw data submission using RDML	D	NA
